# Supplementary material
Source: PubMed Central journal article supplement (PMC11027621)
Supplement: 262_2020_2561_MOESM1_ESM.pdf [file 262_2020_2561_MOESM1_ESM.pdf]

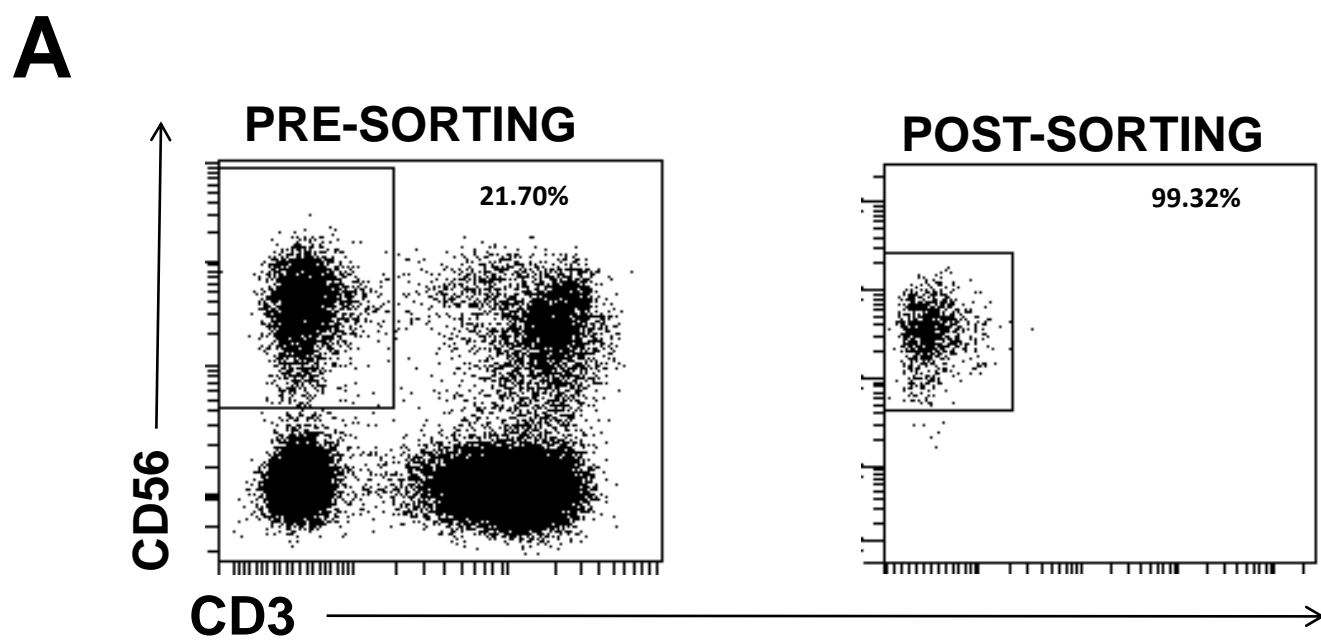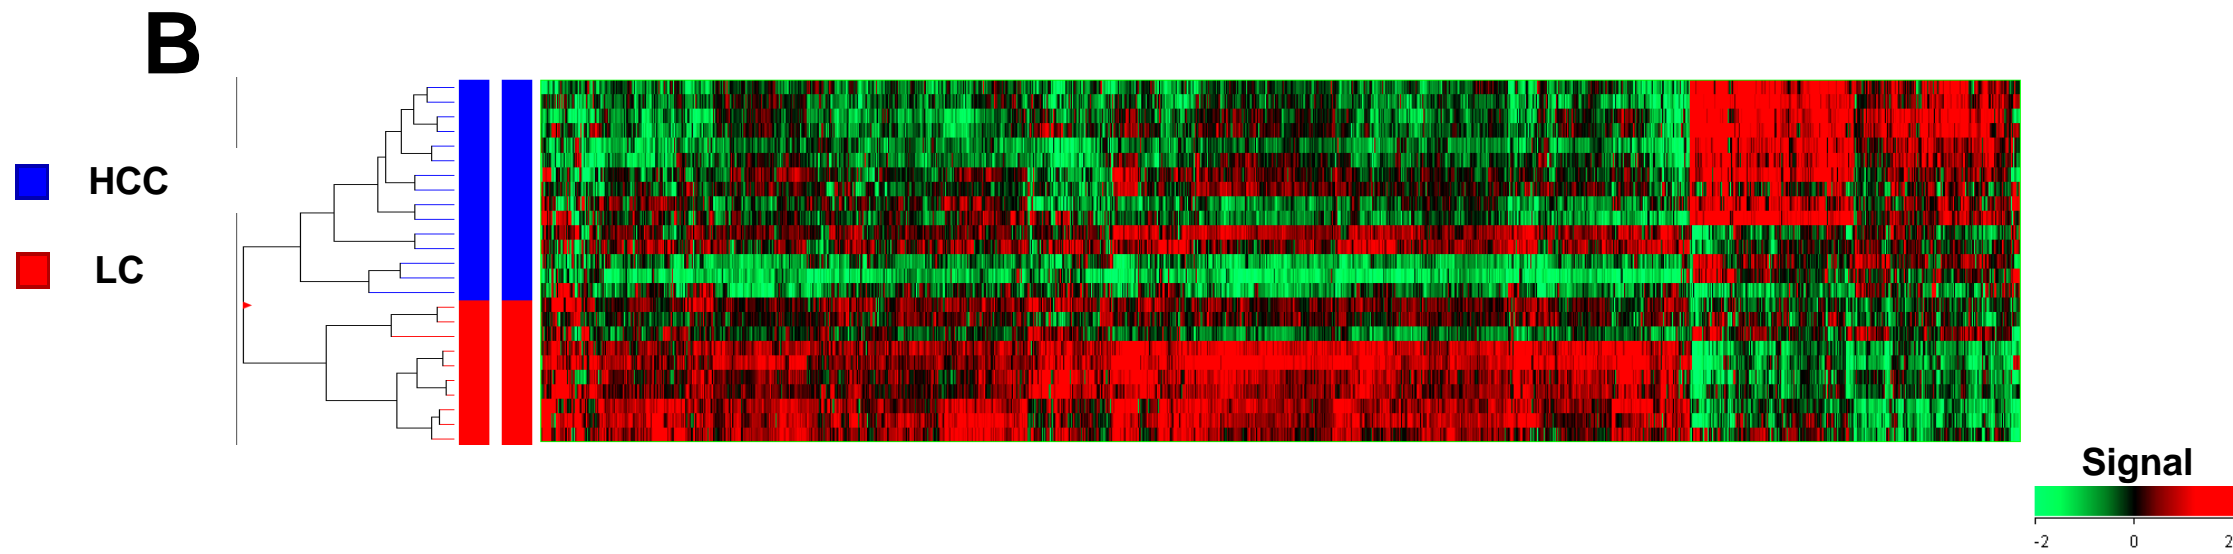

**C**

| Canonical Pathway                                               | HCC vs LC | HCC vs HD | LC vs HD |
|-----------------------------------------------------------------|-----------|-----------|----------|
| CD28 Signaling in T Helper Cells                                | 9.15      | 3.14      | 1.98     |
| iCOS-iCOSL Signaling in T Helper Cells                          | 8.01      | 2.82      | 1.19     |
| Calcium-induced T Lymphocyte Apoptosis                          | 7.83      | 1.79      | 0.43     |
| PKCθ Signaling in T Lymphocytes                                 | 6.10      | 2.54      | 0.65     |
| Role of NFAT in Regulation of the Immune Response               | 6.08      | 1.99      | 1.49     |
| Integrin Signaling                                              | 5.87      | 1.77      | 3.93     |
| Epithelial Adherens Junction Signaling                          | 5.62      | 0.49      | 1.98     |
| Nur77 Signaling in T Lymphocytes                                | 5.55      | 0.76      | 0.00     |
| B Cell Receptor Signaling                                       | 5.46      | 3.30      | 2.30     |
| Natural Killer Cell Signaling                                   | 5.42      | 3.32      | 3.49     |
| OX40 Signaling Pathway                                          | 5.32      | 1.48      | 0.00     |
| Type I Diabetes Mellitus Signaling                              | 5.26      | 2.04      | 0.51     |
| B Cell Development                                              | 5.16      | 2.02      | 0.00     |
| Cdc42 Signaling                                                 | 4.96      | 1.70      | 1.92     |
| NRF2-mediated Oxidative Stress Response                         | 4.93      | 1.14      | 1.96     |
| Fcy Receptor-mediated Phagocytosis in Macrophages and Monocytes | 4.84      | 1.80      | 1.90     |
| Actin Cytoskeleton Signaling                                    | 4.77      | 0.88      | 2.57     |
| T Helper Cell Differentiation                                   | 4.63      | 1.49      | 0.31     |
| Germ Cell-Sertoli Cell Junction Signaling                       | 4.61      | 0.60      | 1.79     |
| T Cell Receptor Signaling                                       | 4.61      | 2.29      | 2.12     |

-log p value

**D**

| Categories                             | Diseases or Functions Annotation          | p-Value  | z-score |
|----------------------------------------|-------------------------------------------|----------|---------|
| Cellular Movement                      | Cell movement                             | 1,58E-10 | -2,906  |
| Cellular Movement                      | Migration of cells                        | 1,25E-08 | -2,605  |
| Infectious Diseases                    | Viral Infection                           | 1,30E-08 | -3,244  |
| Cellular Movement                      | Cell movement of tumor cell lines         | 4,74E-07 | -2,191  |
| Gene Expression                        | Transcription                             | 1,44E-06 | -2,055  |
| Gene Expression                        | Expression of RNA                         | 9,71E-06 | -2,120  |
| Cell Death and Survival                | Cell death of lymphoma cell lines         | 1,14E-05 | 2,919   |
| Cell Death and Survival                | Cell viability of tumor cell lines        | 1,36E-05 | -2,580  |
| Cellular Movement                      | Cell movement of breast cancer cell lines | 1,82E-05 | -2,074  |
| Cell-To-Cell Signaling and Interaction | Adhesion of tumor cell lines              | 2,68E-05 | -2,262  |

**Supplementary Figure 1**

**Gene expression pattern and IPA (ingenuity pathway analysis) of circulating NK-cells from patients with HCV-related liver cirrhosis (LC) or HCC and healthy donors (HD)**

**A.** Representative fluorescence flow-cytometry cell sorting of CD56<sup>+</sup>CD3<sup>-</sup> NK-cells. Left, pre-sorting illustrating the frequency of NK-cells within the overall lymphocyte cell population; right, post-sorting documenting the level of purity of sorted NK-cells. **B.** Heat-map representation of the 1435 differentially expressed genes in NK-cells from HCC and LC patients by Moderated T-test and Benjamini-Hochberg correction ( $p \leq 0.05$ , Fold Change threshold 1.5). Upregulated and downregulated genes are shown in red and green, respectively.

**C.** IPA canonical pathways (CPs) associated with genes differentially expressed in PBNK. Top 20 IPA CPs based on significance. Color intensity is proportional to increasing significance. -log p values are shown.

**D.** Top 10 IPA Diseases and Functions associated with DE genes in the comparison HCC vs LC. Orange: predicted upregulation. Light blue: predicted downregulation.
