# Supplementary material
Source: PubMed Central journal article supplement (PMC11027621)
Supplement: 262_2020_2561_MOESM2_ESM.pdf [file 262_2020_2561_MOESM2_ESM.pdf]

# GSEA HCC versus LC Gene Ontology

| NAME                                                                                     | SIZE | NES      | NOM p-val | FDR q-val |
|------------------------------------------------------------------------------------------|------|----------|-----------|-----------|
| <b>MITOCHONDRIAL DYSFUNCTION</b>                                                         |      |          |           |           |
| GO_INNER_MITOCHONDRIAL_MEMBRANE_PROTEIN_COMPLEX                                          | 90   | -2.18678 | 0         | 0         |
| GO_MITOCHONDRIAL_MEMBRANE_PART                                                           | 137  | -2.01429 | 0         | 0.004719  |
| GO_MITOCHONDRIAL_PROTEIN_COMPLEX                                                         | 115  | -2.03868 | 0         | 0.004798  |
| GO_OXIDOREDUCTASE_ACTIVITY_ACTING_ON_PEROXIDE_AS_ACCEPTOR                                | 23   | -1.9601  | 0         | 0.00756   |
| GO_NADH_DEHYDROGENASE_COMPLEX                                                            | 42   | -1.96615 | 0         | 0.008232  |
| GO_ATP_BIOSYNTHETIC_PROCESS                                                              | 26   | -1.94758 | 0         | 0.008974  |
| GO_ELECTRON_TRANSPORT_CHAIN                                                              | 79   | -1.94113 | 0         | 0.009417  |
| GO_PROTON_TRANSPORTING_TWO_SECTOR_ATPASE_COMPLEX_PROTON_TRANSPORTING_DOMAIN              | 17   | -1.93893 | 0         | 0.009452  |
| GO_MITOCHONDRIAL_RESPIRATORY_CHAIN_COMPLEX_ASSEMBLY                                      | 62   | -1.92775 | 0         | 0.011359  |
| GO_MITOCHONDRIAL_RESPIRATORY_CHAIN_COMPLEX_I_BIOGENESIS                                  | 48   | -1.905   | 0         | 0.015069  |
| GO_MITOCHONDRIAL_ATP_SYNTHESIS_COUPLED_PROTON_TRANSPORT                                  | 17   | -1.88984 | 0         | 0.016879  |
| GO_OXIDATIVE_PHOSPHORYLATION                                                             | 71   | -1.89153 | 0         | 0.017096  |
| GO_OXIDOREDUCTASE_ACTIVITY_ACTING_ON_NAD_P_H_QUINONE_OR_SIMILAR_COMPOUND_AS_ACCEPTOR     | 46   | -1.89245 | 0         | 0.017665  |
| GO_RESPIRATORY_CHAIN                                                                     | 67   | -1.85864 | 0         | 0.024454  |
| GO_ENERGY_COUPLED_PROTON_TRANSPORT_DOWN_ELECTROCHEMICAL_GRADIENT                         | 19   | -1.84973 | 0.001284  | 0.0257    |
| GO_NAD_BINDING                                                                           | 40   | -1.79873 | 0.001192  | 0.0429    |
| GO_REGULATION_OF_MITOCHONDRIAL_MEMBRANE_POTENTIAL                                        | 40   | -1.78476 | 0.001168  | 0.047952  |
| GO_MITOCHONDRIAL_TRANSMEMBRANE_TRANSPORT                                                 | 49   | -1.78605 | 0         | 0.04835   |
| GO_HYDROGEN_ION_TRANSMEMBRANE_TRANSPORT                                                  | 68   | -1.7771  | 0         | 0.049632  |
| GO_GLUTATHIONE_TRANSFERASE_ACTIVITY                                                      | 18   | -1.7785  | 0         | 0.049891  |
| GO_CELLULAR_RESPIRATION                                                                  | 123  | -1.7334  | 0         | 0.069382  |
| GO_PROTON_TRANSPORTING_TWO_SECTOR_ATPASE_COMPLEX                                         | 38   | -1.73439 | 0.001147  | 0.069692  |
| GO_CAMP_METABOLIC_PROCESS                                                                | 15   | 2.246914 | 0.004545  | 0.034514  |
| GO_OXIDOREDUCTASE_ACTIVITY_ACTING_ON_THE_CH_OH_GROUP_OF_DONORS_NAD_OR_NADP_AS_ACCEPTOR   | 63   | -1.68519 | 0.001088  | 0.108061  |
| GO_OXIDOREDUCTASE_ACTIVITY                                                               | 400  | -1.69481 | 0         | 0.10038   |
| GO_GTP_METABOLIC_PROCESS                                                                 | 16   | -1.73047 | 0.006477  | 0.070835  |
| GO_REGULATION_OF_CELLULAR_RESPONSE_TO_HEAT                                               | 64   | 2.013771 | 0         | 0.077292  |
| GO_OXIDOREDUCTASE_COMPLEX                                                                | 79   | -1.71882 | 0.001068  | 0.078704  |
| GO_HYDROLASE_ACTIVITY_ACTING_ON_CARBON_NITROGEN_BUT_NOT_PEPTIDE_BONDS_IN_CYCLIC_AMIDINES | 26   | -1.76669 | 0.004884  | 0.055173  |
| GO_TRANSFERASE_ACTIVITY_TRANSFERRING_ALKYL_OR_ARYL_OTHER_THAN_METHYL_GROUPS              | 44   | -1.76234 | 0         | 0.056343  |
| GO_PROTON_TRANSPORTING_ATP_SYNTHASE_COMPLEX                                              | 20   | -1.75673 | 0.001289  | 0.058445  |
| GO_GLYCOSYL_COMPOUND_METABOLIC_PROCESS                                                   | 261  | -1.71933 | 0         | 0.080813  |
| GO_GLYCOSYL_COMPOUND_BIOSYNTHETIC_PROCESS                                                | 91   | -1.71279 | 0         | 0.084428  |
| GO_NUCLEOCYTOPLASMIC_TRANSPORTER_ACTIVITY                                                | 22   | 1.986325 | 0         | 0.08588   |
| GO_AMMONIUM_ION_BINDING                                                                  | 19   | 2.028993 | 0         | 0.094029  |
| <b>RIBOSOME AND PROTEIN ORGANIZATION</b>                                                 |      |          |           |           |
| GO_CYTOSOLIC_LARGE_RIBOSOMAL_SUBUNIT                                                     | 55   | -1.97672 | 0         | 0.008941  |
| GO_PROTEIN_TARGETING_TO_MEMBRANE                                                         | 132  | -1.90806 | 0         | 0.015275  |
| GO_STRUCTURAL_CONSTITUENT_OF_RIBOSOME                                                    | 188  | -1.8801  | 0         | 0.018291  |
| GO_PROTEIN_REFOLDING                                                                     | 20   | 2.586325 | 0         | 0         |
| GO_CYTOSOLIC_RIBOSOME                                                                    | 98   | -2.08889 | 0         | 0.001523  |
| GO_TRANSLATIONAL_INITIATION                                                              | 136  | -2.00724 | 0         | 0.004828  |
| GO_NUCLEOSIDE_MONOPHOSPHATE_BIOSYNTHETIC_PROCESS                                         | 63   | -2.02115 | 0         | 0.005115  |
| GO_PROTEIN_LOCALIZATION_TO_ENDOPLASMIC_RETICULUM                                         | 113  | -1.97406 | 0         | 0.007482  |
| GO_RIBONUCLEOSIDE_TRIPHOSPHATE_BIOSYNTHETIC_PROCESS                                      | 39   | -1.98801 | 0         | 0.007885  |
| GO_ESTABLISHMENT_OF_PROTEIN_LOCALIZATION_TO_ENDOPLASMIC_RETICULUM                        | 99   | -1.97001 | 0         | 0.008004  |
| GO_RIBOSOME                                                                              | 202  | -1.83056 | 0         | 0.031554  |
| GO_RIBOSOMAL_SUBUNIT                                                                     | 151  | -1.82886 | 0         | 0.031651  |
| GO_PEPTIDE_METABOLIC_PROCESS                                                             | 435  | -1.74206 | 0         | 0.067685  |
| GO_LARGE_RIBOSOMAL_SUBUNIT                                                               | 87   | -1.73534 | 0.001079  | 0.069745  |
| GO_MONOSACCHARIDE_CATABOLIC_PROCESS                                                      | 41   | -1.71921 | 0.001166  | 0.079588  |
| <b>NUCLEOSIDE SYNTHESIS</b>                                                              |      |          |           |           |
| GO_NUCLEOSIDE_TRIPHOSPHATE_BIOSYNTHETIC_PROCESS                                          | 47   | -1.97595 | 0         | 0.008138  |
| GO PURINE NUCLEOSIDE MONOPHOSPHATE BIOSYNTHETIC PROCESS                                  | 47   | -2.11791 | 0         | 9.11E-04  |
| GO_NUCLEAR_TRANSCRIBED_MRNA_CATABOLIC_PROCESS_NONSENSE_MEDIATED_DECAY                    | 112  | -1.85323 | 0         | 0.025229  |
| GO_PURINE_NUCLEOSIDE_BIOSYNTHETIC_PROCESS                                                | 67   | -1.8541  | 0         | 0.025607  |
| GO_PURINE_CONTAINING_COMPOUND_BIOSYNTHETIC_PROCESS                                       | 89   | -1.83465 | 0         | 0.030567  |
| GO_NUCLEOSIDE_TRIPHOSPHATE_METABOLIC_PROCESS                                             | 169  | -1.81471 | 0         | 0.036301  |
| GO_NUCLEOSIDE_MONOPHOSPHATE_METABOLIC_PROCESS                                            | 181  | -1.8077  | 0         | 0.039335  |
| GO_CYTOSOLIC_SMALL_RIBOSOMAL_SUBUNIT                                                     | 40   | -1.80487 | 0         | 0.040153  |
| GO_NUCLEOSIDE_PHOSPHATE_BIOSYNTHETIC_PROCESS                                             | 121  | -1.76432 | 0         | 0.055888  |
| <b>MOTILITY AND CELLULAR FUNCTION</b>                                                    |      |          |           |           |
| GO_CORTICAL_ACTIN_CYTOSKELETON                                                           | 32   | -1.88011 | 0         | 0.018986  |
| GO_CELLULAR_RESPONSE_TO_CALCIIUM_ION                                                     | 30   | -1.78688 | 0         | 0.048909  |
| GO_REGULATION_OF_MYELOID_CELL_APOPTOTIC_PROCESS                                          | 18   | -1.74066 | 0.0013    | 0.06633   |
| GO_CELL_CELL_CONTACT_ZONE                                                                | 30   | -1.74198 | 0         | 0.066563  |
| GO_NECROPTOTIC_PROCESS                                                                   | 18   | 2.021373 | 0         | 0.084175  |
| GO_NEGATIVE_REGULATION_OF_ACTIN_FILAMENT_POLYMERIZATION                                  | 23   | -1.69787 | 0.001259  | 0.098417  |

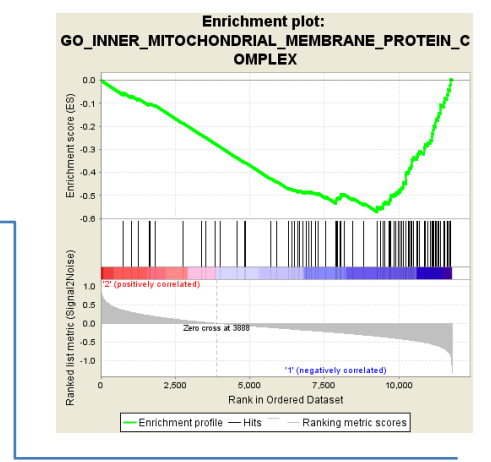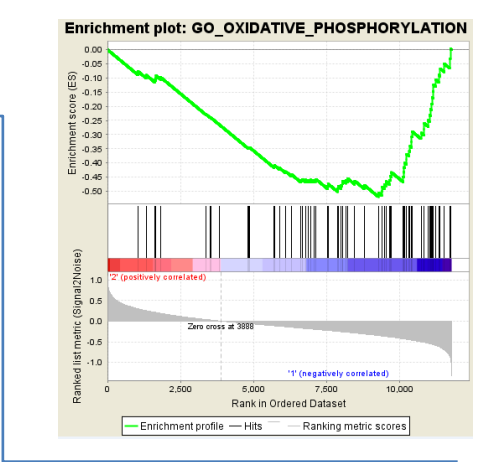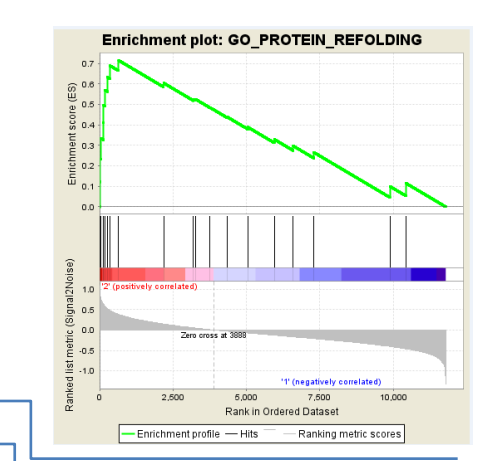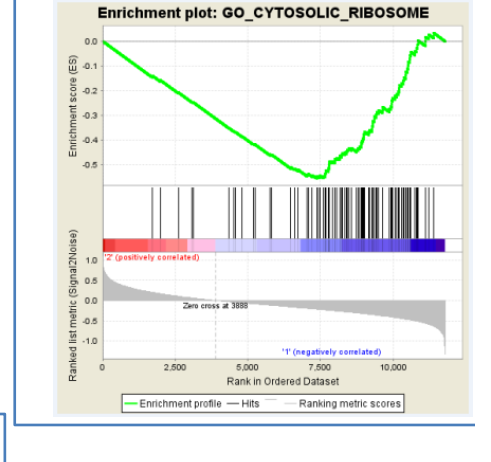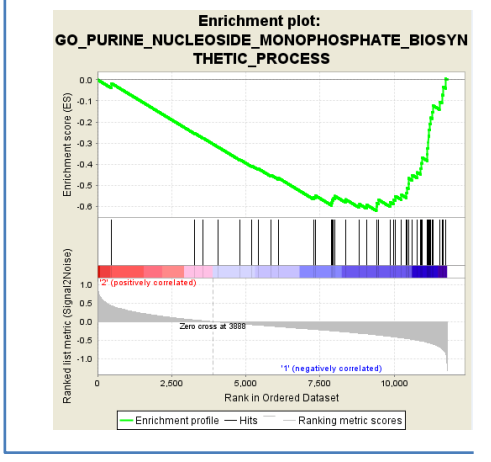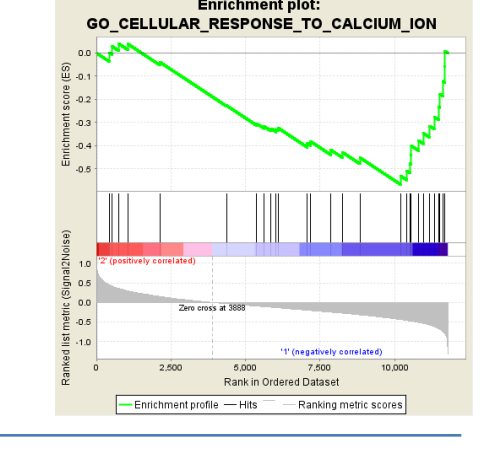

**Supplementary Figure 2**

**GSEA (Gene Set enrichment analysis).** List of enriched gene sets in NK-cells from patients with HCC and LC, identified by GSEA (MSigDB, C5 gene Ontology set), and divided in four distinct functions (Mitochondrial Dysfunction, Ribosome and protein organization, Nucleoside synthesis and motility and cellular function). Representative enrichment plots are shown on the right.
