# Supplementary material
Source: PubMed Central journal article supplement (PMC11027621)
Supplement: 262_2020_2561_MOESM3_ESM.pdf [file 262_2020_2561_MOESM3_ESM.pdf]

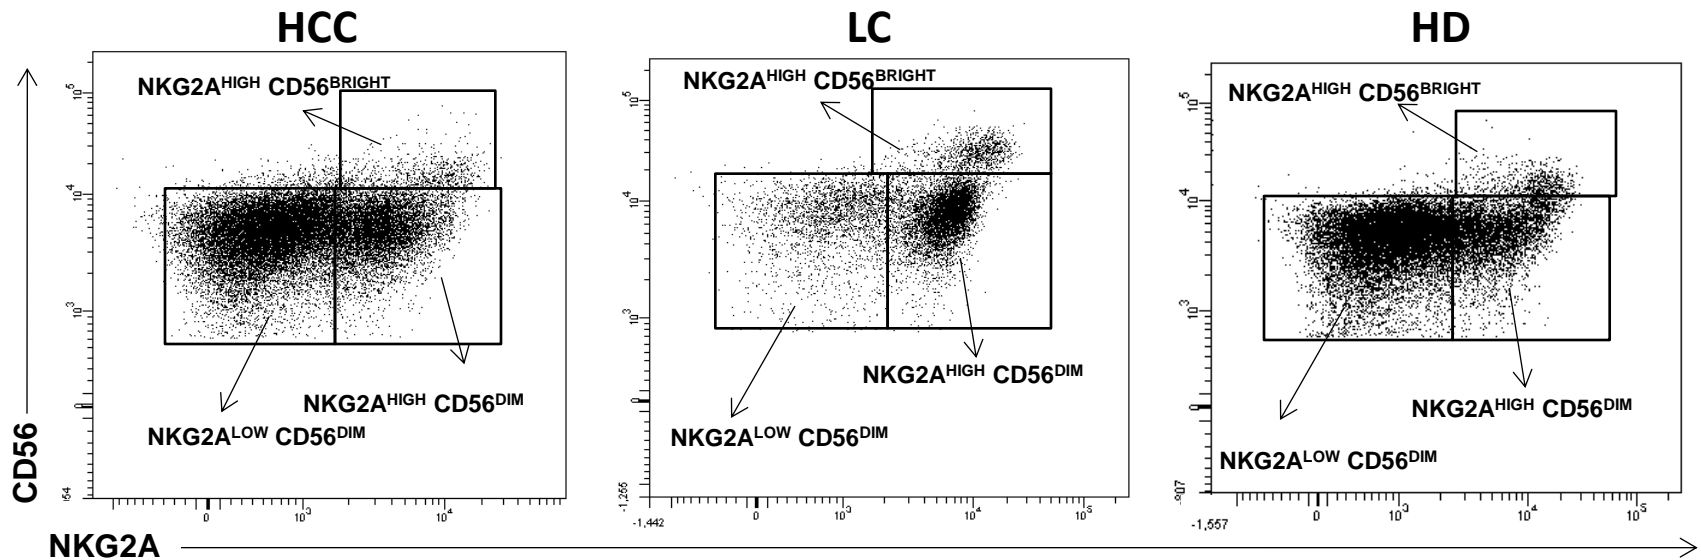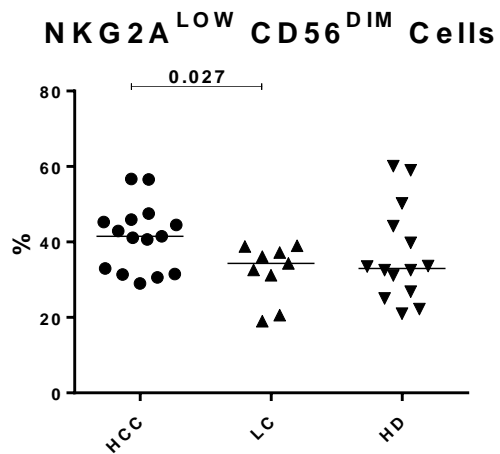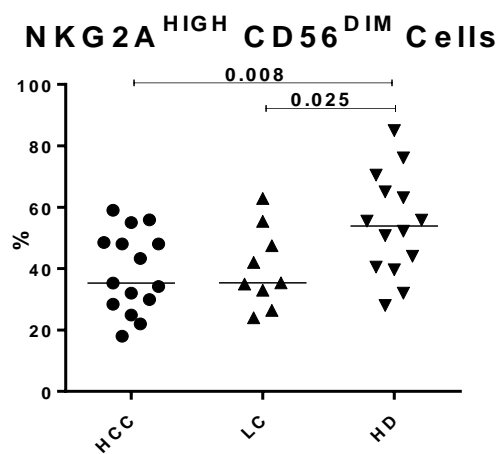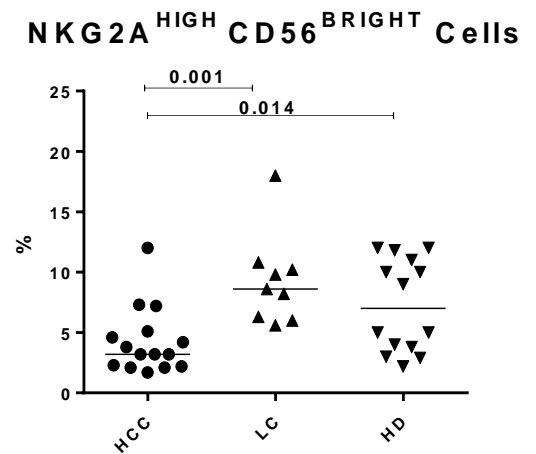

### Supplementary Figure 3

**NK-cells subsets with the maturation marker NKG2A.** **A:** Patients PBMCs were stained with anti-CD3, anti-CD56 and anti-NKG2A. NK-cells were then gated for quantification of three subsets based on NKG2A surface density. Flow cytometry dot plots show representative example of NKG2A expression in HCC, LC and HD patients. **B:** Graphs represent the comparison of the frequency of NK-cells belonging to each subsets of NKG2A<sup>LOW</sup>CD56<sup>DIM</sup>, NKG2A<sup>HIGH</sup>CD56<sup>DIM</sup> and NKG2A<sup>HIGH</sup>CD56<sup>BRIGHT</sup>. Horizontal lines represent median values. Differences between multiple groups were evaluated by the Kruskal-Wallis test; p values were corrected for pairwise multiple comparisons by the Dunn's test.
