# Supplementary material
Source: PubMed Central journal article supplement (PMC11027621)
Supplement: 262_2020_2561_MOESM4_ESM.pdf [file 262_2020_2561_MOESM4_ESM.pdf]

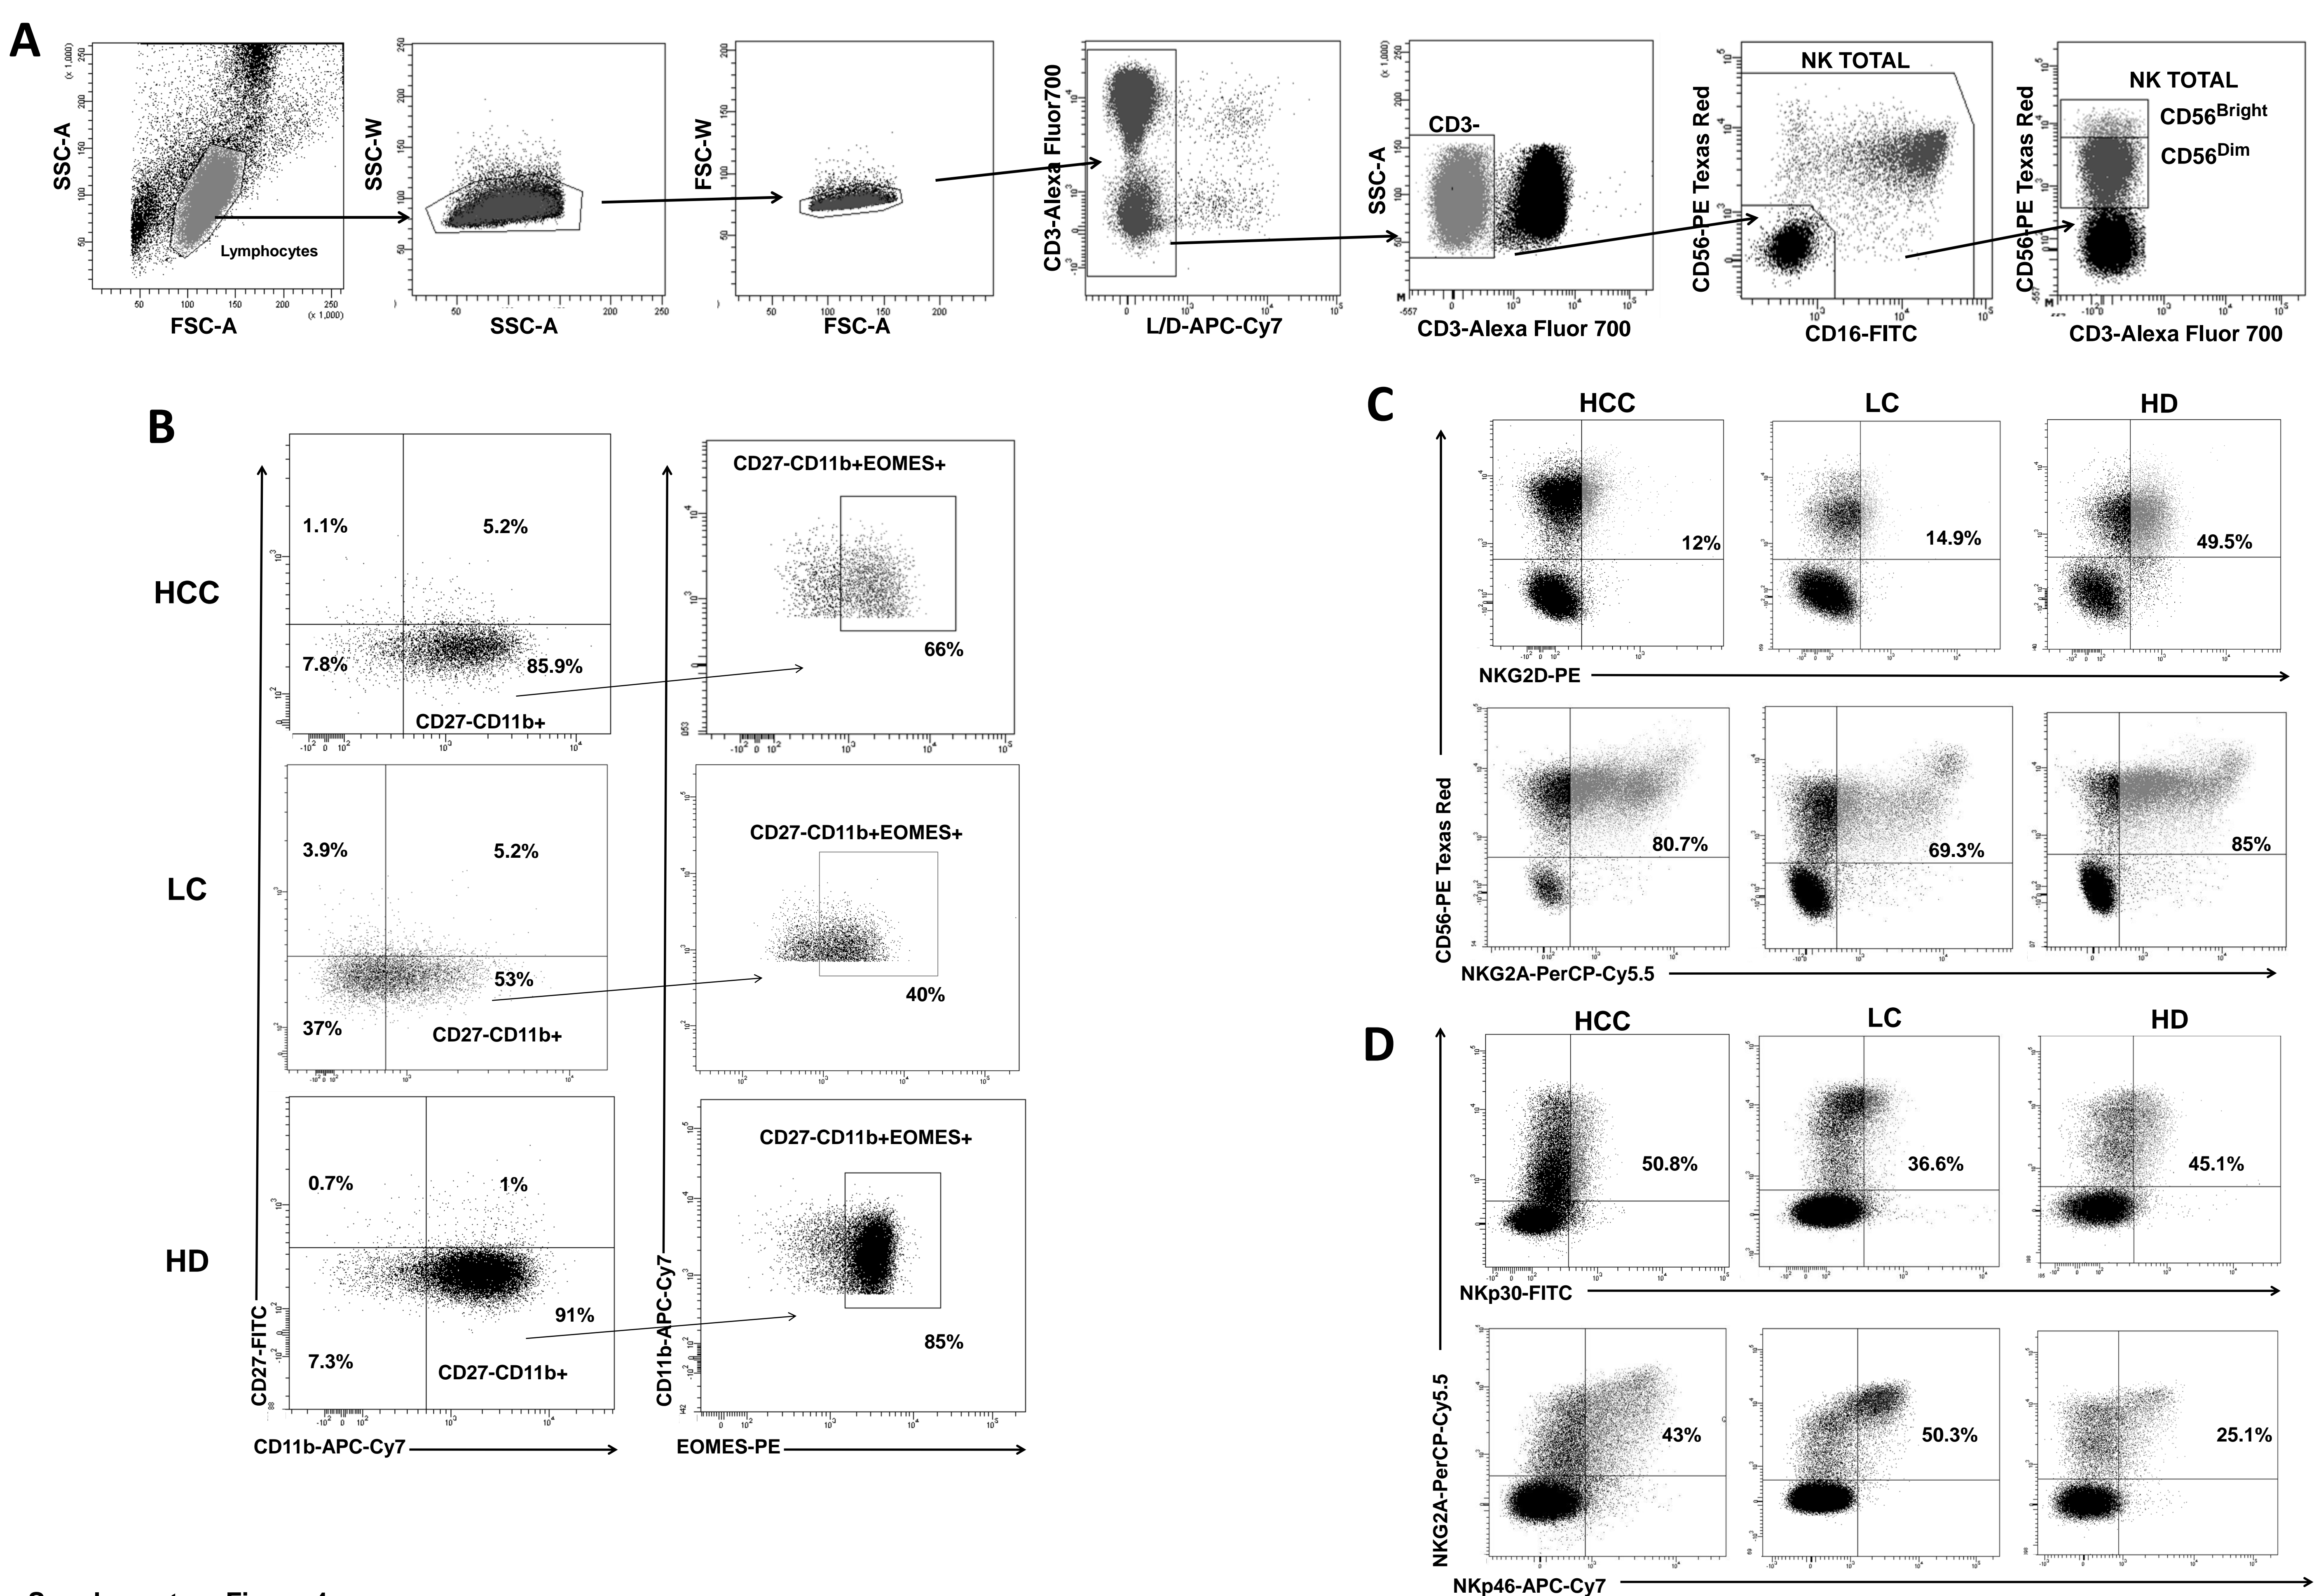

**Supplementary Figure 4**

**Flow cytometric analysis representative dot plots. A:** Gating strategy for the identification of NK-cells (Lymphocytes, singlets, live cells, CD3-, NK total, CD56<sup>BRIGHT</sup> and CD56<sup>DIM</sup>) using multicolor flow cytometry. **B:** Dot plots representing analysis of CD27, CD11b and EOMES expressions in the study groups. **C:** Flow cytometry dot plots show representative example of NKG2D (upper panels) and NKG2A (lower panels) staining. **D:** Dot plots show NKG2A/NKp30 (upper panels) and NKG2A/NKp46 (lower panels) co-expression in NK cells from HCC and LC patients and HD.
