# Supplementary material
Source: PubMed Central journal article supplement (PMC11027621)
Supplement: 262_2020_2561_MOESM6_ESM.pdf [file 262_2020_2561_MOESM6_ESM.pdf]

## A Mitochondrial membrane potential analysis by JC-1

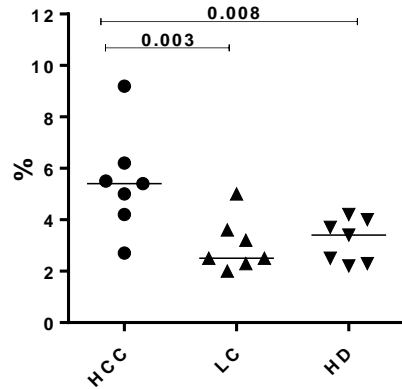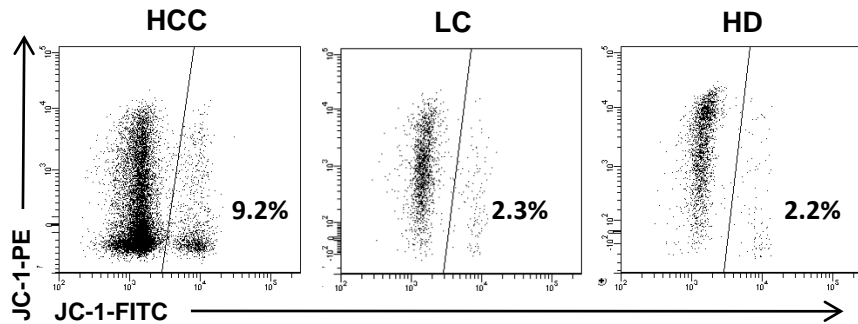

## B

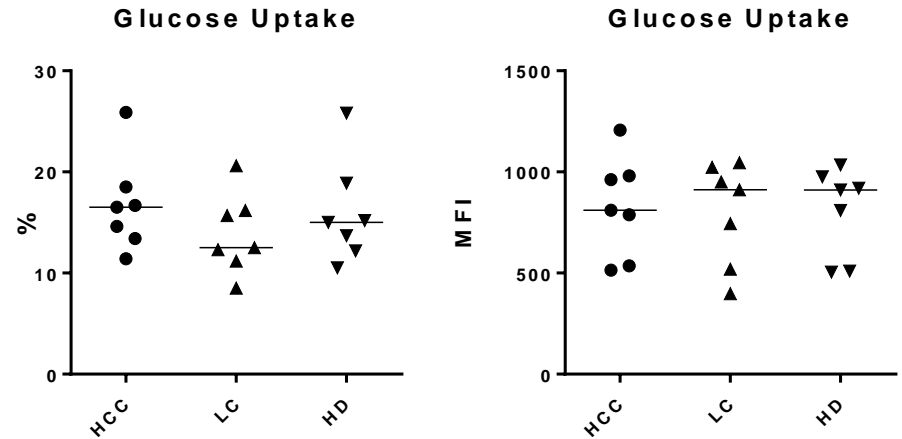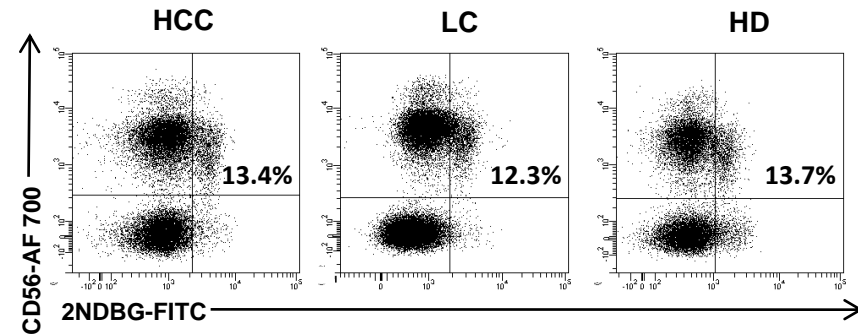

### Supplementary Figure 6.

**Metabolic analysis in NK-cells from study groups.** **A.** Mitochondrial membrane potential was measured on NK-cells from different study groups by the potentiometric probe JC-1. After surface staining with anti-CD3 and anti-CD56, PBMCs were incubated with JC-1. Samples were then stained with the viability probe 7-AAD and acquired on flow cytometer. Depolarized NK-cells were quantified by the percentage of FL1high/FL2low cells (JC-1 staining) detected in the different groups (upper panel). Representative dot plots (lower panels on the left side) show modulation of depolarized NK-cells in the study groups.

**B.** Glucose uptake assay was evaluated on NK-cells from HCC, LC patients and HD. PBMCs were stained with the glucose analog 2-NBDG (2-deoxy-2-[(7-nitro-2,1,3-benzoxadiazol-4-yl) amino]-D-glucose, 40  $\mu$ M). Frequency of 2-NBDG NK-cells (upper left panel) and Median Fluorescence Intensity (MFI, upper right panel) were measured in different study groups. Lower panels show 2-NBDG expression.

Differences between multiple groups were evaluated by the non-parametric Kruskal-Wallis test; p values were corrected for pairwise multiple comparisons by the Dunn's test.
