# Supplementary material
Source: PubMed Central journal article supplement (PMC11027621)
Supplement: 262_2020_2561_MOESM7_ESM.pdf [file 262_2020_2561_MOESM7_ESM.pdf]

Supplementary Table 1A

## C2-Canonical Pathway

## LC vs HD

| NAME                                                                                                                        | SIZE | NES    | NOM p-val | FDR q-val |
|-----------------------------------------------------------------------------------------------------------------------------|------|--------|-----------|-----------|
| KEGG_AMINO_SUGAR_AND_NUCLEOTIDE_SUGAR_METABOLISM                                                                            | 37   | 2.087  | 0.000     | 0.004     |
| REACTOME_BIOSYNTHESIS_OF_THE_N_GLYCAN_PRECURSOR_DOLICHOL_LIPID_LINKED_OLIGOSACCHARIDE_LLO_AND_TRANSFER_TO_A_NASCENT_PROTEIN | 26   | 2.031  | 0.000     | 0.007     |
| REACTOME_PURINE_METABOLISM                                                                                                  | 23   | 1.980  | 0.001     | 0.009     |
| REACTOME_METABOLISM_OF_NUCLEOTIDES                                                                                          | 53   | 1.992  | 0.000     | 0.009     |
| REACTOME_TCA_CYCLE_AND_RESPIRATORY_ELECTRON_TRANSPORT                                                                       | 120  | 1.944  | 0.000     | 0.010     |
| REACTOME_GLUCOSE_METABOLISM                                                                                                 | 52   | 1.935  | 0.000     | 0.010     |
| KEGG_PENTOSE_PHOSPHATE_PATHWAY                                                                                              | 21   | 1.951  | 0.000     | 0.010     |
| PID_INTEGRIN3_PATHWAY                                                                                                       | 16   | -2.279 | 0.000     | 0.011     |
| REACTOME_RESPIRATORY_ELECTRON_TRANSPORT_ATP_SYNTHESIS_BY_CHEMIOSMOTIC_COUPLING_AND_HEAT_PRODUCTION_BY_UNCOUPLING_PROTEINS_  | 88   | 1.955  | 0.000     | 0.012     |
| KEGG_OXIDATIVE_PHOSPHORYLATION                                                                                              | 108  | 1.914  | 0.000     | 0.012     |
| REACTOME_METABOLISM_OF_AMINO_ACIDS_AND_DERIVATIVES                                                                          | 120  | 1.903  | 0.000     | 0.014     |
| REACTOME_AUTODEGRADATION_OF_CDH1_BY_CDH1_APC_C                                                                              | 54   | 1.876  | 0.000     | 0.015     |
| KEGG_ALZHEIMERS_DISEASE                                                                                                     | 132  | 1.872  | 0.000     | 0.015     |
| KEGG_PEROXISOME                                                                                                             | 57   | 1.878  | 0.000     | 0.016     |
| REACTOME_GLUCCONEOGENESIS                                                                                                   | 24   | 1.863  | 0.000     | 0.016     |
| REACTOME_FORMATION_OF_ATP_BY_CHEMIOSMOTIC_COUPLING                                                                          | 15   | 1.878  | 0.003     | 0.017     |
| KEGG_PYRIMIDINE_METABOLISM                                                                                                  | 79   | 1.857  | 0.000     | 0.017     |
| KEGG_FRUCTOSE_AND_MANNANOSE_METABOLISM                                                                                      | 26   | 1.851  | 0.001     | 0.018     |
| REACTOME_SCSK2_MEDIATED_DEGRADATION_OF_P27_P21                                                                              | 49   | 1.846  | 0.000     | 0.018     |
| REACTOME_AUTODEGRADATION_OF_THE_E3_UBIQUITIN_LIGASE_COP1                                                                    | 46   | 1.879  | 0.001     | 0.018     |
| REACTOME_POST_TRANSLATIONAL_PROTEIN_MODIFICATION                                                                            | 114  | 1.841  | 0.000     | 0.019     |
| REACTOME_APC_C_CDH1_MEDIATED_DEGRADATION_OF_CDC20_AND_OTHER_APC_C_CDH1_TARGETED_PROTEINS_IN_LATE_MITOSIS_EARLY_G1           | 58   | 1.818  | 0.001     | 0.019     |
| KEGG_PURINE_METABOLISM                                                                                                      | 102  | 1.827  | 0.000     | 0.019     |
| REACTOME_DARPP_32_EVENTS                                                                                                    | 21   | 1.823  | 0.000     | 0.020     |
| REACTOME_P53_DEPENDENT_G1_DNA_DAMAGE_RESPONSE                                                                               | 50   | 1.819  | 0.000     | 0.020     |
| KEGG_PARKINSONS_DISEASE                                                                                                     | 105  | 1.828  | 0.000     | 0.020     |
| REACTOME_GLYCEROPHOSPHOLIPID_BIOSYNTHESIS                                                                                   | 50   | 1.805  | 0.002     | 0.020     |
| REACTOME_RESPIRATORY_ELECTRON_TRANSPORT                                                                                     | 71   | 1.807  | 0.000     | 0.020     |
| REACTOME_MITOCHONDRIAL_PROTEIN_IMPORT                                                                                       | 44   | 1.829  | 0.001     | 0.021     |
| REACTOME_CDT1_ASSOCIATION_WITH_THE_CDC6_ORC_ORIGIN_COMPLEX                                                                  | 46   | 1.808  | 0.000     | 0.021     |
| KEGG_COMPLEMENT_AND_COAGULATION_CASCADES                                                                                    | 18   | -2.149 | 0.000     | 0.022     |
| KEGG_N_GLYCAN_BIOSYNTHESIS                                                                                                  | 40   | 1.799  | 0.000     | 0.022     |
| KEGG_PROTEASOME                                                                                                             | 41   | 1.787  | 0.000     | 0.022     |
| KEGG_HUNTINGTONS_DISEASE                                                                                                    | 145  | 1.788  | 0.000     | 0.022     |
| REACTOME_P53_INDEPENDENT_G1_S_DNA_DAMAGE_CHECKPOINT                                                                         | 46   | 1.790  | 0.000     | 0.023     |
| REACTOME_REGULATION_OF_ORNITHINE_DECARBOXYLASE_ODC                                                                          | 45   | 1.792  | 0.000     | 0.023     |
| REACTOME_BRANCHED_CHAIN_AMINO_ACID_CATABOLISM                                                                               | 16   | 1.779  | 0.006     | 0.024     |
| BIOCARTA_ACTINY_PATHWAY                                                                                                     | 15   | 1.770  | 0.001     | 0.026     |
| REACTOME_CELL_CYCLE_CHECKPOINTS                                                                                             | 89   | 1.756  | 0.000     | 0.029     |
| REACTOME_ANTIGEN_PROCESSING_UBIQUITINATION_PROTEASOME_DEGRADATION                                                           | 171  | 1.758  | 0.000     | 0.030     |
| REACTOME_CROSS_PRESENTATION_OF_SOLUBLE_EXOGENOUS_ANTIGENS_ENDOSOMES                                                         | 43   | 1.756  | 0.001     | 0.030     |
| KEGG_VALINE_LEUCINE_AND_ISOLEUCINE_DEGRADATION                                                                              | 38   | 1.750  | 0.001     | 0.031     |
| REACTOME_CYCLIN_E_ASSOCIATED_EVENTS_DURING_G1_S_TRANSITION_                                                                 | 57   | 1.746  | 0.001     | 0.031     |
| REACTOME_CDK_MEDIATED_PHOSPHORYLATION_AND_REMOVAL_OF_CDC6                                                                   | 44   | 1.737  | 0.002     | 0.034     |
| KEGG_GLYCOLYSIS_GLUCCONEOGENESIS                                                                                            | 40   | 1.730  | 0.001     | 0.035     |
| REACTOME_VIF_MEDIATED_DEGRADATION_OF_APOBEC3G                                                                               | 48   | 1.731  | 0.001     | 0.035     |
| REACTOME_ASPARAGINE_N_LINKED_GLYCOSYLATION                                                                                  | 65   | 1.732  | 0.002     | 0.035     |
| REACTOME_APC_C_CDC20_MEDIATED_DEGRADATION_OF_MITOTIC_PROTEINS                                                               | 60   | 1.726  | 0.000     | 0.036     |
| REACTOME_G1_S_TRANSITION                                                                                                    | 88   | 1.722  | 0.000     | 0.037     |
| REACTOME_TRNA_AMINOACYLATION                                                                                                | 36   | 1.720  | 0.000     | 0.037     |
| REACTOME_S_PHASE                                                                                                            | 86   | 1.723  | 0.000     | 0.037     |
| KEGG_PROPANOATE_METABOLISM                                                                                                  | 26   | 1.716  | 0.002     | 0.038     |
| REACTOME_SULFUR_AMINO_ACID_METABOLISM                                                                                       | 17   | 1.710  | 0.007     | 0.040     |
| REACTOME_REGULATION_OF_APOPTOSIS                                                                                            | 51   | 1.706  | 0.003     | 0.041     |
| KEGG_GLYCOSYLPHOSPHATIDYLINOSITOL_GPI_ANCHOR_BIOSYNTHESIS                                                                   | 19   | 1.703  | 0.003     | 0.042     |
| REACTOME_MITOTIC_G1_G1_S_PHASES                                                                                             | 107  | 1.698  | 0.000     | 0.044     |
| REACTOME_M_G1_TRANSITION                                                                                                    | 67   | 1.689  | 0.000     | 0.048     |
| BIOCARTA_IL2_PATHWAY                                                                                                        | 19   | 1.681  | 0.014     | 0.051     |
| REACTOME_SYNTHESIS_OF_DNA                                                                                                   | 73   | 1.671  | 0.003     | 0.054     |
| REACTOME_ORC1_REMOVAL_FROM_CHROMATIN                                                                                        | 54   | 1.669  | 0.002     | 0.054     |
| REACTOME_PYRIMIDINE_METABOLISM                                                                                              | 16   | 1.668  | 0.007     | 0.054     |
| REACTOME_SCF_BETA_TRCP_MEDIATED_DEGRADATION_OF_EMI1                                                                         | 48   | 1.671  | 0.001     | 0.055     |
| REACTOME_SIGNALING_BY_WNT                                                                                                   | 62   | 1.672  | 0.001     | 0.056     |
| REACTOME_CLASS_I_MHC_MEDIATED_ANTIGEN_PROCESSING_PRESENTATION                                                               | 203  | 1.664  | 0.000     | 0.056     |

|                                                                                                         |     |        |       |       |
|---------------------------------------------------------------------------------------------------------|-----|--------|-------|-------|
| REACTOME_DESTABILIZATION_OF_MRNA_BY_AUF1_HNRNP_DO                                                       | 49  | 1.659  | 0.001 | 0.057 |
| REACTOME_REGULATION_OF_MITOTIC_CELL_CYCLE                                                               | 67  | 1.654  | 0.002 | 0.058 |
| REACTOME_ASSEMBLY_OF_THE_PRE_REPLICATIVE_COMPLEX                                                        | 55  | 1.654  | 0.003 | 0.059 |
| BIOCARTA_PGC1A_PATHWAY                                                                                  | 15  | 1.651  | 0.011 | 0.059 |
| KEGG_AMINOACYL_TRNA_BIOSYNTHESIS                                                                        | 36  | 1.654  | 0.002 | 0.060 |
| BIOCARTA_MPR_PATHWAY                                                                                    | 22  | 1.646  | 0.004 | 0.062 |
| REACTOME_POST_TRANSLATIONAL_MODIFICATION_SYNTHESIS_OF_GPI_ANCHORED_PROTEINS                             | 20  | 1.642  | 0.009 | 0.063 |
| REACTOME_NEF_MEDIATES_DOWN_MODULATION_OF_CELL_SURFACE_RECEPTORS_BY_RECRUITING_THEM_TO_CLATHRIN_ADAPTERS | 17  | 1.642  | 0.014 | 0.064 |
| REACTOME_GLYCOSPHINGOLIPID_METABOLISM                                                                   | 22  | 1.626  | 0.011 | 0.072 |
| KEGG_PYRUVATE_METABOLISM                                                                                | 30  | 1.624  | 0.011 | 0.073 |
| REACTOME_DOUBLE_STRAND_BREAK_REPAIR                                                                     | 18  | 1.626  | 0.009 | 0.073 |
| REACTOME_CITRIC_ACID_CYCLE_TCA_CYCLE                                                                    | 19  | 1.615  | 0.020 | 0.077 |
| REACTOME_DNA_REPAIR                                                                                     | 90  | 1.616  | 0.002 | 0.078 |
| REACTOME_OLFACTORY_SIGNALING_PATHWAY                                                                    | 16  | -1.973 | 0.000 | 0.084 |
| KEGG_TYROSINE_METABOLISM                                                                                | 19  | 1.603  | 0.023 | 0.085 |
| KEGG_CYSTEINE_AND_METHIONINE_METABOLISM                                                                 | 24  | 1.606  | 0.005 | 0.085 |
| REACTOME_METABOLISM_OF_PROTEINS                                                                         | 337 | 1.604  | 0.000 | 0.086 |
| REACTOME_OPIOID_SIGNALING                                                                               | 50  | 1.588  | 0.006 | 0.095 |
| BIOCARTA_BCR_PATHWAY                                                                                    | 30  | 1.589  | 0.010 | 0.096 |
| ST_TUMOR_NECROSIS_FACTOR_PATHWAY                                                                        | 27  | -1.923 | 0.011 | 0.100 |
| KEGG_GALACTOSE_METABOLISM                                                                               | 19  | 1.577  | 0.024 | 0.102 |
| REACTOME_LAGGING_STRAND_SYNTHESIS                                                                       | 17  | 1.577  | 0.022 | 0.103 |
| REACTOME_PHASE_II_CONJUGATION                                                                           | 28  | 1.578  | 0.011 | 0.104 |
| REACTOME_RNA_POL_III_TRANSCRIPTION_INITIATION_FROM_TYPE_3_PROMOTER                                      | 24  | 1.571  | 0.016 | 0.108 |
| REACTOME_THE_ROLE_OF_NEF_IN_HIV1_REPLICATION_AND_DISEASE_PATHOGENESIS                                   | 24  | 1.566  | 0.024 | 0.111 |
| REACTOME_ERK_MAPK_TARGETS                                                                               | 19  | 1.564  | 0.022 | 0.112 |
| REACTOME_G1_PHASE                                                                                       | 31  | 1.561  | 0.017 | 0.113 |
| KEGG_STARCH_AND_SUCROSE_METABOLISM                                                                      | 18  | 1.553  | 0.025 | 0.114 |
| REACTOME_MITOCHONDRIAL_TRNA_AMINOACYLATION                                                              | 17  | 1.561  | 0.031 | 0.114 |
| KEGG_GLUTATHIONE_METABOLISM                                                                             | 31  | 1.558  | 0.015 | 0.114 |
| REACTOME_METABOLISM_OF_CARBOHYDRATES                                                                    | 148 | 1.552  | 0.001 | 0.115 |
| REACTOME_E2F_MEDIATED_REGULATION_OF_DNA_REPLICATION                                                     | 20  | 1.557  | 0.023 | 0.115 |
| BIOCARTA_G1_PATHWAY                                                                                     | 21  | 1.554  | 0.016 | 0.115 |
| PID_PS1_PATHWAY                                                                                         | 34  | 1.555  | 0.018 | 0.115 |
| REACTOME_LYSOSOME_VESICLE_BIOGENESIS                                                                    | 19  | 1.550  | 0.018 | 0.116 |
| REACTOME_ACTIVATED_NOTCH1_TRANSMITS_SIGNAL_TO_THE_NUCLEUS                                               | 21  | 1.544  | 0.025 | 0.121 |
| REACTOME_RESOLUTION_OF_AP_SITES_VIA_THE_MULTIPLE_NUCLEOTIDE_PATCH_REPLACEMENT_PATHWAY                   | 16  | 1.536  | 0.030 | 0.129 |
| REACTOME_SYNTHESIS_AND_INTERCONVERSION_OF_NUCLEOTIDE_DI_AND_TRIPHOSPHATES                               | 15  | 1.528  | 0.034 | 0.137 |
| BIOCARTA_NDKDYNAMIN_PATHWAY                                                                             | 16  | 1.526  | 0.027 | 0.139 |
| KEGG_NOTCH_SIGNALING_PATHWAY                                                                            | 34  | 1.521  | 0.026 | 0.140 |
| PID_FOXM1_PATHWAY                                                                                       | 24  | 1.521  | 0.030 | 0.142 |
| REACTOME_PEROXISOMAL_LIPID_METABOLISM                                                                   | 16  | 1.519  | 0.039 | 0.142 |
| PID_ALK1_PATHWAY                                                                                        | 16  | 1.522  | 0.033 | 0.143 |
| REACTOME_INTERFERON_ALPHA_BETA_SIGNALING                                                                | 46  | 1.510  | 0.018 | 0.153 |
| KEGG_CITRATE_CYCLE_TCA_CYCLE                                                                            | 27  | 1.507  | 0.037 | 0.156 |
| REACTOME_BASE_EXCISION_REPAIR                                                                           | 18  | 1.505  | 0.029 | 0.157 |
| REACTOME_ACTIVATION_OF_KAINATE_RECEPTORS_UPON_Glutamate_BINDING                                         | 18  | 1.498  | 0.043 | 0.165 |
| NABA_MATRISOME                                                                                          | 285 | -1.761 | 0.000 | 0.166 |
| ST_ADRENERGIC                                                                                           | 20  | -1.774 | 0.010 | 0.174 |
| REACTOME_DOWNREGULATION_OF_SMAD2_3_SMAD4_TRANSCRIPTIONAL_ACTIVITY                                       | 17  | -1.611 | 0.014 | 0.174 |
| PID_INTEGRIN1_PATHWAY                                                                                   | 27  | -1.616 | 0.016 | 0.176 |
| BIOCARTA_CCR3_PATHWAY                                                                                   | 15  | 1.488  | 0.040 | 0.178 |
| NABA_BASEMENT_MEMBRANES                                                                                 | 15  | -1.641 | 0.017 | 0.179 |
| REACTOME_APOPTOTIC_EXECUTION_PHASE                                                                      | 35  | -1.698 | 0.000 | 0.180 |
| KEGG_PORPHYRIN_AND_CHLOROPHYLL_METABOLISM                                                               | 20  | 1.483  | 0.049 | 0.184 |
| NABA_CORE_MATRISOME                                                                                     | 71  | -1.626 | 0.000 | 0.185 |
| BIOCARTA_TNFR2_PATHWAY                                                                                  | 16  | -1.616 | 0.041 | 0.186 |
| PID_CD40_PATHWAY                                                                                        | 23  | -1.705 | 0.016 | 0.189 |
| REACTOME_DNA_STRAND_ELONGATION                                                                          | 25  | 1.478  | 0.048 | 0.190 |
| BIOCARTA_P53HYPOXIA_PATHWAY                                                                             | 19  | -1.641 | 0.014 | 0.191 |
| KEGG_RNA_DEGRADATION                                                                                    | 52  | 1.476  | 0.032 | 0.191 |
| PID_FRA_PATHWAY                                                                                         | 20  | -1.651 | 0.019 | 0.191 |
| NABA_SECRETED_FACTORS                                                                                   | 88  | -1.718 | 0.000 | 0.193 |
| KEGG_RNA_POLYMERASE                                                                                     | 27  | 1.474  | 0.047 | 0.193 |
| NABA_ECM_AFFILIATED                                                                                     | 56  | -1.780 | 0.000 | 0.196 |
| REACTOME_PYRUVATE_METABOLISM_AND_CITRIC_ACID_TCA_CYCLE                                                  | 36  | 1.470  | 0.043 | 0.197 |
| KEGG_CYTOKINE_CYTOKINE_RECEPTOR_INTERACTION                                                             | 101 | -1.586 | 0.000 | 0.197 |
| PID_TCTP_PATHWAY                                                                                        | 30  | -1.573 | 0.031 | 0.205 |
| NABA_ECM_GLYCOPROTEINS                                                                                  | 50  | -1.664 | 0.009 | 0.205 |
| REACTOME_CLASS_B_2_SECRETIN_FAMILY_RECEPTORS                                                            | 30  | -1.652 | 0.000 | 0.206 |
| KEGG_ECM_RECEPTOR_INTERACTION                                                                           | 31  | -1.794 | 0.006 | 0.210 |

|                                                                    |     |        |       |       |
|--------------------------------------------------------------------|-----|--------|-------|-------|
| BIOCARTA_TID_PATHWAY                                               | 15  | 1.458  | 0.066 | 0.216 |
| REACTOME_RNA_POL_III_TRANSCRIPTION_TERMINATION                     | 16  | 1.453  | 0.060 | 0.220 |
| BIOCARTA_IL1R_PATHWAY                                              | 26  | -1.551 | 0.018 | 0.222 |
| REACTOME_RNA_POL_III_CHAIN_ELONGATION                              | 15  | 1.454  | 0.054 | 0.222 |
| BIOCARTA_AT1R_PATHWAY                                              | 26  | 1.453  | 0.041 | 0.222 |
| REACTOME_GLOBAL_GENOMIC_NER_GG_NER                                 | 27  | 1.448  | 0.050 | 0.223 |
| PID_TCR_CALCIIUM_PATHWAY                                           | 20  | 1.449  | 0.049 | 0.224 |
| REACTOME_EXTENSION_OF_TELOMERES                                    | 21  | 1.448  | 0.050 | 0.225 |
| REACTOME_IL_2_SIGNALING                                            | 30  | 1.444  | 0.040 | 0.228 |
| REACTOME_SPHINGOLIPID_METABOLISM                                   | 38  | 1.438  | 0.046 | 0.234 |
| REACTOME_PROCESSING_OF_CAPPED_INTRONLESS_PRE_MRNA                  | 19  | 1.439  | 0.058 | 0.235 |
| REACTOME_ACTIVATION_OF_NF_KAPPAB_IN_B_CELLS                        | 58  | 1.438  | 0.033 | 0.236 |
| NABA_MATRISOME_ASSOCIATED                                          | 214 | -1.531 | 0.000 | 0.241 |
| REACTOME_ER_PHAGOSOME_PATHWAY                                      | 57  | 1.429  | 0.040 | 0.248 |
| REACTOME_NUCLEAR_EVENTS_KINASE_AND_TRANSCRIPTION_FACTOR_ACTIVATION | 22  | 1.428  | 0.054 | 0.248 |

### HCC vs HD

| NAME                                                                                                                         | SIZE | NES    | NOM p-val | FDR q-val |
|------------------------------------------------------------------------------------------------------------------------------|------|--------|-----------|-----------|
| KEGG_AMINO_SUGAR_AND_NUCLEOTIDE_SUGAR_METABOLISM                                                                             | 37   | 2.087  | 0.000     | 0.004     |
| REACTOME_BIOSYNTHESIS_OF_THE_N_GLYCAN_PRECURSOR_DOLICHOL_LIPID_LINKED_OLIGOSACCHARIDE_ILLO_AND_TRANSFER_TO_A_NASCENT_PROTEIN | 26   | 2.031  | 0.000     | 0.007     |
| REACTOME_PURINE_METABOLISM                                                                                                   | 23   | 1.980  | 0.001     | 0.009     |
| REACTOME_METABOLISM_OF_NUCLEOTIDES                                                                                           | 53   | 1.992  | 0.000     | 0.009     |
| REACTOME_TCA_CYCLE_AND_RESPIRATORY_ELECTRON_TRANSPORT                                                                        | 120  | 1.944  | 0.000     | 0.010     |
| REACTOME_GLUCOSE_METABOLISM                                                                                                  | 52   | 1.935  | 0.000     | 0.010     |
| KEGG_PENTOSE_PHOSPHATE_PATHWAY                                                                                               | 21   | 1.951  | 0.000     | 0.010     |
| PID_INTEGRIN3_PATHWAY                                                                                                        | 16   | -2.279 | 0.000     | 0.011     |
| REACTOME_RESPIRATORY_ELECTRON_TRANSPORT_ATP_SYNTHESIS_BY_CHEMIOSMOTIC_COUPLING_AND_HEAT_PRODUCTION_BY_UNCOUPLING_PROTEINS    | 88   | 1.955  | 0.000     | 0.012     |
| KEGG_OXIDATIVE_PHOSPHORYLATION                                                                                               | 108  | 1.914  | 0.000     | 0.012     |
| REACTOME_METABOLISM_OF_AMINO_ACIDS_AND_DERIVATIVES                                                                           | 120  | 1.903  | 0.000     | 0.014     |
| REACTOME_AUTODEGRADATION_OF_CDH1_BY_CDH1_APC_C                                                                               | 54   | 1.876  | 0.000     | 0.015     |
| KEGG_ALZHEIMERS_DISEASE                                                                                                      | 132  | 1.872  | 0.000     | 0.015     |
| KEGG_PEROXISOME                                                                                                              | 57   | 1.878  | 0.000     | 0.016     |
| REACTOME_GLUCCONEOGENESIS                                                                                                    | 24   | 1.863  | 0.000     | 0.016     |
| REACTOME_FORMATION_OF_ATP_BY_CHEMIOSMOTIC_COUPLING                                                                           | 15   | 1.878  | 0.003     | 0.017     |
| KEGG_PYRIMIDINE_METABOLISM                                                                                                   | 79   | 1.857  | 0.000     | 0.017     |
| KEGG_FRUCTOSE_AND_MANNOSE_METABOLISM                                                                                         | 26   | 1.851  | 0.001     | 0.018     |
| REACTOME_SCF5KP2_MEDIATED_DEGRADATION_OF_P27_P21                                                                             | 49   | 1.846  | 0.000     | 0.018     |
| REACTOME_AUTODEGRADATION_OF_THE_E3_UBIQUITIN_LIGASE_COP1                                                                     | 46   | 1.879  | 0.001     | 0.018     |
| REACTOME_POST_TRANSLATIONAL_PROTEIN_MODIFICATION                                                                             | 114  | 1.841  | 0.000     | 0.019     |
| REACTOME_APC_C_CDH1_MEDIATED_DEGRADATION_OF_CDC20_AND_OTHER_APC_C_CDH1_TARGETED_PROTEINS_IN_LATE_MITOSIS_EARLY_G1            | 58   | 1.818  | 0.001     | 0.019     |
| KEGG_PURINE_METABOLISM                                                                                                       | 102  | 1.827  | 0.000     | 0.019     |
| REACTOME_DARPP_32_EVENTS                                                                                                     | 21   | 1.823  | 0.000     | 0.020     |
| REACTOME_P53_DEPENDENT_G1_DNA_DAMAGE_RESPONSE                                                                                | 50   | 1.819  | 0.000     | 0.020     |
| KEGG_PARKINSONS_DISEASE                                                                                                      | 105  | 1.828  | 0.000     | 0.020     |
| REACTOME_GLYCEROPHOSPHOLIPID_BIOSYNTHESIS                                                                                    | 50   | 1.805  | 0.002     | 0.020     |
| REACTOME_RESPIRATORY_ELECTRON_TRANSPORT                                                                                      | 71   | 1.807  | 0.000     | 0.020     |
| REACTOME_MITOCHONDRIAL_PROTEIN_IMPORT                                                                                        | 44   | 1.829  | 0.001     | 0.021     |
| REACTOME_CDT1_ASSOCIATION_WITH_THE_CDC6_ORC_ORIGIN_COMPLEX                                                                   | 46   | 1.808  | 0.000     | 0.021     |
| KEGG_COMPLEMENT_AND_COAGULATION_CASCADES                                                                                     | 18   | -2.149 | 0.000     | 0.022     |
| KEGG_N_GLYCAN_BIOSYNTHESIS                                                                                                   | 40   | 1.799  | 0.000     | 0.022     |
| KEGG_PROTEASOME                                                                                                              | 41   | 1.787  | 0.000     | 0.022     |
| KEGG_HUNTINGTONS_DISEASE                                                                                                     | 145  | 1.788  | 0.000     | 0.022     |
| REACTOME_P53_INDEPENDENT_G1_S_DNA_DAMAGE_CHECKPOINT                                                                          | 46   | 1.790  | 0.000     | 0.023     |
| REACTOME_REGULATION_OF_ORNITHINE_DECARBOXYLASE_ODC                                                                           | 45   | 1.792  | 0.000     | 0.023     |
| REACTOME_BRANCHED_CHAIN_AMINO_ACID_CATABOLISM                                                                                | 16   | 1.779  | 0.006     | 0.024     |
| BIOCARTA_ACTINY_PATHWAY                                                                                                      | 15   | 1.770  | 0.001     | 0.026     |
| REACTOME_CELL_CYCLE_CHECKPOINTS                                                                                              | 89   | 1.756  | 0.000     | 0.029     |
| REACTOME_ANTIGEN_PROCESSING_UBIQUITINATION_PROTEASOME_DEGRADATION                                                            | 171  | 1.758  | 0.000     | 0.030     |
| REACTOME_CROSS_PRESENTATION_OF_SOLUBLE_EXOGENOUS_ANTIGENS_ENDOSOMES                                                          | 43   | 1.756  | 0.001     | 0.030     |
| KEGG_VALINE_LEUCINE_AND_ISOLEUCINE_DEGRADATION                                                                               | 38   | 1.750  | 0.001     | 0.031     |
| REACTOME_CYCLIN_E_ASSOCIATED_EVENTS_DURING_G1_S_TRANSITION                                                                   | 57   | 1.746  | 0.001     | 0.031     |
| REACTOME_CDK_MEDIATED_PHOSPHORYLATION_AND_REMOVAL_OF_CDC6                                                                    | 44   | 1.737  | 0.002     | 0.034     |
| KEGG_GLYCOLYSIS_GLUCCONEOGENESIS                                                                                             | 40   | 1.730  | 0.001     | 0.035     |
| REACTOME_VIF_MEDIATED_DEGRADATION_OF_APOBEC3G                                                                                | 48   | 1.731  | 0.001     | 0.035     |
| REACTOME_ASPARAGINE_N_LINKED_GLYCOSYLATION                                                                                   | 65   | 1.732  | 0.002     | 0.035     |
| REACTOME_APC_C_CDC20_MEDIATED_DEGRADATION_OF_MITOTIC_PROTEINS                                                                | 60   | 1.726  | 0.000     | 0.036     |

|                                                                                       |     |        |       |       |
|---------------------------------------------------------------------------------------|-----|--------|-------|-------|
| REACTOME_G1_S_TRANSITION                                                              | 88  | 1.722  | 0.000 | 0.037 |
| REACTOME_TRNA_AMINOACYLATION                                                          | 36  | 1.720  | 0.000 | 0.037 |
| REACTOME_S_PHASE                                                                      | 86  | 1.723  | 0.000 | 0.037 |
| KEGG_PROPANOATE_METABOLISM                                                            | 26  | 1.716  | 0.002 | 0.038 |
| REACTOME_SULFUR_AMINO_ACID_METABOLISM                                                 | 17  | 1.710  | 0.007 | 0.040 |
| REACTOME_REGULATION_OF_APOPTOSIS                                                      | 51  | 1.706  | 0.003 | 0.041 |
| KEGG_GLYCOSYLPHOSPHATIDYLINOSITOL_GPI_ANCHOR_BIOSYNTHESIS                             | 19  | 1.703  | 0.003 | 0.042 |
| REACTOME_MITOTIC_G1_G1_S_PHASES                                                       | 107 | 1.698  | 0.000 | 0.044 |
| REACTOME_M_G1_TRANSITION                                                              | 67  | 1.689  | 0.000 | 0.048 |
| BIOCARTA_IL2_PATHWAY                                                                  | 19  | 1.681  | 0.014 | 0.051 |
| REACTOME_SYNTHESIS_OF_DNA                                                             | 73  | 1.671  | 0.003 | 0.054 |
| REACTOME_ORC1_REMOVAL_FROM_CHROMATIN                                                  | 54  | 1.669  | 0.002 | 0.054 |
| REACTOME_PYRIMIDINE_METABOLISM                                                        | 16  | 1.668  | 0.007 | 0.054 |
| REACTOME_SCF_BETA_TRCP_MEDIATED_DEGRADATION_OF_EMI1                                   | 48  | 1.671  | 0.001 | 0.055 |
| REACTOME_SIGNALING_BY_WNT                                                             | 62  | 1.672  | 0.001 | 0.056 |
| REACTOME_CLASS_I_MHC_MEDIATED_ANTIGEN_PROCESSING_PRESENTATION                         | 203 | 1.664  | 0.000 | 0.056 |
| REACTOME_DESTABILIZATION_OF_MRNA_BY_AUF1_HNRNP_DO                                     | 49  | 1.659  | 0.001 | 0.057 |
| REACTOME_REGULATION_OF_MITOTIC_CELL_CYCLE                                             | 67  | 1.654  | 0.002 | 0.058 |
| REACTOME_ASSEMBLY_OF_THE_PRE_REPLICATIVE_COMPLEX                                      | 55  | 1.654  | 0.003 | 0.059 |
| BIOCARTA_PGC1A_PATHWAY                                                                | 15  | 1.651  | 0.011 | 0.059 |
| KEGG_AMINOACYL_TRNA_BIOSYNTHESIS                                                      | 36  | 1.654  | 0.002 | 0.060 |
| BIOCARTA_MPR_PATHWAY                                                                  | 22  | 1.646  | 0.004 | 0.062 |
| REACTOME_POST_TRANSLATIONAL_MODIFICATION_SYNTHESIS_OF_GPI_ANCHORED_PROTEINS           | 20  | 1.642  | 0.009 | 0.063 |
| REACTOME_NEF_MEDIATES_DOWN_MODULATION_OF_CELL_SURFACE_RECEPTORS_BY_                   | 17  | 1.642  | 0.014 | 0.064 |
| RECRUITING_THEM_TO_CLATHRIN_ADAPTERS                                                  |     |        |       |       |
| REACTOME_GLYCOSPHINGOLIPID_METABOLISM                                                 | 22  | 1.626  | 0.011 | 0.072 |
| KEGG_PYRUVATE_METABOLISM                                                              | 30  | 1.624  | 0.011 | 0.073 |
| REACTOME_DOUBLE_STRAND_BREAK_REPAIR                                                   | 18  | 1.626  | 0.009 | 0.073 |
| REACTOME_CITRIC_ACID_CYCLE_TCA_CYCLE                                                  | 19  | 1.615  | 0.020 | 0.077 |
| REACTOME_DNA_REPAIR                                                                   | 90  | 1.616  | 0.002 | 0.078 |
| REACTOME_OLFACTORY_SIGNALING_PATHWAY                                                  | 16  | -1.973 | 0.000 | 0.084 |
| KEGG_TYROSINE_METABOLISM                                                              | 19  | 1.603  | 0.023 | 0.085 |
| KEGG_CYSTEINE_AND_METHIONINE_METABOLISM                                               | 24  | 1.606  | 0.005 | 0.085 |
| REACTOME_METABOLISM_OF_PROTEINS                                                       | 337 | 1.604  | 0.000 | 0.086 |
| REACTOME_OPIOID_SIGNALLING                                                            | 50  | 1.588  | 0.006 | 0.095 |
| BIOCARTA_BCR_PATHWAY                                                                  | 30  | 1.589  | 0.010 | 0.096 |
| ST_TUMOR_NECROSIS_FACTOR_PATHWAY                                                      | 27  | -1.923 | 0.011 | 0.100 |
| KEGG_GALACTOSE_METABOLISM                                                             | 19  | 1.577  | 0.024 | 0.102 |
| REACTOME_LAGGING_STRAND_SYNTHESIS                                                     | 17  | 1.577  | 0.022 | 0.103 |
| REACTOME_PHASE_II_CONJUGATION                                                         | 28  | 1.578  | 0.011 | 0.104 |
| REACTOME_RNA_POL_III_TRANSCRIPTION_INITIATION_FROM_TYPE_3_PROMOTER                    | 24  | 1.571  | 0.016 | 0.108 |
| REACTOME_THE_ROLE_OF_NEF_IN_HIV1_REPLICATION_AND_DISEASE_PATHOGENESIS                 | 24  | 1.566  | 0.024 | 0.111 |
| REACTOME_ERK_MAPK_TARGETS                                                             | 19  | 1.564  | 0.022 | 0.112 |
| REACTOME_G1_PHASE                                                                     | 31  | 1.561  | 0.017 | 0.113 |
| KEGG_STARCH_AND_SUCROSE_METABOLISM                                                    | 18  | 1.553  | 0.025 | 0.114 |
| REACTOME_MITOCHONDRIAL_TRNA_AMINOACYLATION                                            | 17  | 1.561  | 0.031 | 0.114 |
| KEGG_GLUTATHIONE_METABOLISM                                                           | 31  | 1.558  | 0.015 | 0.114 |
| REACTOME_METABOLISM_OF_CARBOHYDRATES                                                  | 148 | 1.552  | 0.001 | 0.115 |
| REACTOME_E2F_MEDIATED_REGULATION_OF_DNA_REPLICATION                                   | 20  | 1.557  | 0.023 | 0.115 |
| BIOCARTA_G1_PATHWAY                                                                   | 21  | 1.554  | 0.016 | 0.115 |
| PID_PS1_PATHWAY                                                                       | 34  | 1.555  | 0.018 | 0.115 |
| REACTOME_LYSOSOME_VESICLE_BIOGENESIS                                                  | 19  | 1.550  | 0.018 | 0.116 |
| REACTOME_ACTIVATED_NOTCH1_TRANSMITS_SIGNAL_TO_THE_NUCLEUS                             | 21  | 1.544  | 0.025 | 0.121 |
| REACTOME_RESOLUTION_OF_AP_SITES_VIA_THE_MULTIPLE_NUCLEOTIDE_PATCH_REPLACEMENT_PATHWAY | 16  | 1.536  | 0.030 | 0.129 |
| REACTOME_SYNTHESIS_AND_INTERCONVERSION_OF_NUCLEOTIDE_DI_AND_TRIPHOSPHATES             | 15  | 1.528  | 0.034 | 0.137 |
| BIOCARTA_NDKDYNAMIN_PATHWAY                                                           | 16  | 1.526  | 0.027 | 0.139 |
| KEGG_NOTCH_SIGNALING_PATHWAY                                                          | 34  | 1.521  | 0.026 | 0.140 |
| PID_FOXM1_PATHWAY                                                                     | 24  | 1.521  | 0.030 | 0.142 |
| REACTOME_PEROXISOMAL_LIPID_METABOLISM                                                 | 16  | 1.519  | 0.039 | 0.142 |
| PID_ALK1_PATHWAY                                                                      | 16  | 1.522  | 0.033 | 0.143 |
| REACTOME_INTERFERON_ALPHA_BETA_SIGNALING                                              | 46  | 1.510  | 0.018 | 0.153 |
| KEGG_CITRATE_CYCLE_TCA_CYCLE                                                          | 27  | 1.507  | 0.037 | 0.156 |
| REACTOME_BASE_EXCISION_REPAIR                                                         | 18  | 1.505  | 0.029 | 0.157 |
| REACTOME_ACTIVATION_OF_KAINATE_RECEPTORS_UPON_Glutamate_BINDING                       | 18  | 1.498  | 0.043 | 0.165 |
| NABA_MATRISOME                                                                        | 285 | -1.761 | 0.000 | 0.166 |
| ST_ADRENERGIC                                                                         | 20  | -1.774 | 0.010 | 0.174 |
| REACTOME_DOWNREGULATION_OF_SMAD2_3_SMAD4_TRANSCRIPTIONAL_ACTIVITY                     | 17  | -1.611 | 0.014 | 0.174 |
| PID_INTEGRIN1_PATHWAY                                                                 | 27  | -1.616 | 0.016 | 0.176 |
| BIOCARTA_CCR3_PATHWAY                                                                 | 15  | 1.488  | 0.040 | 0.178 |
| NABA_BASEMENT_MEMBRANES                                                               | 15  | -1.641 | 0.017 | 0.179 |
| REACTOME_APOPTOTIC_EXECUTION_PHASE                                                    | 35  | -1.698 | 0.000 | 0.180 |
| KEGG_PORPHYRIN_AND_CHLOROPHYLL_METABOLISM                                             | 20  | 1.483  | 0.049 | 0.184 |

|                                                                    |     |        |       |       |
|--------------------------------------------------------------------|-----|--------|-------|-------|
| NABA_CORE_MATRISOME                                                | 71  | -1.626 | 0.000 | 0.185 |
| BIOCARTA_TNFR2_PATHWAY                                             | 16  | -1.616 | 0.041 | 0.186 |
| PID_CD40_PATHWAY                                                   | 23  | -1.705 | 0.016 | 0.189 |
| REACTOME_DNA_STRAND_ELONGATION                                     | 25  | 1.478  | 0.048 | 0.190 |
| BIOCARTA_P53HYPOXIA_PATHWAY                                        | 19  | -1.641 | 0.014 | 0.191 |
| KEGG_RNA_DEGRADATION                                               | 52  | 1.476  | 0.032 | 0.191 |
| PID_FRA_PATHWAY                                                    | 20  | -1.651 | 0.019 | 0.191 |
| NABA_SECRETED_FACTORS                                              | 88  | -1.718 | 0.000 | 0.193 |
| KEGG_RNA_POLYMERASE                                                | 27  | 1.474  | 0.047 | 0.193 |
| NABA_ECM_AFFILIATED                                                | 56  | -1.780 | 0.000 | 0.196 |
| REACTOME_PYRUVATE_METABOLISM_AND_CITRIC_ACID_TCA_CYCLE             | 36  | 1.470  | 0.043 | 0.197 |
| KEGG_CYTOKINE_CYTOKINE_RECEPTOR_INTERACTION                        | 101 | -1.586 | 0.000 | 0.197 |
| PID_TCPTP_PATHWAY                                                  | 30  | -1.573 | 0.031 | 0.205 |
| NABA_ECM_GLYCOPROTEINS                                             | 50  | -1.664 | 0.009 | 0.205 |
| REACTOME_CLASS_B_2_SECRETIN_FAMILY_RECEPTORS                       | 30  | -1.652 | 0.000 | 0.206 |
| KEGG_ECM_RECEPTOR_INTERACTION                                      | 31  | -1.794 | 0.006 | 0.210 |
| BIOCARTA_TID_PATHWAY                                               | 15  | 1.458  | 0.066 | 0.216 |
| REACTOME_RNA_POL_III_TRANSCRIPTION_TERMINATION                     | 16  | 1.453  | 0.060 | 0.220 |
| BIOCARTA_IL1R_PATHWAY                                              | 26  | -1.551 | 0.018 | 0.222 |
| REACTOME_RNA_POL_III_CHAIN_ELONGATION                              | 15  | 1.454  | 0.054 | 0.222 |
| BIOCARTA_AT1R_PATHWAY                                              | 26  | 1.453  | 0.041 | 0.222 |
| REACTOME_GLOBAL_GENOMIC_NER_GG_NER                                 | 27  | 1.448  | 0.050 | 0.223 |
| PID_TCR_CALCIIUM_PATHWAY                                           | 20  | 1.449  | 0.049 | 0.224 |
| REACTOME_EXTENSION_OF_TELOMERES                                    | 21  | 1.448  | 0.050 | 0.225 |
| REACTOME_IL_2_SIGNALING                                            | 30  | 1.444  | 0.040 | 0.228 |
| REACTOME_SPHINGOLIPID_METABOLISM                                   | 38  | 1.438  | 0.046 | 0.234 |
| REACTOME_PROCESSING_OF_CAPPED_INTRONLESS_PRE_MRNA                  | 19  | 1.439  | 0.058 | 0.235 |
| REACTOME_ACTIVATION_OF_NF_KAPPAB_IN_B_CELLS                        | 58  | 1.438  | 0.033 | 0.236 |
| NABA_MATRISOME_ASSOCIATED                                          | 214 | -1.531 | 0.000 | 0.241 |
| REACTOME_ER_PHAGOSOME_PATHWAY                                      | 57  | 1.429  | 0.040 | 0.248 |
| REACTOME_NUCLEAR_EVENTS_KINASE_AND_TRANSCRIPTION_FACTOR_ACTIVATION | 22  | 1.428  | 0.054 | 0.248 |

## HCC vs LC

| NAME                                                                                                                      | SIZE | NES    | NOM p-val | FDR q-val |
|---------------------------------------------------------------------------------------------------------------------------|------|--------|-----------|-----------|
| REACTOME_GENERIC_TRANSCRIPTION_PATHWAY                                                                                    | 217  | 3.281  | 0.000     | 0.000     |
| REACTOME_PEPTIDE_CHAIN_ELONGATION                                                                                         | 81   | -5.219 | 0.000     | 0.000     |
| REACTOME_SRP_DEPENDENT_COTRANSLATIONAL_PROTEIN_TARGETING_TO_MEMBRANE                                                      | 104  | -5.151 | 0.000     | 0.000     |
| KEGG_RIBOSOME                                                                                                             | 83   | -5.061 | 0.000     | 0.000     |
| REACTOME_INFLUENZA_VIRAL_RNA_TRANSCRIPTION_AND_REPLICATION                                                                | 96   | -5.015 | 0.000     | 0.000     |
| REACTOME_3_UTR_MEDIATED_TRANSLATIONAL_REGULATION                                                                          | 101  | -4.649 | 0.000     | 0.000     |
| REACTOME_TRANSLATION                                                                                                      | 141  | -4.632 | 0.000     | 0.000     |
| REACTOME_NONSENSE_MEDIATED_DECAY_ENHANCED_BY_THE_EXON_JUNCTION_COMPLEX                                                    | 100  | -4.471 | 0.000     | 0.000     |
| REACTOME_METABOLISM_OF_PROTEINS                                                                                           | 337  | -4.187 | 0.000     | 0.000     |
| REACTOME_INFLUENZA_LIFE_CYCLE                                                                                             | 129  | -3.967 | 0.000     | 0.000     |
| REACTOME_RESPIRATORY_ELECTRON_TRANSPORT_ATP_SYNTHESIS_BY_CHEMIOSMOTIC_COUPLING_AND_HEAT_PRODUCTION_BY_UNCOUPLING_PROTEINS | 88   | -3.873 | 0.000     | 0.000     |
| KEGG_OXIDATIVE_PHOSPHORYLATION                                                                                            | 108  | -3.777 | 0.000     | 0.000     |
| REACTOME_METABOLISM_OF_MRNA                                                                                               | 199  | -3.744 | 0.000     | 0.000     |
| KEGG_PARKINSONS_DISEASE                                                                                                   | 105  | -3.660 | 0.000     | 0.000     |
| KEGG_HUNTINGTONS_DISEASE                                                                                                  | 145  | -3.465 | 0.000     | 0.000     |
| REACTOME_RESPIRATORY_ELECTRON_TRANSPORT                                                                                   | 71   | -3.264 | 0.000     | 0.000     |
| KEGG_ALZHEIMERS_DISEASE                                                                                                   | 132  | -3.253 | 0.000     | 0.000     |
| REACTOME_TCA_CYCLE_AND_RESPIRATORY_ELECTRON_TRANSPORT                                                                     | 120  | -3.100 | 0.000     | 0.000     |
| REACTOME_METABOLISM_OF_RNA                                                                                                | 241  | -3.112 | 0.000     | 0.000     |
| KEGG_FRUCTOSE_AND_MANNANOSE_METABOLISM                                                                                    | 26   | -2.783 | 0.000     | 0.000     |
| REACTOME_FORMATION_OF_THE_TERNARY_COMPLEX_AND_SUBSEQUENTLY_THE_43S_COMPLEX                                                | 47   | -2.757 | 0.000     | 0.000     |
| REACTOME_FORMATION_OF_ATP_BY_CHEMIOSMOTIC_COUPLING                                                                        | 15   | -2.610 | 0.000     | 0.002     |
| REACTOME_ACTIVATION_OF_THE_MRNA_UPON_BINDING_OF_THE_CAP_BINDING_COMPLEX_AND_EIFS_AND_SUBSEQUENT_BINDING_TO_43S            | 55   | -2.557 | 0.000     | 0.002     |
| REACTOME_GENERATION_OF_SECOND_MESSENGER_MOLECULES                                                                         | 26   | -2.482 | 0.000     | 0.004     |
| KEGG_PURINE_METABOLISM                                                                                                    | 102  | -2.458 | 0.000     | 0.004     |
| REACTOME_INTEGRATION_OF_ENERGY_METABOLISM                                                                                 | 66   | -2.384 | 0.004     | 0.008     |
| KEGG_REGULATION_OF_ACTIN_CYTOSKELETON                                                                                     | 116  | -2.355 | 0.000     | 0.009     |
| REACTOME_GLUCOSE_METABOLISM                                                                                               | 52   | -2.339 | 0.000     | 0.010     |
| REACTOME_MITOCHONDRIAL_PROTEIN_IMPORT                                                                                     | 44   | -2.266 | 0.000     | 0.018     |
| PID_TCR_PATHWAY                                                                                                           | 60   | -2.243 | 0.000     | 0.020     |
| REACTOME_GLYCOLYSIS                                                                                                       | 23   | -2.232 | 0.002     | 0.021     |
| REACTOME_PURINE_METABOLISM                                                                                                | 23   | -2.199 | 0.002     | 0.026     |
| KEGG_PENTOSE_PHOSPHATE_PATHWAY                                                                                            | 21   | -2.174 | 0.000     | 0.029     |

|                                                                                                         |     |        |       |       |
|---------------------------------------------------------------------------------------------------------|-----|--------|-------|-------|
| BIOCARTA_PGC1A_PATHWAY                                                                                  | 15  | -2.160 | 0.000 | 0.031 |
| BIOCARTA_NDKDYNAMIN_PATHWAY                                                                             | 16  | -2.136 | 0.002 | 0.034 |
| REACTOME_METABOLISM_OF_NUCLEOTIDES                                                                      | 53  | -2.117 | 0.004 | 0.037 |
| KEGG_AMINO_SUGAR_AND_NUCLEOTIDE_SUGAR_METABOLISM                                                        | 37  | -2.104 | 0.000 | 0.037 |
| BIOCARTA_RHO_PATHWAY                                                                                    | 23  | -2.107 | 0.006 | 0.038 |
| KEGG_NEUROTROPHIN_SIGNALING_PATHWAY                                                                     | 101 | -2.084 | 0.006 | 0.041 |
| REACTOME_MHC_CLASS_II_ANTIGEN_PRESENTATION                                                              | 67  | -2.028 | 0.000 | 0.053 |
| REACTOME_RECYCLING_PATHWAY_OF_L1                                                                        | 19  | -2.035 | 0.004 | 0.054 |
| KEGG_CARDIAC_MUSCLE_CONTRACTION                                                                         | 38  | -2.028 | 0.004 | 0.055 |
| REACTOME_ADAPTIVE_IMMUNE_SYSTEM                                                                         | 417 | -2.009 | 0.000 | 0.057 |
| REACTOME_GLUCONEOGENESIS                                                                                | 24  | -2.011 | 0.004 | 0.058 |
| REACTOME_PD1_SIGNALING                                                                                  | 16  | -1.982 | 0.006 | 0.066 |
| PID_FANCONI_PATHWAY                                                                                     | 35  | 2.403  | 0.000 | 0.066 |
| REACTOME_PHOSPHORYLATION_OF_CD3_AND_TCR_ZETA_CHAINS                                                     | 16  | -1.962 | 0.010 | 0.072 |
| PID_ECADHERIN_NASCENT_AJ_PATHWAY                                                                        | 31  | -1.944 | 0.012 | 0.078 |
| KEGG_LONG_TERM_POTENTIATION                                                                             | 47  | -1.923 | 0.008 | 0.085 |
| BIOCARTA_CSK_PATHWAY                                                                                    | 19  | -1.910 | 0.015 | 0.090 |
| PID_LYSOPHOSPHOLIPID_PATHWAY                                                                            | 38  | -1.900 | 0.009 | 0.093 |
| BIOCARTA_CHREBP2_PATHWAY                                                                                | 35  | -1.880 | 0.015 | 0.098 |
| REACTOME_AUTODEGRADATION_OF_THE_E3_UBIQUITIN_LIGASE_COP1                                                | 46  | -1.886 | 0.006 | 0.098 |
| REACTOME_REGULATION_OF_INSULIN_SECRETION                                                                | 46  | -1.875 | 0.014 | 0.099 |
| REACTOME_SIGNALLING_TO_ERKS                                                                             | 27  | -1.870 | 0.006 | 0.099 |
| PID_ERBB1_DOWNSTREAM_PATHWAY                                                                            | 84  | -1.880 | 0.008 | 0.100 |
| REACTOME_ACTIVATION_OF_KAINATE_RECEPTORS_UPON_Glutamate_BINDING                                         | 18  | -1.862 | 0.018 | 0.102 |
| BIOCARTA_GPCR_PATHWAY                                                                                   | 27  | -1.859 | 0.012 | 0.102 |
| REACTOME_ER_PHAGOSOME_PATHWAY                                                                           | 57  | -1.854 | 0.006 | 0.103 |
| REACTOME_REGULATION_OF_MITOTIC_CELL_CYCLE                                                               | 67  | -1.844 | 0.010 | 0.103 |
| REACTOME_AMYLOIDS                                                                                       | 62  | -1.831 | 0.010 | 0.104 |
| KEGG_PYRIMIDINE_METABOLISM                                                                              | 79  | -1.849 | 0.015 | 0.104 |
| KEGG_PROTEIN_EXPORT                                                                                     | 22  | -1.845 | 0.008 | 0.104 |
| REACTOME_NEF_MEDIATES_DOWN_MODULATION_OF_CELL_SURFACE_RECEPTORS_BY_RECRUITING_THEM_TO_CLATHRIN_ADAPTERS | 17  | -1.832 | 0.025 | 0.105 |
| BIOCARTA_INTEGRIN_PATHWAY                                                                               | 29  | -1.837 | 0.012 | 0.105 |
| REACTOME_VIF_MEDIATED_DEGRADATION_OF_APOBEC3G                                                           | 48  | -1.833 | 0.016 | 0.106 |
| NABA_ECM_REGULATORS                                                                                     | 70  | -1.817 | 0.018 | 0.110 |
| PID_TRKR_PATHWAY                                                                                        | 44  | -1.819 | 0.022 | 0.110 |
| REACTOME_THE_ROLE_OF_NEF_IN_HIV1_REPLICATION_AND_DISEASE_PATHOGENESIS                                   | 24  | -1.798 | 0.008 | 0.120 |
| BIOCARTA_CHEMICAL_PATHWAY                                                                               | 19  | -1.789 | 0.014 | 0.121 |
| PID_IL8_CXCR2_PATHWAY                                                                                   | 26  | -1.793 | 0.010 | 0.122 |
| KEGG_GALACTOSE_METABOLISM                                                                               | 19  | -1.790 | 0.017 | 0.122 |
| REACTOME_TCR_SIGNALING                                                                                  | 46  | -1.776 | 0.027 | 0.128 |
| REACTOME_P53_INDEPENDENT_G1_S_DNA_DAMAGE_CHECKPOINT                                                     | 46  | -1.768 | 0.024 | 0.131 |
| BIOCARTA_MPR_PATHWAY                                                                                    | 22  | -1.750 | 0.043 | 0.140 |
| REACTOME_METABOLISM_OF_CARBOHYDRATES                                                                    | 148 | -1.751 | 0.027 | 0.141 |
| PID_ERBB2_ERBB3_PATHWAY                                                                                 | 33  | -1.746 | 0.019 | 0.141 |
| REACTOME_AUTODEGRADATION_OF_CDH1_BY_CDH1_APC_C                                                          | 54  | -1.742 | 0.026 | 0.142 |
| REACTOME_ANTIGEN_PROCESSING_CROSS_PRESENTATION                                                          | 66  | -1.734 | 0.022 | 0.146 |
| REACTOME_IL_RECEPTOR_SHC_SIGNALING                                                                      | 17  | -1.729 | 0.029 | 0.148 |
| KEGG_SYSTEMIC_LUPUS_ERYTHEMATOSUS                                                                       | 99  | -1.726 | 0.021 | 0.148 |
| BIOCARTA_CALCINEURIN_PATHWAY                                                                            | 15  | -1.715 | 0.038 | 0.155 |
| REACTOME_IL_2_SIGNALING                                                                                 | 30  | -1.711 | 0.023 | 0.155 |
| BIOCARTA_CCR3_PATHWAY                                                                                   | 15  | -1.699 | 0.027 | 0.159 |
| REACTOME_CDK_MEDIATED_PHOSPHORYLATION_AND_REMOVAL_OF_CDC6                                               | 44  | -1.704 | 0.027 | 0.160 |
| REACTOME_SIGNALING_BY_WNT                                                                               | 62  | -1.700 | 0.023 | 0.161 |
| PID_ENDOTHELIN_PATHWAY                                                                                  | 37  | -1.690 | 0.026 | 0.161 |
| REACTOME_SIGNALLING_TO_RAS                                                                              | 20  | -1.677 | 0.035 | 0.162 |
| REACTOME_CDT1_ASSOCIATION_WITH_THE_CDC6_ORC_ORIGIN_COMPLEX                                              | 46  | -1.686 | 0.045 | 0.162 |
| REACTOME_PROLONGED_ERK_ACTIVATION_EVENTS                                                                | 15  | -1.690 | 0.028 | 0.162 |
| REACTOME_MUSCLE_CONTRACTION                                                                             | 20  | -1.681 | 0.025 | 0.163 |
| KEGG_ASTHMA                                                                                             | 16  | -1.692 | 0.034 | 0.163 |
| BIOCARTA_MEF2D_PATHWAY                                                                                  | 16  | -1.677 | 0.028 | 0.163 |
| KEGG_CALCIIUM_SIGNALING_PATHWAY                                                                         | 78  | -1.682 | 0.038 | 0.164 |
| SIG_BCR_SIGNALING_PATHWAY                                                                               | 42  | -1.670 | 0.027 | 0.164 |
| REACTOME_HEMOSTASIS                                                                                     | 265 | -1.670 | 0.030 | 0.166 |
| PID_ALPHA_SYNUCLEIN_PATHWAY                                                                             | 25  | -1.663 | 0.035 | 0.167 |
| REACTOME_NGF_SIGNALLING_VIA_TRKA_FROM_THE_PLASMA_MEMBRANE                                               | 103 | -1.657 | 0.036 | 0.171 |
| KEGG_PATHOGENIC_ESCHERICHIA_COLI_INFECTION                                                              | 43  | -1.645 | 0.029 | 0.179 |
| REACTOME_TRAF6_MEDIATED_IRF7_ACTIVATION                                                                 | 15  | 2.153  | 0.000 | 0.184 |
| KEGG_LYSOSOME                                                                                           | 94  | -1.636 | 0.040 | 0.185 |
| REACTOME_TRANSPORT_OF_MATURE_TRANSCRIPT_TO_CYTOPLASM                                                    | 43  | 2.020  | 0.006 | 0.191 |
| BIOCARTA_NFAT_PATHWAY                                                                                   | 35  | -1.615 | 0.047 | 0.192 |
| BIOCARTA_TCR_PATHWAY                                                                                    | 41  | -1.620 | 0.035 | 0.193 |

|                                                                                             |     |        |       |       |
|---------------------------------------------------------------------------------------------|-----|--------|-------|-------|
| BIOCARTA_BCR_PATHWAY                                                                        | 30  | -1.611 | 0.032 | 0.194 |
| REACTOME_ASSEMBLY_OF_THE_PRE_REPLICATIVE_COMPLEX                                            | 55  | -1.617 | 0.042 | 0.194 |
| REACTOME_APC_C_CDC20_MEDIATED_DEGRADATION_OF_MITOTIC_PROTEINS                               | 60  | -1.615 | 0.046 | 0.194 |
| KEGG_LEUKOCYTE_TRANSENDOTHELIAL_MIGRATION                                                   | 66  | -1.620 | 0.041 | 0.195 |
| REACTOME_REGULATION_OF_ORNITHINE_DECARBOXYLASE_ODC                                          | 45  | -1.602 | 0.062 | 0.197 |
| KEGG_ARACHIDONIC_ACID_METABOLISM                                                            | 20  | -1.620 | 0.029 | 0.197 |
| REACTOME_SCFSPK2_MEDIATED_DEGRADATION_OF_P27_P21                                            | 49  | -1.603 | 0.054 | 0.198 |
| REACTOME_LYSOSOME_VESICLE_BIOGENESIS                                                        | 19  | -1.605 | 0.045 | 0.198 |
| KEGG_CYTOKINE_CYTOKINE_RECEPTOR_INTERACTION                                                 | 101 | 2.031  | 0.004 | 0.199 |
| BIOCARTA_ACTININ_PATHWAY                                                                    | 15  | -1.596 | 0.032 | 0.201 |
| PID_CD8_TCR_PATHWAY                                                                         | 47  | -1.587 | 0.034 | 0.205 |
| PID_PDGFBRB_PATHWAY                                                                         | 103 | -1.588 | 0.058 | 0.206 |
| KEGG_MAPK_SIGNALING_PATHWAY                                                                 | 167 | 1.913  | 0.012 | 0.215 |
| BIOCARTA_PROTEASOME_PATHWAY                                                                 | 28  | -1.566 | 0.061 | 0.216 |
| REACTOME_MRNA_SPLICING_MINOR_PATHWAY                                                        | 35  | -1.572 | 0.067 | 0.216 |
| KEGG_COMPLEMENT_AND_COAGULATION_CASCADES                                                    | 18  | 2.041  | 0.004 | 0.217 |
| REACTOME_METABOLISM_OF_AMINO_ACIDS_AND_DERIVATIVES                                          | 120 | -1.562 | 0.052 | 0.217 |
| REACTOME_SCF_BETA_TRCP_MEDIATED_DEGRADATION_OF_EMI1                                         | 48  | -1.556 | 0.048 | 0.217 |
| REACTOME_PLATELET_ACTIVATION_SIGNALING_AND_AGGREGATION                                      | 120 | -1.569 | 0.063 | 0.217 |
| BIOCARTA_HDAC_PATHWAY                                                                       | 22  | -1.567 | 0.048 | 0.217 |
| REACTOME_SEMA4D_INDUCED_CELL_MIGRATION_AND_GROWTH_CONE_COLLAPSE                             | 16  | -1.563 | 0.050 | 0.217 |
| PID_CXCR4_PATHWAY                                                                           | 83  | -1.559 | 0.030 | 0.217 |
| PID_TCR_CALCIIUM_PATHWAY                                                                    | 20  | -1.572 | 0.036 | 0.217 |
| BIOCARTA_IL2RB_PATHWAY                                                                      | 36  | -1.556 | 0.050 | 0.218 |
| REACTOME_MEIOTIC_SYNOPSIS                                                                   | 60  | 2.098  | 0.002 | 0.218 |
| KEGG_INTESTINAL_IMMUNE_NETWORK_FOR_IGA_PRODUCTION                                           | 27  | -1.548 | 0.063 | 0.220 |
| REACTOME_SEMA4D_IN_SEMAPHORIN_SIGNALING                                                     | 19  | -1.548 | 0.056 | 0.221 |
| KEGG_B_CELL_RECEPTOR_SIGNALING_PATHWAY                                                      | 63  | -1.550 | 0.057 | 0.221 |
| REACTOME_REGULATION_OF_APOPTOSIS                                                            | 51  | -1.535 | 0.059 | 0.225 |
| PID_PI3KCI_PATHWAY                                                                          | 38  | -1.536 | 0.068 | 0.226 |
| REACTOME_APC_C_CDH1_MEDIATED_DEGRADATION_OF_CDC20_AND_OTHER_APC_C_CDH1_TARGETED_PROTEINS_II | 58  | -1.539 | 0.066 | 0.226 |
| PID_AR_NONGENOMIC_PATHWAY                                                                   | 25  | -1.532 | 0.056 | 0.226 |
| PID_TOLL_ENDOGENOUS_PATHWAY                                                                 | 21  | 1.915  | 0.004 | 0.227 |
| PID_THROMBIN_PAR1_PATHWAY                                                                   | 33  | -1.537 | 0.055 | 0.227 |
| BIOCARTA_NKT_PATHWAY                                                                        | 15  | 1.879  | 0.010 | 0.229 |
| REACTOME_PPARA_ACTIVATES_GENE_EXPRESSION                                                    | 72  | 1.888  | 0.008 | 0.232 |
| REACTOME_RNA_POL_I_PROMOTER_OPENING                                                         | 54  | -1.521 | 0.058 | 0.236 |
| ST_TUMOR_NECROSIS_FACTOR_PATHWAY                                                            | 27  | 2.049  | 0.006 | 0.239 |
| PID_INTEGRIN3_PATHWAY                                                                       | 16  | 2.157  | 0.002 | 0.240 |
| REACTOME_MITOTIC_PROMETAPHASE                                                               | 63  | 1.932  | 0.011 | 0.240 |
| PID_INTEGRIN1_PATHWAY                                                                       | 27  | 1.917  | 0.008 | 0.242 |
| REACTOME_RNA_POL_I_TRANSCRIPTION                                                            | 75  | -1.513 | 0.061 | 0.244 |
| PID_FOXM1_PATHWAY                                                                           | 24  | -1.509 | 0.067 | 0.246 |
