# Supplementary material
Source: PubMed Central journal article supplement (PMC11027621)
Supplement: 262_2020_2561_MOESM8_ESM.pdf [file 262_2020_2561_MOESM8_ESM.pdf]

Supplementary Table 1B

## C5-Gene Ontology

## Liver Cirrhosis (LC) vs Healthy Donor (HD)

| NAME                                                                                   | SIZE | NES   | NOM p-val | FDR q-val |
|----------------------------------------------------------------------------------------|------|-------|-----------|-----------|
| GO_MITOCHONDRIAL_MEMBRANE_PART                                                         | 137  | 2.077 | 0.000     | 0.001     |
| GO_RESPIRATORY_CHAIN                                                                   | 67   | 2.077 | 0.000     | 0.001     |
| GO_OXIDOREDUCTASE_COMPLEX                                                              | 79   | 2.084 | 0.000     | 0.001     |
| GO_OXIDOREDUCTASE_ACTIVITY_ACTING_ON_NAD_P_H_QUINONE_OR_SIMILAR_COMPOUND_AS_ACCEPTOR   | 46   | 2.081 | 0.000     | 0.001     |
| GO_QUINONE_METABOLIC_PROCESS                                                           | 19   | 2.105 | 0.000     | 0.001     |
| GO_MITOCHONDRIAL_TRANSLATION                                                           | 100  | 2.085 | 0.000     | 0.001     |
| GO_LYASE_ACTIVITY                                                                      | 115  | 2.093 | 0.000     | 0.001     |
| GO_MITOCHONDRIAL_RESPIRATORY_CHAIN_COMPLEX_ASSEMBLY                                    | 62   | 2.090 | 0.000     | 0.001     |
| GO_NUCLEOBASE_BIOSYNTHETIC_PROCESS                                                     | 15   | 2.106 | 0.000     | 0.001     |
| GO_CELLULAR_RESPIRATION                                                                | 123  | 2.060 | 0.000     | 0.001     |
| GO_MITOCHONDRIAL_RESPIRATORY_CHAIN_COMPLEX_I_BIOGENESIS                                | 48   | 2.097 | 0.000     | 0.001     |
| GO_NUCLEOSIDE_PHOSPHATE_BIOSYNTHETIC_PROCESS                                           | 121  | 2.061 | 0.000     | 0.001     |
| GO_OXIDATIVE_PHOSPHORYLATION                                                           | 71   | 2.061 | 0.000     | 0.001     |
| GO_CARBON_OXYGEN_LYASE_ACTIVITY                                                        | 48   | 2.056 | 0.000     | 0.001     |
| GO_PURINE_CONTAINING_COMPOUND_BIOSYNTHETIC_PROCESS                                     | 89   | 2.062 | 0.000     | 0.001     |
| GO_OXIDOREDUCTASE_ACTIVITY_ACTING_ON_CH_OH_GROUP_OF_DONORS                             | 72   | 2.114 | 0.000     | 0.001     |
| GO_CELLULAR_PROTEIN_COMPLEX_DISASSEMBLY                                                | 106  | 2.069 | 0.000     | 0.001     |
| GO_NUCLEOSIDE_TRIPHOSPHATE_BIOSYNTHETIC_PROCESS                                        | 47   | 2.063 | 0.000     | 0.001     |
| GO_NADH_DEHYDROGENASE_COMPLEX                                                          | 42   | 2.046 | 0.000     | 0.001     |
| GO_NUCLEOSIDE_MONOPHOSPHATE_METABOLIC_PROCESS                                          | 181  | 2.044 | 0.000     | 0.001     |
| GO_NUCLEOSIDE_MONOPHOSPHATE_BIOSYNTHETIC_PROCESS                                       | 63   | 2.193 | 0.000     | 0.001     |
| GO_CELLULAR_ALDEHYDE_METABOLIC_PROCESS                                                 | 57   | 2.131 | 0.000     | 0.001     |
| GO_INNER_MITOCHONDRIAL_MEMBRANE_PROTEIN_COMPLEX                                        | 90   | 2.134 | 0.000     | 0.001     |
| GO_MITOCHONDRIAL_PROTEIN_COMPLEX                                                       | 115  | 2.146 | 0.000     | 0.001     |
| GO_TRANSLATIONAL_TERMINATION                                                           | 90   | 2.144 | 0.000     | 0.001     |
| GO_PURINE_NUCLEOSIDE_MONOPHOSPHATE_BIOSYNTHETIC_PROCESS                                | 47   | 2.048 | 0.000     | 0.001     |
| GO_RIBONUCLEOSIDE_TRIPHOSPHATE_BIOSYNTHETIC_PROCESS                                    | 39   | 2.047 | 0.000     | 0.001     |
| GO_GLYCOSYL_COMPOUND_METABOLIC_PROCESS                                                 | 261  | 2.032 | 0.000     | 0.001     |
| GO_POSITIVE_REGULATION_OF_PHOSPHATASE_ACTIVITY                                         | 18   | 2.153 | 0.000     | 0.001     |
| GO_ELECTRON_TRANSPORT_CHAIN                                                            | 79   | 2.025 | 0.000     | 0.001     |
| GO_ORGANELLAR_RIBOSOME                                                                 | 69   | 2.017 | 0.000     | 0.001     |
| GO_POSITIVE_REGULATION_OF_DEPHOSPHORYLATION                                            | 32   | 2.015 | 0.000     | 0.002     |
| GO_TRANSLATIONAL_ELONGATION                                                            | 104  | 2.010 | 0.000     | 0.002     |
| GO_OXIDOREDUCTASE_ACTIVITY_ACTING_ON_NAD_P_H                                           | 70   | 2.007 | 0.000     | 0.002     |
| GO_NUCLEOBASE_CONTAINING_SMALL_MOLECULE_METABOLIC_PROCESS                              | 361  | 2.006 | 0.000     | 0.002     |
| GO_NUCLEOSIDE_TRIPHOSPHATE_METABOLIC_PROCESS                                           | 169  | 2.011 | 0.000     | 0.002     |
| GO_OXIDOREDUCTASE_ACTIVITY_ACTING_ON_THE_CH_OH_GROUP_OF_DONORS_NAD_OR_NADP_AS_ACCEPTOR | 63   | 2.196 | 0.000     | 0.002     |
| GO_ORGANELLE_INNER_MEMBRANE                                                            | 398  | 2.002 | 0.000     | 0.002     |
| GO_HYDRO_LYASE_ACTIVITY                                                                | 34   | 1.996 | 0.000     | 0.002     |
| GO_MITOCHONDRIAL_MATRIX                                                                | 331  | 1.985 | 0.000     | 0.002     |
| GO_ORGANELLAR_SMALL_RIBOSOMAL_SUBUNIT                                                  | 25   | 1.978 | 0.000     | 0.002     |
| GO_NUCLEOBASE_METABOLIC_PROCESS                                                        | 29   | 1.984 | 0.000     | 0.002     |
| GO_GLYCOSYL_COMPOUND_BIOSYNTHETIC_PROCESS                                              | 91   | 1.982 | 0.000     | 0.002     |
| GO_PYRIMIDINE_CONTAINING_COMPOUND_BIOSYNTHETIC_PROCESS                                 | 32   | 1.979 | 0.000     | 0.002     |
| GO_COFACTOR_METABOLIC_PROCESS                                                          | 233  | 1.966 | 0.000     | 0.003     |
| GO_SMALL_MOLECULE_CATABOLIC_PROCESS                                                    | 197  | 1.964 | 0.000     | 0.003     |
| GO_ELECTRON_CARRIER_ACTIVITY                                                           | 80   | 1.953 | 0.000     | 0.004     |
| GO_NAD_BINDING                                                                         | 40   | 1.957 | 0.000     | 0.004     |
| GO_PURINE_NUCLEOSIDE_BIOSYNTHETIC_PROCESS                                              | 67   | 1.954 | 0.000     | 0.004     |
| GO_PIGMENT_BIOSYNTHETIC_PROCESS                                                        | 33   | 1.954 | 0.001     | 0.004     |
| GO_OXIDOREDUCTASE_ACTIVITY_ACTING_ON_PEROXIDE_AS_ACCEPTOR                              | 23   | 1.946 | 0.000     | 0.004     |
| GO_OXIDOREDUCTASE_ACTIVITY_ACTING_ON_THE_CH_CH_GROUP_OF_DONORS                         | 41   | 1.936 | 0.000     | 0.005     |
| GO_MONOSACCHARIDE_BIOSYNTHETIC_PROCESS                                                 | 40   | 1.937 | 0.000     | 0.005     |
| GO_MACROMOLECULAR_COMPLEX_DISASSEMBLY                                                  | 152  | 1.934 | 0.000     | 0.005     |
| GO_PURINE_CONTAINING_COMPOUND_METABOLIC_PROCESS                                        | 257  | 1.934 | 0.000     | 0.005     |
| GO_PYRIMIDINE_NUCLEOSIDE_TRIPHOSPHATE_BIOSYNTHETIC_PROCESS                             | 17   | 1.922 | 0.000     | 0.005     |
| GO_ORGANIC_ACID_CATABOLIC_PROCESS                                                      | 120  | 1.919 | 0.000     | 0.006     |
| GO_REGULATION_OF_ACTIN_NUCLEATION                                                      | 19   | 1.919 | 0.000     | 0.006     |
| GO_FATTY_ACID_BETA_OXIDATION                                                           | 37   | 1.915 | 0.000     | 0.006     |
| GO_CELLULAR_METABOLIC_COMPOUND_SALVAGE                                                 | 27   | 1.915 | 0.000     | 0.006     |
| GO_PYRIMIDINE_NUCLEOTIDE_BIOSYNTHETIC_PROCESS                                          | 26   | 1.909 | 0.000     | 0.006     |
| GO_KETONE_BIOSYNTHETIC_PROCESS                                                         | 18   | 1.903 | 0.000     | 0.007     |
| GO_PYRIMIDINE_NUCLEOTIDE_METABOLIC_PROCESS                                             | 40   | 1.903 | 0.000     | 0.007     |
| GO_ENERGY_DERIVATION_BY_OXIDATION_OF_ORGANIC_COMPOUNDS                                 | 168  | 1.900 | 0.000     | 0.007     |
| GO_PYRIMIDINE_CONTAINING_COMPOUND_METABOLIC_PROCESS                                    | 59   | 1.904 | 0.000     | 0.007     |
| GO_TRANSFERASE_ACTIVITY_TRANSFERRING_ALKYL_OR_ARYL_OTHER_THAN_METHYL_GROUPS            | 44   | 1.896 | 0.000     | 0.007     |
| GO_OXIDOREDUCTASE_ACTIVITY                                                             | 400  | 1.892 | 0.000     | 0.007     |
| GO_MITOCHONDRIAL_ATP_SYNTHESIS_COUPLED_PROTON_TRANSPORT                                | 17   | 1.889 | 0.001     | 0.007     |
| GO_RESPONSE_TO_INTERFERON_BETA                                                         | 18   | 1.883 | 0.001     | 0.008     |
| GO_COENZYME_METABOLIC_PROCESS                                                          | 181  | 1.879 | 0.000     | 0.008     |
| GO_GENERATION_OF_PRECURSOR_METABOLITES_AND_ENERGY                                      | 216  | 1.880 | 0.000     | 0.008     |
| GO_PIGMENT_METABOLIC_PROCESS                                                           | 38   | 1.874 | 0.000     | 0.009     |

|                                                                                          |     |        |       |       |
|------------------------------------------------------------------------------------------|-----|--------|-------|-------|
| GO_PYRIMIDINE_NUCLEOSIDE_BIOSYNTHETIC_PROCESS                                            | 25  | 1.874  | 0.000 | 0.009 |
| GO_PYRIMIDINE_NUCLEOSIDE_TRIPHOSPHATE_METABOLIC_PROCESS                                  | 19  | 1.872  | 0.000 | 0.009 |
| GO_CARBOHYDRATE_BIOSYNTHETIC_PROCESS                                                     | 80  | 1.865  | 0.000 | 0.010 |
| GO_LIPOSACCHARIDE_METABOLIC_PROCESS                                                      | 68  | 1.865  | 0.000 | 0.010 |
| GO_AMINO_ACID_ACTIVATION                                                                 | 41  | 1.861  | 0.000 | 0.010 |
| GO_COFACTOR_BINDING                                                                      | 167 | 1.859  | 0.000 | 0.010 |
| GO_SULFUR_AMINO_ACID_METABOLIC_PROCESS                                                   | 28  | 1.850  | 0.000 | 0.012 |
| GO_FATTY_ACID_CATABOLIC_PROCESS                                                          | 51  | 1.847  | 0.000 | 0.012 |
| GO_CELLULAR_KETONE_METABOLIC_PROCESS                                                     | 43  | 1.846  | 0.000 | 0.012 |
| GO_SMALL_MOLECULE_BIOSYNTHETIC_PROCESS                                                   | 260 | 1.842  | 0.000 | 0.012 |
| GO_HYDROLASE_ACTIVITY_ACTING_ON_CARBON_NITROGEN_BUT_NOT_PEPTIDE_BONDS_IN_CYCLIC_AMIDINES | 26  | 1.837  | 0.002 | 0.013 |
| GO_ENERGY_COUPLED_PROTON_TRANSPORT_DOWN_ELECTROCHEMICAL_GRADIENT                         | 19  | 1.837  | 0.001 | 0.013 |
| GO_ORGANOPHOSPHATE_BIOSYNTHETIC_PROCESS                                                  | 288 | 1.824  | 0.000 | 0.016 |
| GO_ATP_BIOSYNTHETIC_PROCESS                                                              | 26  | 1.821  | 0.002 | 0.016 |
| GO_MONOCARBOXYLIC_ACID_CATABOLIC_PROCESS                                                 | 61  | 1.821  | 0.000 | 0.016 |
| GO_CELLULAR_AMINO_ACID_BIOSYNTHETIC_PROCESS                                              | 53  | 1.818  | 0.000 | 0.017 |
| GO_DEOXYRIBONUCLEOTIDE_METABOLIC_PROCESS                                                 | 29  | 1.815  | 0.000 | 0.017 |
| GO_COENZYME_BINDING                                                                      | 121 | 1.814  | 0.000 | 0.017 |
| GO_LYSINE_ACETYLATED_HISTONE_BINDING                                                     | 16  | -2.248 | 0.000 | 0.017 |
| GO_CYTOCHROME_COMPLEX_ASSEMBLY                                                           | 16  | 1.815  | 0.003 | 0.017 |
| GO_PROTON_TRANSPORTING_ATP_SYNTHASE_COMPLEX                                              | 20  | 1.812  | 0.000 | 0.017 |
| GO_TRNA_METABOLIC_PROCESS                                                                | 138 | 1.806  | 0.000 | 0.018 |
| GO_GLUCOSE_6_PHOSPHATE_METABOLIC_PROCESS                                                 | 15  | 1.807  | 0.004 | 0.018 |
| GO_LIGASE_ACTIVITY_FORMING_CARBON_OXYGEN_BONDS                                           | 38  | 1.801  | 0.002 | 0.020 |
| GO_CELLULAR_AMINO_ACID_METABOLIC_PROCESS                                                 | 198 | 1.800  | 0.000 | 0.020 |
| GO_MONOSACCHARIDE_METABOLIC_PROCESS                                                      | 118 | 1.793  | 0.000 | 0.022 |
| GO_PYRIMIDINE_NUCLEOSIDE_METABOLIC_PROCESS                                               | 37  | 1.788  | 0.000 | 0.023 |
| GO_COFACTOR_BIOSYNTHETIC_PROCESS                                                         | 123 | 1.785  | 0.000 | 0.023 |
| GO_METAL_CLUSTER_BINDING                                                                 | 53  | 1.780  | 0.000 | 0.025 |
| GO_4_IRON_4_SULFUR_CLUSTER_BINDING                                                       | 36  | 1.778  | 0.000 | 0.025 |
| GO_NUCLEOTIDE_SUGAR_METABOLIC_PROCESS                                                    | 28  | 1.779  | 0.000 | 0.025 |
| GO_TRNA_PROCESSING                                                                       | 88  | 1.774  | 0.000 | 0.026 |
| GO_REGULATION_OF_CELLULAR_AMINO_ACID_METABOLIC_PROCESS                                   | 53  | 1.771  | 0.000 | 0.027 |
| GO_LIGASE_ACTIVITY_FORMING_CARBON_NITROGEN_BONDS                                         | 38  | 1.770  | 0.000 | 0.027 |
| GO_VOLTAGE_GATED_POTASSIUM_CHANNEL_ACTIVITY                                              | 15  | -2.199 | 0.000 | 0.027 |
| GO_FATTY_ACYL_COA_BINDING                                                                | 24  | 1.768  | 0.000 | 0.027 |
| GO_CELLULAR_MODIFIED_AMINO_ACID_BIOSYNTHETIC_PROCESS                                     | 33  | 1.765  | 0.002 | 0.028 |
| GO_MEMBRANE_LIPID_BIOSYNTHETIC_PROCESS                                                   | 63  | 1.763  | 0.001 | 0.029 |
| GO_MONOSACCHARIDE_BINDING                                                                | 43  | 1.760  | 0.001 | 0.030 |
| GO_AMIDE_BIOSYNTHETIC_PROCESS                                                            | 407 | 1.755  | 0.000 | 0.031 |
| GO_NUCLEOTIDE_SUGAR_BIOSYNTHETIC_PROCESS                                                 | 18  | 1.750  | 0.004 | 0.033 |
| GO_MITOCHONDRIAL_TRANSMEMBRANE_TRANSPORT                                                 | 49  | 1.751  | 0.000 | 0.033 |
| GO_PYRIMIDINE_RIBONUCLEOSIDE_METABOLIC_PROCESS                                           | 26  | 1.749  | 0.003 | 0.033 |
| GO_NON_CANONICAL_WNT_SIGNALING_PATHWAY                                                   | 100 | 1.743  | 0.000 | 0.035 |
| GO_RIBOSOME                                                                              | 202 | 1.741  | 0.000 | 0.036 |
| GO_MEMBRANE_LIPID_METABOLIC_PROCESS                                                      | 106 | 1.740  | 0.000 | 0.036 |
| GO_PEPTIDE_METABOLIC_PROCESS                                                             | 435 | 1.739  | 0.000 | 0.036 |
| GO_GLYCOSPHINGOLIPID_METABOLIC_PROCESS                                                   | 39  | 1.735  | 0.001 | 0.038 |
| GO_LIPID_OXIDATION                                                                       | 48  | 1.734  | 0.000 | 0.038 |
| GO_AEROBIC_RESPIRATION                                                                   | 48  | 1.735  | 0.003 | 0.038 |
| GO_CARBON_CARBON_LYASE_ACTIVITY                                                          | 35  | 1.734  | 0.000 | 0.038 |
| GO_EXTRACELLULAR_MATRIX_BINDING                                                          | 18  | -2.139 | 0.000 | 0.038 |
| GO_CERAMIDE_BIOSYNTHETIC_PROCESS                                                         | 21  | 1.728  | 0.004 | 0.040 |
| GO_CELLULAR_AMINO_ACID_CATABOLIC_PROCESS                                                 | 61  | 1.728  | 0.001 | 0.040 |
| GO_COENZYME_BIOSYNTHETIC_PROCESS                                                         | 89  | 1.729  | 0.000 | 0.040 |
| GO_PROTON_TRANSPORTING_TWO_SECTOR_ATPASE_COMPLEX_PROTON_TRANSPORTING_DOMAIN              | 17  | 1.724  | 0.003 | 0.041 |
| GO_STRUCTURAL_CONSTITUENT_OF_RIBOSOME                                                    | 188 | 1.722  | 0.000 | 0.042 |
| GO_ORGANIC_ACID_BIOSYNTHETIC_PROCESS                                                     | 140 | 1.721  | 0.000 | 0.042 |
| GO_ALPHA_AMINO_ACID_BIOSYNTHETIC_PROCESS                                                 | 49  | 1.713  | 0.001 | 0.046 |
| GO_CARBOHYDRATE_CATABOLIC_PROCESS                                                        | 75  | 1.710  | 0.000 | 0.048 |
| GO_GLYCOLIPID_BIOSYNTHETIC_PROCESS                                                       | 36  | 1.709  | 0.002 | 0.048 |
| GO_OLFACTORY_RECEPTOR_ACTIVITY                                                           | 15  | -2.094 | 0.000 | 0.048 |
| GO_HYDROGEN_ION_TRANSMEMBRANE_TRANSPORT                                                  | 68  | 1.706  | 0.001 | 0.049 |
| GO_SULFUR_COMPOUND_METABOLIC_PROCESS                                                     | 211 | 1.701  | 0.000 | 0.049 |
| GO ASPARTATE_FAMILY_AMINO_ACID_BIOSYNTHETIC_PROCESS                                      | 16  | 1.703  | 0.004 | 0.049 |
| GO_DEOXYRIBOSE_PHOSPHATE_CATABOLIC_PROCESS                                               | 20  | 1.701  | 0.009 | 0.049 |
| GO_HEXOSE_METABOLIC_PROCESS                                                              | 103 | 1.705  | 0.000 | 0.049 |
| GO_OXIDOREDUCTION_COENZYME_METABOLIC_PROCESS                                             | 78  | 1.703  | 0.001 | 0.049 |
| GO ASPARTATE_FAMILY_AMINO_ACID_METABOLIC_PROCESS                                         | 33  | 1.702  | 0.001 | 0.049 |
| GO_PHAGOCYTIC_CUP                                                                        | 15  | 1.705  | 0.011 | 0.049 |
| GO_REGULATION_OF_ESTABLISHMENT_OF_PLANAR_POLARITY                                        | 78  | 1.704  | 0.001 | 0.049 |
| GO_NUCLEOTIDE_PHOSPHORYLATION                                                            | 43  | 1.697  | 0.001 | 0.050 |
| GO_ALDO_KETO_REDUCTASE_NADP_ACTIVITY                                                     | 15  | 1.699  | 0.007 | 0.050 |
| GO_PEROXISOME_ORGANIZATION                                                               | 25  | 1.699  | 0.004 | 0.050 |
| GO PEPTIDYL ASPARAGINE MODIFICATION                                                      | 29  | 1.698  | 0.005 | 0.050 |
| GO_MICROBODY_PART                                                                        | 61  | 1.696  | 0.001 | 0.050 |
| GO_THIOLESTER_HYDROLASE_ACTIVITY                                                         | 21  | 1.693  | 0.003 | 0.052 |

|                                                                                        |     |        |       |       |
|----------------------------------------------------------------------------------------|-----|--------|-------|-------|
| GO_GLYCOSYL_COMPOUND_CATABOLIC_PROCESS                                                 | 29  | 1.689  | 0.002 | 0.053 |
| GO_MONOSACCHARIDE_CATABOLIC_PROCESS                                                    | 41  | 1.687  | 0.002 | 0.054 |
| GO_CELLULAR_MODIFIED_AMINO_ACID_METABOLIC_PROCESS                                      | 114 | 1.684  | 0.000 | 0.056 |
| GO_CYSTEINE_TYPE_ENDOPEPTIDASE_INHIBITOR_ACTIVITY_INVOLVED_IN_APOPTOTIC_PROCESS        | 18  | 1.683  | 0.008 | 0.056 |
| GO_CYSTEINE_TYPE_ENDOPEPTIDASE_INHIBITOR_ACTIVITY                                      | 27  | 1.680  | 0.007 | 0.057 |
| GO_CARBOHYDRATE_DERIVATIVE_BIOSYNTHETIC_PROCESS                                        | 357 | 1.678  | 0.000 | 0.058 |
| GO_PORPHYRIN_CONTAINING_COMPOUND_METABOLIC_PROCESS                                     | 26  | 1.677  | 0.003 | 0.059 |
| GO_ENDONUCLEASE_ACTIVITY                                                               | 77  | 1.675  | 0.002 | 0.060 |
| GO_GPI_ANCHOR_METABOLIC_PROCESS                                                        | 24  | 1.673  | 0.006 | 0.061 |
| GO_OXIDOREDUCTASE_ACTIVITY_ACTING_ON_THE_CH_CH_GROUP_OF_DONORS_NAD_OR_NADP_AS_ACCEPTOR | 15  | 1.671  | 0.011 | 0.062 |
| GO_PYRIMIDINE_RIBONUCLEOTIDE_METABOLIC_PROCESS                                         | 20  | 1.668  | 0.011 | 0.064 |
| GO_CARBOXY_LYASE_ACTIVITY                                                              | 24  | 1.666  | 0.005 | 0.065 |
| GO_ALPHA_AMINO_ACID_METABOLIC_PROCESS                                                  | 126 | 1.661  | 0.000 | 0.068 |
| GO_PROTEASOME_ACCESSORY_COMPLEX                                                        | 24  | 1.660  | 0.005 | 0.068 |
| GO_PROTON_TRANSPORTING_TWO_SECTOR_ATPASE_COMPLEX                                       | 38  | 1.660  | 0.004 | 0.069 |
| GO_MICROBODY                                                                           | 93  | 1.656  | 0.000 | 0.071 |
| GO_PROTEIN_HOMOTETRAMERIZATION                                                         | 42  | 1.656  | 0.005 | 0.071 |
| GO_ANAPHASE_PROMOTING_COMPLEX_DEPENDENT_CATABOLIC_PROCESS                              | 66  | 1.654  | 0.002 | 0.072 |
| GO_SPHINGOLIPID_METABOLIC_PROCESS                                                      | 77  | 1.654  | 0.002 | 0.072 |
| GO_GLYOXYLATE_METABOLIC_PROCESS                                                        | 19  | 1.651  | 0.009 | 0.073 |
| GO_TELOMERE_MAINTENANCE_VIA_RECOMBINATION                                              | 27  | 1.651  | 0.007 | 0.073 |
| GO_NUCLEASE_ACTIVITY                                                                   | 135 | 1.649  | 0.000 | 0.074 |
| GO_GLUTATHIONE_METABOLIC_PROCESS                                                       | 33  | 1.647  | 0.009 | 0.074 |
| GO_PYRIMIDINE_NUCLEOBASE_METABOLIC_PROCESS                                             | 16  | 1.648  | 0.011 | 0.074 |
| GO_INTRAMOLECULAR_TRANSFERASE_ACTIVITY                                                 | 23  | 1.647  | 0.012 | 0.074 |
| GO_MANNOSYLATION                                                                       | 22  | 1.648  | 0.009 | 0.074 |
| GO_DEAMINASE_ACTIVITY                                                                  | 25  | 1.641  | 0.006 | 0.078 |
| GO_POSITIVE_REGULATION_OF_LIGASE_ACTIVITY                                              | 92  | 1.639  | 0.000 | 0.080 |
| GO_LENS_DEVELOPMENT_IN_CAMERA_TYPE_EYE                                                 | 31  | -2.024 | 0.000 | 0.081 |
| GO_OXIDOREDUCTASE_ACTIVITY_ACTING_ON_A_HEME_GROUP_OF_DONORS                            | 18  | 1.637  | 0.006 | 0.081 |
| GO_POSITIVE_REGULATION_OF_RECEPTOR_ACTIVITY                                            | 25  | 1.635  | 0.007 | 0.082 |
| GO_PYRIMIDINE_DEOXYRIBONUCLEOTIDE_METABOLIC_PROCESS                                    | 16  | 1.635  | 0.009 | 0.082 |
| GO_MONOCARBOXYLIC_ACID_METABOLIC_PROCESS                                               | 275 | 1.634  | 0.000 | 0.083 |
| GO_REGULATION_OF_RESPONSE_TO_REACTIVE_OXYGEN_SPECIES                                   | 23  | 1.631  | 0.010 | 0.085 |
| GO_NEGATIVE_REGULATION_OF_GENE_SILENCING                                               | 15  | -1.982 | 0.009 | 0.087 |
| GO_EXOPEPTIDASE_ACTIVITY                                                               | 56  | 1.628  | 0.006 | 0.087 |
| GO_RIBOSOMAL_SUBUNIT                                                                   | 151 | 1.626  | 0.001 | 0.089 |
| GO_CELLULAR_PROTEIN_COMPLEX_ASSEMBLY                                                   | 228 | 1.621  | 0.000 | 0.093 |
| GO_DIGESTIVE_SYSTEM_PROCESS                                                            | 28  | -1.984 | 0.006 | 0.093 |
| GO_CERAMIDE_METABOLIC_PROCESS                                                          | 40  | 1.619  | 0.008 | 0.094 |
| GO_HEME_METABOLIC_PROCESS                                                              | 22  | 1.617  | 0.006 | 0.096 |
| GO_ISOMERASE_ACTIVITY                                                                  | 102 | 1.616  | 0.000 | 0.096 |
| GO_DIGESTION                                                                           | 41  | -1.958 | 0.000 | 0.096 |
| GO_REGULATION_OF_CD4_POSITIVE_ALPHA_BETA_T_CELL_ACTIVATION                             | 27  | -1.895 | 0.005 | 0.097 |
| GO_ALPHA_AMINO_ACID_CATABOLIC_PROCESS                                                  | 46  | 1.613  | 0.004 | 0.097 |
| GO_RESPONSE_TO_AMINE                                                                   | 26  | 1.614  | 0.012 | 0.098 |
| GO_ADP_METABOLIC_PROCESS                                                               | 34  | 1.614  | 0.011 | 0.098 |
| GO_HYDROGEN_TRANSPORT                                                                  | 91  | 1.613  | 0.000 | 0.098 |
| GO_SENSORY_PERCEPTION_OF_CHEMICAL_STIMULUS                                             | 42  | -1.899 | 0.000 | 0.098 |
| GO_TRANSCRIPTION_COFACTOR_BINDING                                                      | 19  | -1.991 | 0.000 | 0.098 |
| GO GRANULOCYTE MIGRATION                                                               | 43  | -1.885 | 0.000 | 0.099 |
| GO_REGULATION_OF_STEROID_BIOSYNTHETIC_PROCESS                                          | 28  | -1.918 | 0.000 | 0.100 |
| GO_PHOSPHATIDYLINOSITOL_3_KINASE_BINDING                                               | 20  | 1.608  | 0.014 | 0.101 |
| GO_DISULFIDE_OXIDOREDUCTASE_ACTIVITY                                                   | 22  | 1.608  | 0.020 | 0.101 |
| GO_NEGATIVE_REGULATION_OF_LEUKOCYTE_DIFFERENTIATION                                    | 50  | -1.923 | 0.000 | 0.103 |
| GO_REGULATION_OF_VASOCONSTRICTION                                                      | 21  | -1.900 | 0.004 | 0.103 |
| GO_MITOCHONDRION_ORGANIZATION                                                          | 458 | 1.603  | 0.000 | 0.104 |
| GO_PTERIDINE_CONTAINING_COMPOUND_BIOSYNTHETIC_PROCESS                                  | 15  | 1.602  | 0.017 | 0.104 |
| GO_OLIGODENDROCYTE_DEVELOPMENT                                                         | 15  | 1.604  | 0.019 | 0.105 |
| GO_MICROBODY_MEMBRANE                                                                  | 42  | 1.603  | 0.011 | 0.105 |
| GO_REGULATION_OF_ASTROCYTE_DIFFERENTIATION                                             | 15  | -1.929 | 0.004 | 0.105 |
| GO_SERINE_FAMILY_AMINO_ACID_METABOLIC_PROCESS                                          | 23  | 1.600  | 0.015 | 0.105 |
| GO_NUCLEOSIDE_BISPHOSPHATE_METABOLIC_PROCESS                                           | 21  | 1.603  | 0.009 | 0.105 |
| GO_HEME_BIOSYNTHETIC_PROCESS                                                           | 18  | 1.603  | 0.012 | 0.105 |
| GO_CARBOHYDRATE_BINDING                                                                | 130 | 1.601  | 0.001 | 0.105 |
| GO_REGULATION_OF_VIRAL_ENTRY_INTO_HOST_CELL                                            | 19  | 1.598  | 0.015 | 0.106 |
| GO_CARBOXYPEPTIDASE_ACTIVITY                                                           | 16  | 1.599  | 0.016 | 0.106 |
| GO_OXIDOREDUCTASE_ACTIVITY_ACTING_ON_A_SULFUR_GROUP_OF_DONORS                          | 36  | 1.598  | 0.011 | 0.106 |
| GO_PYRUVATE_METABOLIC_PROCESS                                                          | 43  | 1.596  | 0.014 | 0.107 |
| GO_REGULATION_OF_CELLULAR_AMINE_METABOLIC_PROCESS                                      | 67  | 1.595  | 0.006 | 0.107 |
| GO_NEGATIVE_REGULATION_OF_OSTEOCLAST_DIFFERENTIATION                                   | 17  | -1.861 | 0.000 | 0.108 |
| GO_PTERIDINE_CONTAINING_COMPOUND_METABOLIC_PROCESS                                     | 26  | 1.595  | 0.013 | 0.108 |
| GO_REGULATION_OF_SMOOTH_MUSCLE_CONTRACTION                                             | 19  | -1.865 | 0.000 | 0.108 |
| GO_REGULATION_OF_ALCOHOL_BIOSYNTHETIC_PROCESS                                          | 26  | -1.901 | 0.006 | 0.108 |
| GO_MANNOSYLTRANSFERASE_ACTIVITY                                                        | 18  | 1.593  | 0.021 | 0.109 |
| GO_OLIGODENDROCYTE_DIFFERENTIATION                                                     | 24  | 1.593  | 0.018 | 0.109 |
| GO_GLUTATHIONE_TRANSFERASE_ACTIVITY                                                    | 18  | 1.591  | 0.023 | 0.110 |

|                                                                                                         |     |        |       |       |
|---------------------------------------------------------------------------------------------------------|-----|--------|-------|-------|
| GO_REGULATION_OF_PROTEIN_AUTOPHOSPHORYLATION                                                            | 21  | 1.588  | 0.022 | 0.113 |
| GO_REGULATION_OF_IMMUNOGLOBULIN_PRODUCTION                                                              | 29  | -1.929 | 0.005 | 0.113 |
| GO_TRANS_GOLGI_NETWORK_TRANSPORT_VESICLE                                                                | 19  | 1.586  | 0.021 | 0.115 |
| GO_SULFUR_COMPOUND_BIOSYNTHETIC_PROCESS                                                                 | 121 | 1.585  | 0.001 | 0.115 |
| GO_GLUCOSE_METABOLIC_PROCESS                                                                            | 78  | 1.584  | 0.003 | 0.116 |
| GO_CARBOHYDRATE_METABOLIC_PROCESS                                                                       | 387 | 1.582  | 0.000 | 0.117 |
| GO_NEGATIVE_REGULATION_OF_FAT_CELL_DIFFERENTIATION                                                      | 25  | -1.841 | 0.000 | 0.118 |
| GO_ORGANELLE_ENVELOPE_LUMEN                                                                             | 64  | 1.581  | 0.004 | 0.118 |
| GO_RESPONSE_TO_ANTIOTIBIC                                                                               | 31  | 1.580  | 0.011 | 0.119 |
| GO_REGULATION_OF_T_HELPER_CELL_DIFFERENTIATION                                                          | 16  | -1.832 | 0.008 | 0.120 |
| GO_SPHINGOLIPID_BIOSYNTHETIC_PROCESS                                                                    | 38  | 1.578  | 0.012 | 0.121 |
| GO_NEGATIVE_REGULATION_OF_REPRODUCTIVE_PROCESS                                                          | 22  | 1.577  | 0.020 | 0.121 |
| GO_INTRINSIC_COMPONENT_OF_ORGANELLE_MEMBRANE                                                            | 199 | 1.575  | 0.000 | 0.123 |
| GO_RNA_PHOSPHODIESTER_BOND_HYDROLYSIS_ENDONUCLEOLYTIC                                                   | 44  | 1.571  | 0.009 | 0.128 |
| GO_NEGATIVE_REGULATION_OF_BMP_SIGNALING_PATHWAY                                                         | 16  | -1.805 | 0.012 | 0.130 |
| GO_REGULATION_OF_RYANODINE_SENSITIVE_CALCIIUM_RELEASE_CHANNEL_ACTIVITY                                  | 16  | 1.568  | 0.031 | 0.131 |
| GO_ENDORIBONUCLEASE_ACTIVITY                                                                            | 38  | 1.566  | 0.016 | 0.131 |
| GO_HEXOSE_CATABOLIC_PROCESS                                                                             | 34  | 1.566  | 0.012 | 0.132 |
| GO_TETRAHYDROFOLATE_METABOLIC_PROCESS                                                                   | 16  | 1.567  | 0.019 | 0.132 |
| GO_PEPTIDE_CROSS_LINKING                                                                                | 15  | -1.807 | 0.012 | 0.133 |
| GO_MAGNESIUM_ION_BINDING                                                                                | 135 | 1.563  | 0.002 | 0.133 |
| GO_PROTEIN_N_LINKED_GLYCOSYLATION                                                                       | 55  | 1.563  | 0.015 | 0.134 |
| GO_SKELETAL_MUSCLE_CONTRACTION                                                                          | 20  | -1.811 | 0.008 | 0.134 |
| GO_PROTEIN_TETRAMERIZATION                                                                              | 100 | 1.560  | 0.001 | 0.137 |
| GO_MICROBODY_LUMEN                                                                                      | 26  | 1.559  | 0.021 | 0.138 |
| GO_NUCLEOSIDE_DIPHOSPHATE_METABOLIC_PROCESS                                                             | 56  | 1.553  | 0.010 | 0.145 |
| GO_HYDROLASE_ACTIVITY_HYDROLYZING_N_GLYCOSYL_COMPOUNDS                                                  | 17  | 1.550  | 0.030 | 0.148 |
| GO_LARGE_RIBOSOMAL_SUBUNIT                                                                              | 87  | 1.550  | 0.003 | 0.148 |
| GO_BRANCHED_CHAIN_AMINO_ACID_METABOLIC_PROCESS                                                          | 21  | 1.547  | 0.022 | 0.152 |
| GO_POSITIVE_REGULATION_OF_CYSSTEINE_TYPE_ENDOPEPTIDASE_ACTIVITY_INVOLVED_IN_APOPTOTIC_SIGNALING_PATHWAY | 15  | 1.546  | 0.034 | 0.153 |
| GO_PROTEIN_PHOSPHORYLATED_AMINO_ACID_BINDING                                                            | 18  | 1.544  | 0.021 | 0.154 |
| GO_ATP_GENERATION_FROM_ADP                                                                              | 28  | 1.542  | 0.022 | 0.157 |
| GO_SKELETAL_MUSCLE_TISSUE_REGENERATION                                                                  | 15  | -1.771 | 0.000 | 0.157 |
| GO_DICARBOXYLIC_ACID_TRANSMEMBRANE_TRANSPORTER_ACTIVITY                                                 | 15  | 1.541  | 0.028 | 0.158 |
| GO_REGULATION_OF_ACTIN_FILAMENT_LENGTH                                                                  | 99  | 1.540  | 0.005 | 0.159 |
| GO_PEPTIDE_ANTIEN_BINDING                                                                               | 25  | -1.750 | 0.000 | 0.161 |
| GO_REGULATION_OF_LIGASE_ACTIVITY                                                                        | 108 | 1.537  | 0.000 | 0.162 |
| GO_REGULATION_OF_TYPE_2_IMMUNE_RESPONSE                                                                 | 17  | -1.772 | 0.030 | 0.162 |
| GO_REGULATION_OF_FAT_CELL_DIFFERENTIATION                                                               | 52  | -1.761 | 0.000 | 0.162 |
| GO_NEGATIVE_REGULATION_OF_MYELOID_LEUKOCYTE_DIFFERENTIATION                                             | 29  | -1.745 | 0.000 | 0.162 |
| GO_DNA_DIRECTED_DNA_POLYMERASE_ACTIVITY                                                                 | 22  | 1.535  | 0.024 | 0.163 |
| GO_POSITIVE_REGULATION_OF_RESPONSE_TO_BIOTIC_STIMULUS                                                   | 24  | 1.536  | 0.025 | 0.163 |
| GO_NADP_BINDING                                                                                         | 25  | 1.536  | 0.026 | 0.164 |
| GO_NEURAL_CREST_CELL_MIGRATION                                                                          | 18  | -1.754 | 0.012 | 0.166 |
| GO_LEUKOCYTE_CHEMOTAXIS                                                                                 | 60  | -1.750 | 0.000 | 0.166 |
| GO_REGULATION_OF_PROTEIN_POLYMERIZATION                                                                 | 114 | 1.533  | 0.004 | 0.166 |
| GO_THREONINE_TYPE_PEPTIDASE_ACTIVITY                                                                    | 18  | 1.532  | 0.031 | 0.166 |
| GO_ORGANELLAR_LARGE_RIBOSOMAL_SUBUNIT                                                                   | 30  | 1.533  | 0.025 | 0.167 |
| GO_TETRAPYRROLE_BIOSYNTHETIC_PROCESS                                                                    | 23  | 1.531  | 0.028 | 0.167 |
| GO_PROTEIN_TARGETING_TO_MITOCHONDRION                                                                   | 42  | 1.530  | 0.020 | 0.168 |
| GO_FOLIC_ACID_CONTAINING_COMPOUND_METABOLIC_PROCESS                                                     | 21  | 1.529  | 0.030 | 0.168 |
| GO_NADP_METABOLIC_PROCESS                                                                               | 19  | 1.527  | 0.034 | 0.172 |
| GO_PYRIMIDINE_CONTAINING_COMPOUND_CATABOLIC_PROCESS                                                     | 24  | 1.524  | 0.032 | 0.174 |
| GO_REGULATION_OF_RESPONSE_TO_OXIDATIVE_STRESS                                                           | 45  | 1.524  | 0.028 | 0.175 |
| GO_UBIQUITIN_DEPENDENT_PROTEIN_CATABOLIC_PROCESS_VIA_THE_MULTIVESICULAR_BODY_SORTING_PATHWAY            | 15  | 1.522  | 0.038 | 0.176 |
| GO_NEGATIVE_REGULATION_OF_CALCIIUM_MEDIATED_SIGNALING                                                   | 15  | 1.522  | 0.038 | 0.176 |
| GO_CHEMOKINE_MEDIATED_SIGNALING_PATHWAY                                                                 | 26  | -1.730 | 0.006 | 0.176 |
| GO_FC_EPSILON_RECEPTOR_SIGNALING_PATHWAY                                                                | 111 | 1.523  | 0.004 | 0.176 |
| GO_MITOTIC_RECOMBINATION                                                                                | 29  | 1.520  | 0.018 | 0.178 |
| GO_RIBONUCLEOSIDE_CATABOLIC_PROCESS                                                                     | 18  | 1.519  | 0.032 | 0.180 |
| GO_ONE_CARBON_METABOLIC_PROCESS                                                                         | 22  | 1.518  | 0.032 | 0.181 |
| GO_FC_RECEPTOR_SIGNALING_PATHWAY                                                                        | 157 | 1.516  | 0.003 | 0.183 |
| GO_GLOMERULUS_DEVELOPMENT                                                                               | 15  | 1.516  | 0.039 | 0.183 |
| GO_PERIKARYON                                                                                           | 43  | 1.514  | 0.022 | 0.185 |
| GO_NUCLEOBASE_CONTAINING_SMALL_MOLECULE_INTERCONVERSION                                                 | 15  | 1.513  | 0.038 | 0.185 |
| GO_CLATHRIN_VESICLE_COAT                                                                                | 19  | 1.512  | 0.035 | 0.186 |
| GO_DENDRITIC_CELL_DIFFERENTIATION                                                                       | 18  | -1.716 | 0.022 | 0.188 |
| GO_GLUCAN_BIOSYNTHETIC_PROCESS                                                                          | 17  | 1.509  | 0.036 | 0.190 |
| GO_RIBONUCLEASE_ACTIVITY                                                                                | 72  | 1.508  | 0.014 | 0.192 |
| GO_ORGANIC_HYDROXY_COMPOUND_CATABOLIC_PROCESS                                                           | 34  | 1.506  | 0.041 | 0.194 |
| GO_ALDITOL_PHOSPHATE_METABOLIC_PROCESS                                                                  | 15  | 1.504  | 0.037 | 0.197 |
| GO_CELLULAR_RESPONSE_TO_HEAT                                                                            | 21  | -1.703 | 0.014 | 0.200 |
| GO_FATTY_ACYL_COA_METABOLIC_PROCESS                                                                     | 33  | 1.502  | 0.027 | 0.201 |
| GO_G_PROTEIN_COUPLED_RECEPTOR_ACTIVITY                                                                  | 132 | -1.699 | 0.000 | 0.201 |
| GO_NIK_NF_KAPPAB_SIGNALING                                                                              | 74  | 1.500  | 0.011 | 0.203 |

|                                                                                                   |     |        |       |       |
|---------------------------------------------------------------------------------------------------|-----|--------|-------|-------|
| GO_TRANSMISSION_OF_NERVE_IMPULSE                                                                  | 15  | -1.685 | 0.008 | 0.204 |
| GO_REGULATION_OF_MEMBRANE_DEPOLARIZATION                                                          | 18  | 1.498  | 0.033 | 0.205 |
| GO_RUFFLE_ORGANIZATION                                                                            | 15  | 1.499  | 0.043 | 0.205 |
| GO_HYDROLASE_ACTIVITY_ACTING_ON_GLYCOSYL_BONDS                                                    | 72  | 1.497  | 0.013 | 0.206 |
| GO_PIGMENT_GRANULE                                                                                | 82  | 1.497  | 0.011 | 0.207 |
| GO_REGULATION_OF_AXON_GUIDANCE                                                                    | 17  | -1.691 | 0.012 | 0.207 |
| GO_HYDROGEN_EXPORTING_ATPASE_ACTIVITY                                                             | 21  | 1.496  | 0.032 | 0.207 |
| GO_POSITIVE_REGULATION_OF_CYTOKINE_BIOSYNTHETIC_PROCESS                                           | 34  | -1.686 | 0.006 | 0.208 |
| GO_CELL_CELL_CONTACT_ZONE                                                                         | 30  | 1.494  | 0.034 | 0.209 |
| GO_NUCLEOTIDE_EXCISION_REPAIR_DNA_INCISION                                                        | 34  | 1.493  | 0.035 | 0.210 |
| GO_POSITIVE_REGULATION_OF_CD4_POSITIVE_ALPHA_BETA_T_CELL_ACTIVATION                               | 19  | -1.677 | 0.009 | 0.211 |
| GO_WNT_SIGNALING_PATHWAY_CALCIIUM_MODULATING_PATHWAY                                              | 27  | 1.493  | 0.035 | 0.211 |
| GO_HYDROLASE_ACTIVITY_ACTING_ON_ESTER_BONDS                                                       | 422 | 1.492  | 0.000 | 0.212 |
| GO_DNA_RECOMBINATION                                                                              | 134 | 1.491  | 0.009 | 0.212 |
| GO_ORGANIC_HYDROXY_COMPOUND_BIOSYNTHETIC_PROCESS                                                  | 96  | 1.490  | 0.007 | 0.213 |
| GO_REGULATION_OF_GLIAL_CELL_DIFFERENTIATION                                                       | 25  | -1.668 | 0.005 | 0.214 |
| GO_3_5_EXONUCLEASE_ACTIVITY                                                                       | 39  | 1.489  | 0.031 | 0.215 |
| GO_ACTIN_MYOSIN_FILAMENT_SLIDING                                                                  | 15  | -1.663 | 0.030 | 0.216 |
| GO_INACTIVATION_OF_MAPK_ACTIVITY                                                                  | 20  | -1.655 | 0.014 | 0.217 |
| GO_ACTIN_FILAMENT_BASED_MOVEMENT                                                                  | 36  | -1.669 | 0.000 | 0.218 |
| GO_FATTY_ACID_BETA_OXIDATION_USING_ACYL_COA_DEHYDROGENASE                                         | 15  | 1.487  | 0.043 | 0.218 |
| GO_HISTONE_H4_ACETYLATION                                                                         | 33  | 1.486  | 0.033 | 0.218 |
| GO_VESICLE_COAT                                                                                   | 38  | 1.485  | 0.028 | 0.219 |
| GO_BONE_MINERALIZATION                                                                            | 15  | -1.657 | 0.032 | 0.219 |
| GO_REGULATION_OF_ALPHA_BETA_T_CELL_DIFFERENTIATION                                                | 32  | -1.631 | 0.025 | 0.224 |
| GO_OLIGOSACCHARIDE_LIPID_INTERMEDIATE_BIOSYNTHETIC_PROCESS                                        | 17  | 1.481  | 0.044 | 0.226 |
| GO_PRESYNAPTIC_MEMBRANE                                                                           | 20  | -1.646 | 0.018 | 0.226 |
| GO_RESPONSE_TO_INTERFERON_ALPHA                                                                   | 16  | 1.480  | 0.049 | 0.227 |
| GO_CADHERIN_BINDING                                                                               | 17  | -1.632 | 0.030 | 0.228 |
| GO_REGULATION_OF_PROTEIN_UBIQUITINATION_INVOLVED_IN_UBIQUITIN_DEPENDENT_PROTEIN_CATABOLIC_PROCESS | 85  | 1.478  | 0.016 | 0.228 |
| GO_PROTEIN_LOCALIZATION_TO_MITOCHONDRION                                                          | 56  | 1.478  | 0.027 | 0.229 |
| GO_METALLO_SULFUR_CLUSTER_ASSEMBLY                                                                | 16  | 1.479  | 0.046 | 0.229 |
| GO_ACTIN_MEDIATED_CELL_CONTRACTION                                                                | 22  | -1.640 | 0.010 | 0.229 |
| GO_NUCLEOTIDE_EXCISION_REPAIR_DNA_GAP_FILLING                                                     | 22  | 1.477  | 0.047 | 0.229 |
| GO_PROTEIN_K63_LINKED_UBIQUITINATION                                                              | 30  | 1.479  | 0.035 | 0.229 |
| GO_POSITIVE_REGULATION_OF_EMBRYONIC_DEVELOPMENT                                                   | 16  | -1.634 | 0.036 | 0.229 |
| GO_MESODERM_DEVELOPMENT                                                                           | 48  | 1.476  | 0.027 | 0.230 |
| GO_ORGANONITROGEN_COMPOUND_CATABOLIC_PROCESS                                                      | 194 | 1.476  | 0.003 | 0.230 |
| GO_SMALL_RIBOSOMAL_SUBUNIT                                                                        | 64  | 1.476  | 0.026 | 0.230 |
| GO_LIGASE_ACTIVITY_FORMING_CARBON_SULFUR_BONDS                                                    | 25  | 1.476  | 0.032 | 0.231 |
| GO_REGULATION_OF_POSTTRANSCRIPTIONAL_GENE_SILENCING                                               | 17  | -1.636 | 0.033 | 0.231 |
| GO_POSITIVE_REGULATION_OF_INTERLEUKIN_2_PRODUCTION                                                | 24  | -1.619 | 0.016 | 0.234 |
| GO_REGULATION_OF_NEURAL_PRECURSOR_CELL_PROLIFERATION                                              | 30  | -1.622 | 0.016 | 0.235 |
| GO_FATTY_ACID_METABOLIC_PROCESS                                                                   | 176 | 1.472  | 0.000 | 0.235 |
| GO_LIPID_BIOSYNTHETIC_PROCESS                                                                     | 305 | 1.472  | 0.000 | 0.236 |
| GO_PRERIBOSOME                                                                                    | 47  | 1.471  | 0.028 | 0.236 |
| GO_NUCLEOTIDE_EXCISION_REPAIR                                                                     | 99  | 1.469  | 0.010 | 0.240 |
| GO_NEGATIVE_REGULATION_OF_CHROMATIN_MODIFICATION                                                  | 31  | -1.591 | 0.006 | 0.249 |
| GO_THIOESTER_METABOLIC_PROCESS                                                                    | 54  | 1.464  | 0.017 | 0.249 |
| GO_DNA_STRAND_ELONGATION_INVOLVED_IN_DNA_REPLICATION                                              | 19  | 1.464  | 0.047 | 0.249 |
| GO_PHOSPHOLIPID_BIOSYNTHETIC_PROCESS                                                              | 149 | 1.463  | 0.005 | 0.249 |
| GO_DNA_DEPENDENT_DNA_REPLICATION                                                                  | 71  | 1.464  | 0.022 | 0.249 |

## HCC vs HD

| NAME                                                | SIZE | NES   | NOM p-val | FDR q-val |
|-----------------------------------------------------|------|-------|-----------|-----------|
| GO_ORGANELLE_INNER_MEMBRANE                         | 398  | 2.200 | 0.000     | 0.001     |
| GO_MITOCHONDRIAL_MATRIX                             | 331  | 2.202 | 0.000     | 0.002     |
| GO_PYRIMIDINE_CONTAINING_COMPOUND_METABOLIC_PROCESS | 59   | 2.207 | 0.000     | 0.002     |
| GO_ORGANELLAR_RIBOSOME                              | 69   | 2.177 | 0.000     | 0.002     |
| GO_QUINONE_METABOLIC_PROCESS                        | 19   | 2.149 | 0.000     | 0.002     |
| GO_TRNA_PROCESSING                                  | 88   | 2.150 | 0.000     | 0.002     |
| GO_SULFUR_AMINO_ACID_METABOLIC_PROCESS              | 28   | 2.233 | 0.000     | 0.002     |
| GO_OXIDOREDUCTASE_COMPLEX                           | 79   | 2.125 | 0.000     | 0.002     |
| GO_HYDRO_LYASE_ACTIVITY                             | 34   | 2.123 | 0.000     | 0.002     |
| GO_CELLULAR_ALDEHYDE_METABOLIC_PROCESS              | 57   | 2.134 | 0.000     | 0.002     |
| GO_MITOCHONDRIAL_PROTEIN_COMPLEX                    | 115  | 2.120 | 0.000     | 0.002     |
| GO_COFACTOR_METABOLIC_PROCESS                       | 233  | 2.129 | 0.000     | 0.002     |
| GO_MITOCHONDRIAL_TRANSLATION                        | 100  | 2.212 | 0.000     | 0.002     |
| GO_CELLULAR_PROTEIN_COMPLEX_DISASSEMBLY             | 106  | 2.155 | 0.000     | 0.002     |
| GO_NUCLEOBASE_METABOLIC_PROCESS                     | 29   | 2.162 | 0.000     | 0.002     |
| GO_TRNA_METABOLIC_PROCESS                           | 138  | 2.113 | 0.000     | 0.002     |
| GO_LYASE_ACTIVITY                                   | 115  | 2.105 | 0.000     | 0.002     |
| GO_TRANSLATIONAL_TERMINATION                        | 90   | 2.233 | 0.000     | 0.002     |
| GO_PYRIMIDINE_NUCLEOTIDE_METABOLIC_PROCESS          | 40   | 2.091 | 0.000     | 0.003     |

|                                                                                        |     |        |       |       |
|----------------------------------------------------------------------------------------|-----|--------|-------|-------|
| GO_PYRIMIDINE_DEOXYRIBONUCLEOTIDE_METABOLIC_PROCESS                                    | 16  | 2.079  | 0.000 | 0.003 |
| GO_DEOXYRIBONUCLEOTIDE_METABOLIC_PROCESS                                               | 29  | 2.249  | 0.000 | 0.003 |
| GO_RECOMBINATIONAL_REPAIR                                                              | 43  | 2.067  | 0.000 | 0.004 |
| GO_NUCLEOBASE_CONTAINING_SMALL_MOLECULE_METABOLIC_PROCESS                              | 361 | 2.055  | 0.000 | 0.004 |
| GO_CARBON_OXYGEN_LYASE_ACTIVITY                                                        | 48  | 2.056  | 0.000 | 0.004 |
| GO_PYRIMIDINE_NUCLEOTIDE_BIOSYNTHETIC_PROCESS                                          | 26  | 2.058  | 0.000 | 0.004 |
| GO_MHC_CLASS_II_PROTEIN_COMPLEX                                                        | 16  | -2.306 | 0.000 | 0.004 |
| GO_VOLTAGE_GATED_POTASSIUM_CHANNEL_ACTIVITY                                            | 15  | -2.327 | 0.000 | 0.004 |
| GO_OLFACTORY_RECEPTOR_ACTIVITY                                                         | 15  | -2.288 | 0.000 | 0.004 |
| GO_COENZYME_METABOLIC_PROCESS                                                          | 181 | 2.035  | 0.000 | 0.005 |
| GO_MITOCHONDRIAL_RESPIRATORY_CHAIN_COMPLEX_ASSEMBLY                                    | 62  | 2.036  | 0.000 | 0.005 |
| GO_DNA_RECOMBINATION                                                                   | 134 | 2.041  | 0.000 | 0.005 |
| GO_ASPARTATE_FAMILY_AMINO_ACID_METABOLIC_PROCESS                                       | 33  | 2.037  | 0.000 | 0.005 |
| GO_MITOCHONDRIAL_RESPIRATORY_CHAIN_COMPLEX_I_BIOGENESIS                                | 48  | 2.038  | 0.000 | 0.005 |
| GO_LIPOSACCHARIDE_METABOLIC_PROCESS                                                    | 68  | 2.007  | 0.000 | 0.007 |
| GO_GLYCOSYL_COMPOUND_METABOLIC_PROCESS                                                 | 261 | 2.009  | 0.000 | 0.007 |
| GO_TRANSCRIPTION_COFACTOR_BINDING                                                      | 19  | -2.336 | 0.000 | 0.007 |
| GO_GLYCOSPHINGOLIPID_METABOLIC_PROCESS                                                 | 39  | 2.010  | 0.000 | 0.007 |
| GO_INNER_MITOCHONDRIAL_MEMBRANE_PROTEIN_COMPLEX                                        | 90  | 1.995  | 0.000 | 0.008 |
| GO_PYRIMIDINE_NUCLEOSIDE_TRIPHOSPHATE_BIOSYNTHETIC_PROCESS                             | 17  | 1.994  | 0.002 | 0.008 |
| GO_LIGASE_ACTIVITY_FORMING_CARBON_NITROGEN_BONDS                                       | 38  | 1.979  | 0.000 | 0.010 |
| GO_CELLULAR_RESPIRATION                                                                | 123 | 1.976  | 0.000 | 0.010 |
| GO_OXIDOREDUCTASE_ACTIVITY_ACTING_ON_NAD_P_H_QUINONE_OR_SIMILAR_COMPOUND_AS_ACCEPTOR   | 46  | 1.961  | 0.000 | 0.010 |
| GO_NUCLEOBASE_BIOSYNTHETIC_PROCESS                                                     | 15  | 1.976  | 0.000 | 0.010 |
| GO_ORGANOPHOSPHATE_CATABOLIC_PROCESS                                                   | 66  | 1.959  | 0.000 | 0.010 |
| GO_FATTY_ACID_CATABOLIC_PROCESS                                                        | 51  | 1.961  | 0.000 | 0.010 |
| GO_NUCLEASE_ACTIVITY                                                                   | 135 | 1.962  | 0.000 | 0.010 |
| GO_OXIDOREDUCTASE_ACTIVITY_ACTING_ON_THE_CH_OH_GROUP_OF_DONORS_NAD_OR_NADP_AS_ACCEPTOR | 63  | 1.964  | 0.000 | 0.010 |
| GO_INTRAMOLECULAR_TRANSFERASE_ACTIVITY                                                 | 23  | 1.965  | 0.000 | 0.010 |
| GO_TRANSLATIONAL_ELONGATION                                                            | 104 | 1.967  | 0.000 | 0.010 |
| GO_NUCLEOTIDE_SUGAR_BIOSYNTHETIC_PROCESS                                               | 18  | 1.969  | 0.000 | 0.010 |
| GO_PYRIMIDINE_CONTAINING_COMPOUND_BIOSYNTHETIC_PROCESS                                 | 32  | 1.953  | 0.000 | 0.010 |
| GO_SKELETAL_MUSCLE_TISSUE_REGENERATION                                                 | 15  | -2.205 | 0.000 | 0.011 |
| GO_DEOXYRIBOSE_PHOSPHATE_CATABOLIC_PROCESS                                             | 20  | 1.945  | 0.000 | 0.011 |
| GO_FATTY_ACID_BETA_OXIDATION                                                           | 37  | 1.939  | 0.000 | 0.012 |
| GO_NUCLEOTIDE_SUGAR_METABOLIC_PROCESS                                                  | 28  | 1.937  | 0.000 | 0.012 |
| GO_PEPTIDE_ANTIGEN_BINDING                                                             | 25  | -2.212 | 0.000 | 0.012 |
| GO_ASPARTATE_FAMILY_AMINO_ACID_BIOSYNTHETIC_PROCESS                                    | 16  | 1.935  | 0.000 | 0.012 |
| GO_NUCLEOSIDE_PHOSPHATE_CATABOLIC_PROCESS                                              | 44  | 1.930  | 0.002 | 0.013 |
| GO_ORGANELLE_ENVELOPE_LUMEN                                                            | 64  | 1.926  | 0.000 | 0.013 |
| GO_MACROMOLECULAR_COMPLEX_DISASSEMBLY                                                  | 152 | 1.911  | 0.000 | 0.015 |
| GO_NUCLEIC_ACID_PHOSPHODIESTER_BOND_HYDROLYSIS                                         | 178 | 1.910  | 0.000 | 0.015 |
| GO_RESPIRATORY_CHAIN                                                                   | 67  | 1.908  | 0.000 | 0.015 |
| GO_CYTOCHROME_COMPLEX_ASSEMBLY                                                         | 16  | 1.911  | 0.002 | 0.015 |
| GO_NADH_DEHYDROGENASE_COMPLEX                                                          | 42  | 1.912  | 0.000 | 0.015 |
| GO_TELOMERE_MAINTENANCE_VIA_RECOMBINATION                                              | 27  | 1.913  | 0.000 | 0.015 |
| GO_PYRIMIDINE_NUCLEOSIDE_TRIPHOSPHATE_METABOLIC_PROCESS                                | 19  | 1.894  | 0.003 | 0.017 |
| GO_OXIDOREDUCTASE_ACTIVITY_ACTING_ON_CH_OH_GROUP_OF_DONORS                             | 72  | 1.892  | 0.000 | 0.017 |
| GO_RIBONUCLEASE_ACTIVITY                                                               | 72  | 1.886  | 0.000 | 0.018 |
| GO_PURINE_CONTAINING_COMPOUND_METABOLIC_PROCESS                                        | 257 | 1.880  | 0.000 | 0.019 |
| GO_RNA_PHOSPHODIESTER_BOND_HYDROLYSIS                                                  | 89  | 1.882  | 0.000 | 0.019 |
| GO_SMALL_MOLECULE_CATABOLIC_PROCESS                                                    | 197 | 1.880  | 0.000 | 0.019 |
| GO_GLYCOSYL_COMPOUND_CATABOLIC_PROCESS                                                 | 29  | 1.875  | 0.003 | 0.020 |
| GO_ENDONUCLEASE_ACTIVITY                                                               | 77  | 1.869  | 0.000 | 0.021 |
| GO_NEGATIVE_CHEMOTAXIS                                                                 | 15  | -2.131 | 0.003 | 0.022 |
| GO_MITOCHONDRIAL_MEMBRANE_PART                                                         | 137 | 1.860  | 0.000 | 0.023 |
| GO_ORGANELLAR_SMALL_RIBOSOMAL_SUBUNIT                                                  | 25  | 1.857  | 0.000 | 0.023 |
| GO_NUCLEOSIDE_MONOPHOSPHATE_METABOLIC_PROCESS                                          | 181 | 1.860  | 0.000 | 0.023 |
| GO_OXIDOREDUCTASE_ACTIVITY_ACTING_ON_THE_CH_CH_GROUP_OF_DONORS                         | 41  | 1.857  | 0.000 | 0.024 |
| GO_OXIDOREDUCTASE_ACTIVITY_ACTING_ON_NAD_P_H                                           | 70  | 1.848  | 0.001 | 0.025 |
| GO_ISOMERASE_ACTIVITY                                                                  | 102 | 1.847  | 0.000 | 0.025 |
| GO_NUCLEOSIDE_PHOSPHATE_BIOSYNTHETIC_PROCESS                                           | 121 | 1.849  | 0.000 | 0.025 |
| GO_PYRIMIDINE_NUCLEOBASE_METABOLIC_PROCESS                                             | 16  | 1.850  | 0.008 | 0.025 |
| GO_COFACTOR_BIOSYNTHETIC_PROCESS                                                       | 123 | 1.848  | 0.000 | 0.025 |
| GO_OXIDATIVE_PHOSPHORYLATION                                                           | 71  | 1.845  | 0.000 | 0.025 |
| GO_MITOTIC_RECOMBINATION                                                               | 29  | 1.840  | 0.000 | 0.025 |
| GO_SEMAPHORIN_PLEXIN_SIGNALING_PATHWAY                                                 | 17  | -2.131 | 0.000 | 0.026 |
| GO_MEMBRANE_LIPID_METABOLIC_PROCESS                                                    | 106 | 1.841  | 0.000 | 0.026 |
| GO_CELLULAR_AMINO_ACID_METABOLIC_PROCESS                                               | 198 | 1.830  | 0.000 | 0.028 |
| GO_CELLULAR_MODIFIED_AMINO_ACID_BIOSYNTHETIC_PROCESS                                   | 33  | 1.823  | 0.002 | 0.030 |
| GO_DOUBLE_STRAND_BREAK_REPAIR                                                          | 110 | 1.824  | 0.000 | 0.030 |
| GO_ENERGY_DERIVATION_BY_OXIDATION_OF_ORGANIC_COMPOUNDS                                 | 168 | 1.819  | 0.000 | 0.031 |
| GO_MHC_PROTEIN_COMPLEX                                                                 | 25  | -2.092 | 0.000 | 0.033 |
| GO_SERINE_FAMILY_AMINO_ACID_METABOLIC_PROCESS                                          | 23  | 1.810  | 0.002 | 0.033 |
| GO_ORGANELLAR_LARGE_RIBOSOMAL_SUBUNIT                                                  | 30  | 1.810  | 0.000 | 0.034 |
| GO_OXIDOREDUCTASE_ACTIVITY_ACTING_ON_THE_CH_CH_GROUP_OF_DONORS_NAD_OR_NADP_AS_ACCEPTOR | 15  | 1.806  | 0.013 | 0.034 |
| GO_SMALL_MOLECULE_BIOSYNTHETIC_PROCESS                                                 | 260 | 1.805  | 0.000 | 0.034 |

|                                                                             |     |        |       |       |
|-----------------------------------------------------------------------------|-----|--------|-------|-------|
| GO_SULFUR_COMPOUND_METABOLIC_PROCESS                                        | 211 | 1.794  | 0.000 | 0.037 |
| GO_DIGESTION                                                                | 41  | -2.070 | 0.000 | 0.037 |
| GO_INTERSTRAND_CROSS_LINK_REPAIR                                            | 31  | 1.797  | 0.000 | 0.037 |
| GO_RESPONSE_TO_INTERFERON_BETA                                              | 18  | 1.794  | 0.007 | 0.038 |
| GO_GLYOXYLATE_METABOLIC_PROCESS                                             | 19  | 1.794  | 0.003 | 0.038 |
| GO_PIGMENT_BIOSYNTHETIC_PROCESS                                             | 33  | 1.790  | 0.002 | 0.038 |
| GO_DNA_DEPENDENT_DNA_REPLICATION                                            | 71  | 1.788  | 0.002 | 0.039 |
| GO_MONOSACCHARIDE_METABOLIC_PROCESS                                         | 118 | 1.785  | 0.000 | 0.040 |
| GO_LIPID_OXIDATION                                                          | 48  | 1.781  | 0.005 | 0.041 |
| GO_OXIDOREDUCTASE_ACTIVITY                                                  | 400 | 1.778  | 0.000 | 0.042 |
| GO_LAMELLIPODIUM_ASSEMBLY                                                   | 19  | 1.778  | 0.005 | 0.042 |
| GO_RNA_PHOSPHODIESTER_BOND_HYDROLYSIS_ENDONUCLEOLYTIC                       | 44  | 1.768  | 0.003 | 0.044 |
| GO_CERAMIDE_BIOSYNTHETIC_PROCESS                                            | 21  | 1.772  | 0.003 | 0.044 |
| GO_SPHINGOLIPID_METABOLIC_PROCESS                                           | 77  | 1.768  | 0.004 | 0.044 |
| GO_ALPHA_AMINO_ACID_METABOLIC_PROCESS                                       | 126 | 1.770  | 0.000 | 0.044 |
| GO_DEOXYRIBONUCLEASE_ACTIVITY                                               | 43  | 1.769  | 0.000 | 0.044 |
| GO_CELLULAR_MODIFIED_AMINO_ACID_METABOLIC_PROCESS                           | 114 | 1.766  | 0.000 | 0.044 |
| GO_ACTIN_FILAMENT_BASED_MOVEMENT                                            | 36  | -2.044 | 0.000 | 0.044 |
| GO_HISTONE_H4_ACETYLATION                                                   | 33  | 1.757  | 0.010 | 0.045 |
| GO_GLYCOSYL_COMPOUND_BIOSYNTHETIC_PROCESS                                   | 91  | 1.759  | 0.000 | 0.045 |
| GO_PURINE_CONTAINING_COMPOUND_BIOSYNTHETIC_PROCESS                          | 89  | 1.758  | 0.000 | 0.045 |
| GO_PHOSPHATIDIC_ACID_METABOLIC_PROCESS                                      | 18  | 1.762  | 0.005 | 0.045 |
| GO_TRNA_MODIFICATION                                                        | 47  | 1.760  | 0.002 | 0.045 |
| GO_PURINE_CONTAINING_COMPOUND_CATABOLIC_PROCESS                             | 33  | 1.759  | 0.003 | 0.045 |
| GO_PIGMENT_METABOLIC_PROCESS                                                | 38  | 1.762  | 0.006 | 0.046 |
| GO_HYDROLASE_ACTIVITY_ACTING_ON_ESTER_BONDS                                 | 422 | 1.760  | 0.000 | 0.046 |
| GO_ELECTRON_TRANSPORT_CHAIN                                                 | 79  | 1.754  | 0.000 | 0.046 |
| GO_NUCLEOSIDE_MONOPHOSPHATE_BIOSYNTHETIC_PROCESS                            | 63  | 1.751  | 0.000 | 0.047 |
| GO_CARBOHYDRATE_BIOSYNTHETIC_PROCESS                                        | 80  | 1.750  | 0.000 | 0.047 |
| GO_GENERATION_OF_PRECURSOR_METABOLITES_AND_ENERGY                           | 216 | 1.744  | 0.000 | 0.050 |
| GO_HEXOSE_METABOLIC_PROCESS                                                 | 103 | 1.740  | 0.000 | 0.051 |
| GO_ORGANOPHOSPHATE_BIOSYNTHETIC_PROCESS                                     | 288 | 1.741  | 0.000 | 0.051 |
| GO_DNA_DIRECTED_RNA_POLYMERASE_III_COMPLEX                                  | 15  | 1.733  | 0.008 | 0.053 |
| GO_ENDODEOXYRIBONUCLEASE_ACTIVITY                                           | 29  | 1.735  | 0.002 | 0.054 |
| GO_CELLULAR_KETONE_METABOLIC_PROCESS                                        | 43  | 1.734  | 0.002 | 0.054 |
| GO_CERAMIDE_METABOLIC_PROCESS                                               | 40  | 1.731  | 0.001 | 0.054 |
| GO_LIGASE_ACTIVITY_FORMING_CARBON_OXYGEN_BONDS                              | 38  | 1.731  | 0.008 | 0.054 |
| GO_EXONUCLEASE_ACTIVITY                                                     | 57  | 1.728  | 0.000 | 0.054 |
| GO_3_5_EXONUCLEASE_ACTIVITY                                                 | 39  | 1.724  | 0.003 | 0.054 |
| GO_COENZYME_BIOSYNTHETIC_PROCESS                                            | 89  | 1.728  | 0.000 | 0.054 |
| GO_TETRAHYDROFOLATE_METABOLIC_PROCESS                                       | 16  | 1.729  | 0.012 | 0.055 |
| GO_FOLIC_ACID_CONTAINING_COMPOUND_METABOLIC_PROCESS                         | 21  | 1.725  | 0.003 | 0.055 |
| GO_ELECTRON_CARRIER_ACTIVITY                                                | 80  | 1.724  | 0.000 | 0.055 |
| GO_ORGANIC_ACID_CATABOLIC_PROCESS                                           | 120 | 1.726  | 0.001 | 0.055 |
| GO_TRANSFERASE_ACTIVITY_TRANSFERRING_ONE_CARBON_GROUPS                      | 136 | 1.722  | 0.000 | 0.056 |
| GO_NUCLEOSIDE_TRIPHOSPHATE_METABOLIC_PROCESS                                | 169 | 1.719  | 0.001 | 0.056 |
| GO_ENDORIBONUCLEASE_ACTIVITY                                                | 38  | 1.714  | 0.003 | 0.058 |
| GO_MONOCARBOXYLIC_ACID_CATABOLIC_PROCESS                                    | 61  | 1.715  | 0.000 | 0.059 |
| GO_CARBOHYDRATE_DERIVATIVE_BIOSYNTHETIC_PROCESS                             | 357 | 1.711  | 0.000 | 0.059 |
| GO_RNA_MODIFICATION                                                         | 81  | 1.709  | 0.001 | 0.060 |
| GO_RIBONUCLEOTIDE_CATABOLIC_PROCESS                                         | 19  | 1.708  | 0.013 | 0.061 |
| GO_LAMELLIPODIUM_ORGANIZATION                                               | 24  | 1.704  | 0.000 | 0.062 |
| GO_MEMBRANE_LIPID_BIOSYNTHETIC_PROCESS                                      | 63  | 1.704  | 0.000 | 0.062 |
| GO_AEROBIC_RESPIRATION                                                      | 48  | 1.701  | 0.009 | 0.063 |
| GO_COFACTOR_BINDING                                                         | 167 | 1.700  | 0.000 | 0.063 |
| GO_CARBOHYDRATE_METABOLIC_PROCESS                                           | 387 | 1.700  | 0.000 | 0.063 |
| GO_SITE_OF_DOUBLE_STRAND_BREAK                                              | 23  | 1.698  | 0.008 | 0.064 |
| GO_TRANSFERASE_ACTIVITY_TRANSFERRING_ALKYL_OR_ARYL_OTHER_THAN_METHYL_GROUPS | 44  | 1.696  | 0.006 | 0.064 |
| GO_GLYCOLIPID_BIOSYNTHETIC_PROCESS                                          | 36  | 1.696  | 0.009 | 0.064 |
| GO_HYDROLASE_ACTIVITY_HYDROLYZING_N_GLYCOSYL_COMPOUNDS                      | 17  | 1.692  | 0.007 | 0.067 |
| GO_CARBON_CARBON_LYASE_ACTIVITY                                             | 35  | 1.689  | 0.005 | 0.067 |
| GO_NUCLEOSIDE_BISPHOSPHATE_METABOLIC_PROCESS                                | 21  | 1.689  | 0.013 | 0.067 |
| GO_CULLIN_RING_UBIQUITIN_LIGASE_COMPLEX                                     | 98  | 1.683  | 0.004 | 0.068 |
| GO_RNA_POLYMERASE_COMPLEX                                                   | 98  | 1.687  | 0.000 | 0.068 |
| GO_MITOCHONDRION_ORGANIZATION                                               | 458 | 1.686  | 0.000 | 0.068 |
| GO_POSITIVE_REGULATION_OF_LIGASE_ACTIVITY                                   | 92  | 1.683  | 0.004 | 0.068 |
| GO_CELLULAR_LIPID_CATABOLIC_PROCESS                                         | 87  | 1.686  | 0.001 | 0.068 |
| GO_HYDROLASE_ACTIVITY_ACTING_ON_GLYCOSYL_BONDS                              | 72  | 1.683  | 0.004 | 0.068 |
| GO_CELLULAR_AMINO_ACID_BIOSYNTHETIC_PROCESS                                 | 53  | 1.685  | 0.011 | 0.068 |
| GO_NUCLEOTIDYLTRANSFERASE_ACTIVITY                                          | 102 | 1.683  | 0.000 | 0.069 |
| GO_DNA_SYNTHESIS_INVOLVED_IN_DNA_REPAIR                                     | 52  | 1.681  | 0.005 | 0.069 |
| GO_NAD_BINDING                                                              | 40  | 1.680  | 0.006 | 0.069 |
| GO_PYRIMIDINE_NUCLEOSIDE_METABOLIC_PROCESS                                  | 37  | 1.679  | 0.006 | 0.069 |
| GO_RNA_POLYMERASE_ACTIVITY                                                  | 40  | 1.676  | 0.009 | 0.070 |
| GO_ONE_CARBON_METABOLIC_PROCESS                                             | 22  | 1.676  | 0.013 | 0.071 |
| GO_POSITIVE_REGULATION_OF_PHOSPHATASE_ACTIVITY                              | 18  | 1.673  | 0.018 | 0.071 |
| GO_TRANSCRIPTION_FROM_RNA_POLYMERASE_III_PROMOTER                           | 35  | 1.672  | 0.009 | 0.072 |

|                                                                                                             |     |        |       |       |
|-------------------------------------------------------------------------------------------------------------|-----|--------|-------|-------|
| GO_METAL_CLUSTER_BINDING                                                                                    | 53  | 1.665  | 0.006 | 0.076 |
| GO_ALPHA_AMINO_ACID_BIOSYNTHETIC_PROCESS                                                                    | 49  | 1.660  | 0.005 | 0.079 |
| GO_NCRNA_METABOLIC_PROCESS                                                                                  | 420 | 1.659  | 0.000 | 0.080 |
| GO_CUL3_RING_UBIQUITIN_LIGASE_COMPLEX                                                                       | 39  | 1.658  | 0.008 | 0.080 |
| GO_CELLULAR_METABOLIC_COMPOUND_SALVAGE                                                                      | 27  | 1.656  | 0.011 | 0.080 |
| GO_OXIDOREDUCTION_COENZYME_METABOLIC_PROCESS                                                                | 78  | 1.654  | 0.001 | 0.082 |
| GO_ORGANIC_ACID_BIOSYNTHETIC_PROCESS                                                                        | 140 | 1.652  | 0.001 | 0.082 |
| GO_DNA_REPLICATION                                                                                          | 144 | 1.651  | 0.001 | 0.083 |
| GO_DIGESTIVE_SYSTEM_PROCESS                                                                                 | 28  | -1.976 | 0.000 | 0.086 |
| GO_GLUCOSE_6_PHOSPHATE_METABOLIC_PROCESS                                                                    | 15  | 1.640  | 0.017 | 0.090 |
| GO_MICROBODY_PART                                                                                           | 61  | 1.640  | 0.008 | 0.090 |
| GO_KETONE_BIOSYNTHETIC_PROCESS                                                                              | 18  | 1.641  | 0.024 | 0.091 |
| GO_LIGASE_ACTIVITY                                                                                          | 280 | 1.637  | 0.000 | 0.091 |
| GO_THIOESTER_METABOLIC_PROCESS                                                                              | 54  | 1.637  | 0.005 | 0.091 |
| GO_RNA_PHOSPHODIESTER_BOND_HYDROLYSIS_EXONUCLEOLYTIC                                                        | 29  | 1.638  | 0.011 | 0.091 |
| GO_AMINO_ACID_ACTIVATION                                                                                    | 41  | 1.636  | 0.008 | 0.091 |
| GO_COENZYME_BINDING                                                                                         | 121 | 1.635  | 0.000 | 0.092 |
| GO_POSTREPLICATION_REPAIR                                                                                   | 46  | 1.633  | 0.006 | 0.092 |
| GO_HEME_METABOLIC_PROCESS                                                                                   | 22  | 1.632  | 0.026 | 0.093 |
| GO_THIOLESTER_HYDROLASE_ACTIVITY                                                                            | 21  | 1.632  | 0.011 | 0.093 |
| GO_MAGNESIUM_ION_BINDING                                                                                    | 135 | 1.630  | 0.003 | 0.093 |
| GO_ACETYLGUCOSAMINYLTRANSFERASE_ACTIVITY                                                                    | 29  | 1.626  | 0.019 | 0.096 |
| GO_EXONUCLEASE_ACTIVITY_ACTIVE_WITH_EITHER_RIBO_OR_DEOXYRIBONUCLEIC_ACIDS_AND_PRODUCING_5_PHOSPHOMONOESTERS | 38  | 1.623  | 0.009 | 0.098 |
| GO_CARBOHYDRATE_DERIVATIVE_CATABOLIC_PROCESS                                                                | 107 | 1.622  | 0.001 | 0.099 |
| GO_DETECTION_OF_BIOTIC_STIMULUS                                                                             | 16  | -1.953 | 0.000 | 0.099 |
| GO_HEME_BIOSYNTHETIC_PROCESS                                                                                | 18  | 1.621  | 0.029 | 0.099 |
| GO_MITOCHONDRIAL_TRANSMEMBRANE_TRANSPORT                                                                    | 49  | 1.619  | 0.019 | 0.100 |
| GO_AMIDE_BIOSYNTHETIC_PROCESS                                                                               | 407 | 1.617  | 0.000 | 0.101 |
| GO_PTERIDINE_CONTAINING_COMPOUND_METABOLIC_PROCESS                                                          | 26  | 1.612  | 0.019 | 0.102 |
| GO_GLUCAN_BIOSYNTHETIC_PROCESS                                                                              | 17  | 1.613  | 0.019 | 0.103 |
| GO_SPECIFICATION_OF_SYMMETRY                                                                                | 45  | 1.613  | 0.006 | 0.103 |
| GO_PORPHYRIN_CONTAINING_COMPOUND_METABOLIC_PROCESS                                                          | 26  | 1.615  | 0.018 | 0.103 |
| GO_EMBRYONIC_HEART_TUBE_DEVELOPMENT                                                                         | 31  | 1.615  | 0.012 | 0.103 |
| GO_POLYSACCHARIDE_BIOSYNTHETIC_PROCESS                                                                      | 27  | 1.614  | 0.026 | 0.103 |
| GO_METHYLATION                                                                                              | 173 | 1.609  | 0.001 | 0.105 |
| GO_SULFUR_COMPOUND_BIOSYNTHETIC_PROCESS                                                                     | 121 | 1.607  | 0.000 | 0.106 |
| GO_PYRIMIDINE_CONTAINING_COMPOUND_CATABOLIC_PROCESS                                                         | 24  | 1.603  | 0.013 | 0.109 |
| GO_GLUCOSE_METABOLIC_PROCESS                                                                                | 78  | 1.603  | 0.004 | 0.109 |
| GO_REGULATION_OF_DNA_DEPENDENT_DNA_REPLICATION                                                              | 29  | 1.603  | 0.019 | 0.109 |
| GO_ANAPHASE_PROMOTING_COMPLEX_DEPENDENT_CATABOLIC_PROCESS                                                   | 66  | 1.600  | 0.009 | 0.111 |
| GO_ERROR_FREE_TRANSLESION_SYNTHESIS                                                                         | 17  | 1.599  | 0.025 | 0.111 |
| GO_DNA_STRAND_ELONGATION                                                                                    | 24  | 1.598  | 0.018 | 0.111 |
| GO_EMBRYONIC_HEART_TUBE_MORPHOGENESIS                                                                       | 25  | 1.600  | 0.021 | 0.111 |
| GO_DNA_STRAND_ELONGATION_INVOLVED_IN_DNA_REPLICATION                                                        | 19  | 1.597  | 0.022 | 0.111 |
| GO_MONOCARBOXYLIC_ACID_METABOLIC_PROCESS                                                                    | 275 | 1.593  | 0.001 | 0.114 |
| GO_PYRIMIDINE_RIBONUCLEOTIDE_METABOLIC_PROCESS                                                              | 20  | 1.593  | 0.012 | 0.114 |
| GO_ALDITOL_PHOSPHATE_METABOLIC_PROCESS                                                                      | 15  | 1.589  | 0.031 | 0.117 |
| GO_FATTY_ACYL_COA_BINDING                                                                                   | 24  | 1.589  | 0.028 | 0.117 |
| GO_PYRIMIDINE_NUCLEOSIDE_BIOSYNTHETIC_PROCESS                                                               | 25  | 1.590  | 0.023 | 0.117 |
| GO_4_IRON_4_SULFUR_CLUSTER_BINDING                                                                          | 36  | 1.587  | 0.020 | 0.117 |
| GO_BRANCHED_CHAIN_AMINO_ACID_METABOLIC_PROCESS                                                              | 21  | 1.581  | 0.033 | 0.123 |
| GO_REGULATION_OF_LIGASE_ACTIVITY                                                                            | 108 | 1.580  | 0.006 | 0.124 |
| GO_MICROBODY_MEMBRANE                                                                                       | 42  | 1.579  | 0.016 | 0.124 |
| GO_NUCLEAR_TRANSCRIBED_MRNA_CATABOLIC_PROCESS_EXONUCLEOLYTIC                                                | 29  | 1.576  | 0.020 | 0.125 |
| GO_RIBONUCLEOSIDE_CATABOLIC_PROCESS                                                                         | 18  | 1.577  | 0.025 | 0.126 |
| GO_GPI_ANCHOR_METABOLIC_PROCESS                                                                             | 24  | 1.575  | 0.026 | 0.127 |
| GO_RIBOSOME                                                                                                 | 202 | 1.571  | 0.000 | 0.130 |
| GO_PYRUVATE_METABOLIC_PROCESS                                                                               | 43  | 1.569  | 0.016 | 0.131 |
| GO_PROTEIN_POLYUBIQUITINATION                                                                               | 209 | 1.569  | 0.000 | 0.131 |
| GO_CARBOXY_LYASE_ACTIVITY                                                                                   | 24  | 1.566  | 0.028 | 0.132 |
| GO_PTERIDINE_CONTAINING_COMPOUND_BIOSYNTHETIC_PROCESS                                                       | 15  | 1.567  | 0.034 | 0.133 |
| GO_CELLULAR_AMINO_ACID_CATABOLIC_PROCESS                                                                    | 61  | 1.566  | 0.012 | 0.133 |
| GO_THREONINE_TYPE_PEPTIDASE_ACTIVITY                                                                        | 18  | 1.565  | 0.028 | 0.133 |
| GO_PROTEIN_DISULFIDE_OXIDOREDUCTASE_ACTIVITY                                                                | 18  | 1.561  | 0.044 | 0.136 |
| GO_OXIDOREDUCTASE_ACTIVITY_ACTING_ON_A_SULFUR_GROUP_OF_DONORS                                               | 36  | 1.559  | 0.009 | 0.136 |
| GO_NUCLEOSIDE_TRIPHOSPHATE_BIOSYNTHETIC_PROCESS                                                             | 47  | 1.560  | 0.020 | 0.136 |
| GO_CELLULAR_CARBOHYDRATE_BIOSYNTHETIC_PROCESS                                                               | 33  | 1.559  | 0.022 | 0.136 |
| GO_NCRNA_PROCESSING                                                                                         | 315 | 1.561  | 0.000 | 0.136 |
| GO_STRUCTURAL_CONSTITUENT_OF_RIBOSOME                                                                       | 188 | 1.556  | 0.001 | 0.138 |
| GO_FATTY_ACID_BETA_OXIDATION_USING_ACYL_COA_DEHYDROGENASE                                                   | 15  | 1.555  | 0.028 | 0.138 |
| GO_PROTEIN_N_LINKED_GLYCOSYLATION                                                                           | 55  | 1.555  | 0.011 | 0.138 |
| GO_PROTEIN_AUTOUBIQUITINATION                                                                               | 36  | 1.556  | 0.016 | 0.139 |
| GO_EXOPEPTIDASE_ACTIVITY                                                                                    | 56  | 1.556  | 0.015 | 0.139 |
| GO_CHROMOSOMAL_REGION                                                                                       | 233 | 1.553  | 0.001 | 0.139 |
| GO_MONOSACCHARIDE_BIOSYNTHETIC_PROCESS                                                                      | 40  | 1.552  | 0.015 | 0.140 |
| GO_OLIGOSACCHARIDE_METABOLIC_PROCESS                                                                        | 42  | 1.548  | 0.021 | 0.143 |



|                                                                                                   |     |        |       |       |
|---------------------------------------------------------------------------------------------------|-----|--------|-------|-------|
| GO_CARBOHYDRATE_CATABOLIC_PROCESS                                                                 | 75  | 1.549  | 0.011 | 0.143 |
| GO_DNA_CATABOLIC_PROCESS                                                                          | 19  | 1.547  | 0.028 | 0.143 |
| GO_PHOSPHATIDYLOSITOL_3_KINASE_BINDING                                                            | 20  | 1.547  | 0.049 | 0.144 |
| GO_REPLISOME                                                                                      | 27  | 1.546  | 0.031 | 0.144 |
| GO_DICARBOXYLIC_ACID_TRANSMEMBRANE_TRANSPORTER_ACTIVITY                                           | 15  | 1.543  | 0.045 | 0.147 |
| GO_ACETYLTTRANSFERASE_COMPLEX                                                                     | 65  | 1.541  | 0.018 | 0.147 |
| GO_RNA_METHYLTRANSFERASE_ACTIVITY                                                                 | 27  | 1.541  | 0.030 | 0.147 |
| GO_FATTY_ACID_METABOLIC_PROCESS                                                                   | 176 | 1.542  | 0.001 | 0.148 |
| GO_ERROR_PRONE_TRANSLESION_SYNTHESIS                                                              | 17  | 1.538  | 0.036 | 0.150 |
| GO_NEURAL_CRESCENT_CELL_MIGRATION                                                                 | 18  | -1.867 | 0.003 | 0.150 |
| GO_PURINE_NUCLEOSIDE_BIOSYNTHETIC_PROCESS                                                         | 67  | 1.537  | 0.013 | 0.150 |
| GO_CELLULAR_CARBOHYDRATE_METABOLIC_PROCESS                                                        | 90  | 1.536  | 0.017 | 0.152 |
| GO_ACID_SECRETION                                                                                 | 25  | -1.884 | 0.000 | 0.152 |
| GO_HISTONE_MRNA_METABOLIC_PROCESS                                                                 | 23  | 1.533  | 0.033 | 0.154 |
| GO_PROTEINACEOUS_EXTRACELLULAR_MATRIX                                                             | 103 | -1.869 | 0.000 | 0.155 |
| GO_SENSORY_PERCEPTION_OF_CHEMICAL_STIMULUS                                                        | 42  | -1.855 | 0.003 | 0.156 |
| GO_UBIQUITIN_LIGASE_COMPLEX                                                                       | 193 | 1.528  | 0.000 | 0.159 |
| GO_MICROBODY                                                                                      | 93  | 1.528  | 0.011 | 0.159 |
| GO_REGULATION_OF_VASOCONSTRICTION                                                                 | 21  | -1.886 | 0.000 | 0.159 |
| GO_DISULFIDE_OXIDOREDUCTASE_ACTIVITY                                                              | 22  | 1.527  | 0.031 | 0.160 |
| GO_NEGATIVE_REGULATION_OF_VIRAL_GENOME_REPLICATION                                                | 38  | 1.527  | 0.029 | 0.160 |
| GO_MITOCHONDRIAL_ATP_SYNTHESIS_COUPLED_PROTON_TRANSPORT                                           | 17  | 1.525  | 0.030 | 0.160 |
| GO_POSITIVE_REGULATION_OF_OSTEOBLAST_DIFFERENTIATION                                              | 25  | -1.870 | 0.000 | 0.163 |
| GO_ACTIN_MEDIATED_CELL_CONTRACTION                                                                | 22  | -1.844 | 0.008 | 0.164 |
| GO_POSITIVE_REGULATION_OF_OSSIFICATION                                                            | 35  | -1.888 | 0.003 | 0.167 |
| GO_TRANSCRIPTIONALLY_ACTIVE_CHROMATIN                                                             | 15  | 1.519  | 0.059 | 0.167 |
| GO_TRANSCRIPTION_ELONGATION_FACTOR_COMPLEX                                                        | 37  | 1.518  | 0.029 | 0.168 |
| GO_LIGASE_ACTIVITY_FORMING_CARBON_SULFUR_BONDS                                                    | 25  | 1.516  | 0.040 | 0.169 |
| GO_VACUOLE_FUSION                                                                                 | 17  | 1.516  | 0.058 | 0.170 |
| GO_NADP_BINDING                                                                                   | 25  | 1.516  | 0.030 | 0.170 |
| GO_PEPTIDE_METABOLIC_PROCESS                                                                      | 435 | 1.513  | 0.000 | 0.172 |
| GO_DNA_BIOSYNTHETIC_PROCESS                                                                       | 82  | 1.512  | 0.012 | 0.173 |
| GO_PRIMARY_ALCOHOL_METABOLIC_PROCESS                                                              | 21  | 1.511  | 0.031 | 0.173 |
| GO_REGULATION_OF_PROTEIN_UBIQUITINATION_INVOLVED_IN_UBIQUITIN_DEPENDENT_PROTEIN_CATABOLIC_PROCESS | 85  | 1.511  | 0.019 | 0.173 |
| GO_NUCLEOTIDE_EXCISION_REPAIR_DNA_INCISION                                                        | 34  | 1.510  | 0.027 | 0.174 |
| GO_POSITIVE_REGULATION_OF_DEPHOSPHORYLATION                                                       | 32  | 1.506  | 0.035 | 0.178 |
| GO_TRANSFERASE_ACTIVITY_TRANSFERRING_GLYCOSYL_GROUPS                                              | 152 | 1.504  | 0.005 | 0.180 |
| GO_PROTEIN_TRIMERIZATION                                                                          | 25  | 1.503  | 0.054 | 0.181 |
| GO_POSITIVE_REGULATION_OF_MICROTUBULE_POLYMERIZATION_OR_DEPOLYMERIZATION                          | 15  | 1.502  | 0.054 | 0.181 |
| GO_TRANS_GOLGI_NETWORK_TRANSPORT_VESICLE                                                          | 19  | 1.501  | 0.044 | 0.181 |
| GO_NUCLEOBASE_CONTAINING_SMALL_MOLECULE_INTERCONVERSION                                           | 15  | 1.503  | 0.047 | 0.181 |
| GO_REGULATION_OF_MUSCLE_CONTRACTION                                                               | 59  | -1.785 | 0.000 | 0.185 |
| GO_PHOSPHOLIPID_BIOSYNTHETIC_PROCESS                                                              | 149 | 1.498  | 0.005 | 0.186 |
| GO_TRANSFERASE_COMPLEX_TRANSFERRING_PHOSPHORUS_CONTAINING_GROUPS                                  | 181 | 1.496  | 0.001 | 0.187 |
| GO_NEGATIVE_REGULATION_OF_LEUKOCYTE_DIFFERENTIATION                                               | 50  | -1.823 | 0.000 | 0.189 |
| GO_REGULATION_OF_VIRAL_GENOME_REPLICATION                                                         | 60  | 1.494  | 0.015 | 0.190 |
| GO_REGULATION_OF_TRANSCRIPTION_FROM_RNA_POLYMERASE_I_PROMOTER                                     | 19  | -1.786 | 0.000 | 0.190 |
| GO_NUCLEOTIDE_PHOSPHORYLATION                                                                     | 43  | 1.490  | 0.038 | 0.193 |
| GO_CARBOXYLIC_ESTER_HYDROLASE_ACTIVITY                                                            | 62  | 1.490  | 0.025 | 0.193 |
| GO_PROTEIN_UBIQUITINATION                                                                         | 449 | 1.491  | 0.000 | 0.193 |
| GO_TISSUE_REGENERATION                                                                            | 27  | -1.788 | 0.008 | 0.194 |
| GO_PEPTIDYL_ASPARAGINE_MODIFICATION                                                               | 29  | 1.489  | 0.047 | 0.194 |
| GO_REPLICATION_FORK                                                                               | 51  | 1.486  | 0.026 | 0.197 |
| GO_NUCLEOTIDE_EXCISION_REPAIR_DNA_GAP_FILLING                                                     | 22  | 1.486  | 0.060 | 0.197 |
| GO_ACYLGLYCEROL_O_ACYLTRANSFERASE_ACTIVITY                                                        | 16  | 1.484  | 0.050 | 0.198 |
| GO_PROTON_TRANSPORTING_TWO_SECTOR_ATPASE_COMPLEX                                                  | 38  | 1.481  | 0.040 | 0.198 |
| GO_BASE_EXCISION_REPAIR                                                                           | 35  | 1.484  | 0.053 | 0.199 |
| GO_CHROMOSOME_TELOMERIC_REGION                                                                    | 124 | 1.483  | 0.010 | 0.199 |
| GO_LIPID_BIOSYNTHETIC_PROCESS                                                                     | 305 | 1.482  | 0.000 | 0.199 |
| GO_PRERIBOSOME                                                                                    | 47  | 1.481  | 0.029 | 0.199 |
| GO_TRNA_BINDING                                                                                   | 32  | 1.482  | 0.039 | 0.199 |
| GO_DNA_HELICASE_ACTIVITY                                                                          | 42  | 1.483  | 0.043 | 0.199 |
| GO_LYSINE_ACETYLATED_HISTONE_BINDING                                                              | 16  | -1.788 | 0.013 | 0.200 |
| GO_POSITIVE_REGULATION_OF_SODIUM_ION_TRANSPORT                                                    | 17  | 1.479  | 0.046 | 0.200 |
| GO_REGULATION_OF_POSTTRANSCRIPTIONAL_GENE_SILENCING                                               | 17  | -1.730 | 0.012 | 0.202 |
| GO_REGULATION_OF_INSULIN_RECEPTOR_SIGNALING_PATHWAY                                               | 24  | -1.721 | 0.018 | 0.202 |
| GO_INOSITOL_LIPID_MEDIATED_SIGNALING                                                              | 63  | -1.709 | 0.000 | 0.202 |
| GO_MYOSIN_COMPLEX                                                                                 | 26  | -1.724 | 0.013 | 0.202 |
| GO_PEPTIDE_CROSS_LINKING                                                                          | 15  | -1.710 | 0.008 | 0.203 |
| GO_NEGATIVE_REGULATION_OF_FAT_CELL_DIFFERENTIATION                                                | 25  | -1.717 | 0.006 | 0.204 |
| GO_REGULATION_OF_ERK1_AND_ERK2_CASCADE                                                            | 111 | -1.712 | 0.000 | 0.204 |
| GO_LENS_DEVELOPMENT_IN_CAMERA_TYPE_EYE                                                            | 31  | -1.736 | 0.006 | 0.205 |
| GO_RIBOSOME_BINDING                                                                               | 33  | -1.693 | 0.006 | 0.205 |
| GO_STEROL_BINDING                                                                                 | 21  | -1.691 | 0.011 | 0.205 |
| GO_REGULATION_OF_ASTROCYTE_DIFFERENTIATION                                                        | 15  | -1.730 | 0.013 | 0.205 |
| GO_REGULATION_OF_FAT_CELL_DIFFERENTIATION                                                         | 52  | -1.704 | 0.003 | 0.205 |

|                                                                                                              |     |        |       |       |
|--------------------------------------------------------------------------------------------------------------|-----|--------|-------|-------|
| GO_REGULATION_OF_AXON_GUIDANCE                                                                               | 17  | -1.702 | 0.023 | 0.205 |
| GO_MUSCLE_CELL_DEVELOPMENT                                                                                   | 49  | -1.695 | 0.006 | 0.205 |
| GO_MESONEPHROS_DEVELOPMENT                                                                                   | 34  | -1.789 | 0.011 | 0.206 |
| GO_ACTIN_MYOSIN_FILAMENT_SLIDING                                                                             | 15  | -1.725 | 0.016 | 0.206 |
| GO_REGULATION_OF_SUBSTRATE_ADHESION_DEPENDENT_CELL_SPREADING                                                 | 28  | -1.742 | 0.008 | 0.206 |
| GO_POTASSIUM_CHANNEL_ACTIVITY                                                                                | 28  | -1.714 | 0.006 | 0.206 |
| GO_REGULATION_OF_MUSCLE_SYSTEM_PROCESS                                                                       | 89  | -1.739 | 0.000 | 0.207 |
| GO_NEGATIVE_REGULATION_OF_GENE_SILENCING                                                                     | 15  | -1.687 | 0.016 | 0.207 |
| GO_BONE_MINERALIZATION                                                                                       | 15  | -1.696 | 0.020 | 0.207 |
| GO_NUCLEAR_REPLICATION_FORK                                                                                  | 33  | 1.474  | 0.035 | 0.208 |
| GO_SIGNALING_RECEPTOR_ACTIVITY                                                                               | 363 | -1.731 | 0.000 | 0.208 |
| GO_POSITIVE_REGULATION_OF_EPITHELIAL_CELL_DIFFERENTIATION                                                    | 22  | -1.750 | 0.005 | 0.208 |
| GO_WW_DOMAIN_BINDING                                                                                         | 16  | 1.473  | 0.070 | 0.208 |
| GO_STRIATED_MUSCLE_CONTRACTION                                                                               | 44  | -1.697 | 0.003 | 0.209 |
| GO_EXTRACELLULAR_MATRIX                                                                                      | 129 | -1.764 | 0.000 | 0.209 |
| GO_NEGATIVE_REGULATION_OF_INTERFERON_GAMMA_PRODUCTION                                                        | 19  | -1.747 | 0.010 | 0.210 |
| GO_REGULATION_OF_CELL_JUNCTION_ASSEMBLY                                                                      | 39  | -1.760 | 0.006 | 0.210 |
| GO_PROTON_TRANSPORTING_ATP_SYNTHASE_COMPLEX                                                                  | 20  | 1.471  | 0.030 | 0.210 |
| GO_G_PROTEIN_COUPLED_RECEPTOR_ACTIVITY                                                                       | 132 | -1.743 | 0.000 | 0.211 |
| GO_LUMENAL_SIDE_OF_MEMBRANE                                                                                  | 30  | -1.806 | 0.008 | 0.211 |
| GO_RESPONSE_TO_CAMP                                                                                          | 57  | -1.800 | 0.000 | 0.211 |
| GO_ANTIGEN_BINDING                                                                                           | 59  | -1.766 | 0.003 | 0.212 |
| GO_NON_RECOMBINATIONAL_REPAIR                                                                                | 55  | 1.469  | 0.023 | 0.213 |
| GO_REGULATION_OF_RESPONSE_TO_INTERFERON_GAMMA                                                                | 19  | 1.469  | 0.062 | 0.213 |
| GO_STEROID_BINDING                                                                                           | 34  | -1.789 | 0.006 | 0.213 |
| GO_REGULATION_OF_BLOOD_VESSEL_ENDOTHELIAL_CELL_MIGRATION                                                     | 30  | -1.751 | 0.011 | 0.213 |
| GO_NEGATIVE_REGULATION_OF_LYMPHOCYTE_DIFFERENTIATION                                                         | 21  | -1.754 | 0.013 | 0.213 |
| GO_NEGATIVE_REGULATION_OF_CELL_ACTIVATION                                                                    | 93  | -1.675 | 0.000 | 0.214 |
| GO_NEGATIVE_REGULATION_OF_CELL_MORPHOGENESIS_INVOLVED_IN_DIFFERENTIATION                                     | 53  | -1.676 | 0.009 | 0.216 |
| GO_VITAMIN_METABOLIC_PROCESS                                                                                 | 69  | 1.466  | 0.019 | 0.216 |
| GO_PURINE_NUCLEOSIDE_MONOPHOSPHATE_BIOSYNTHETIC_PROCESS                                                      | 47  | 1.466  | 0.027 | 0.216 |
| GO_REGULATION_OF_NITRIC_OXIDE_BIOSYNTHETIC_PROCESS                                                           | 32  | -1.677 | 0.013 | 0.217 |
| GO_DNA_REPAIR                                                                                                | 356 | 1.464  | 0.001 | 0.218 |
| GO_SMALL_RIBOSOMAL_SUBUNIT                                                                                   | 64  | 1.463  | 0.036 | 0.218 |
| GO_DNA_TEMPLATED_TRANSCRIPTION_TERMINATION                                                                   | 79  | 1.462  | 0.017 | 0.219 |
| GO_CHAPERONE_MEDIATED_PROTEIN_FOLDING                                                                        | 35  | 1.461  | 0.049 | 0.220 |
| GO_POSITIVE_REGULATION_OF_NOTCH_SIGNALING_PATHWAY                                                            | 22  | 1.461  | 0.073 | 0.220 |
| GO_TETRAPYRROLE_BIOSYNTHETIC_PROCESS                                                                         | 23  | 1.460  | 0.056 | 0.221 |
| GO_REGULATION_OF_LIPID_STORAGE                                                                               | 24  | -1.789 | 0.000 | 0.222 |
| GO_HYDROLASE_ACTIVITY_HYDROLYZING_O_GLYCOSYL_COMPOUNDS                                                       | 53  | 1.459  | 0.037 | 0.222 |
| GO_SPHINGOLIPID_BIOSYNTHETIC_PROCESS                                                                         | 38  | 1.458  | 0.040 | 0.222 |
| GO_PYRIMIDINE_RIBONUCLEOSIDE_METABOLIC_PROCESS                                                               | 26  | 1.457  | 0.058 | 0.223 |
| GO_POTASSIUM_CHANNEL_COMPLEX                                                                                 | 25  | -1.667 | 0.011 | 0.225 |
| GO_RNA_POLYMERASE_BINDING                                                                                    | 30  | 1.452  | 0.058 | 0.229 |
| GO_MYELOID_DENDRITIC_CELL_ACTIVATION                                                                         | 17  | -1.662 | 0.024 | 0.230 |
| GO_NEGATIVE_REGULATION_OF_T_CELL_DIFFERENTIATION                                                             | 18  | -1.649 | 0.031 | 0.234 |
| GO_RIBONUCLEOSIDE_TRIPHOSPHATE_BIOSYNTHETIC_PROCESS                                                          | 39  | 1.449  | 0.045 | 0.235 |
| GO_LYMPHOCYTE_COSTIMULATION                                                                                  | 53  | -1.651 | 0.000 | 0.235 |
| GO_THIOESTER_BIOSYNTHETIC_PROCESS                                                                            | 37  | 1.448  | 0.046 | 0.236 |
| GO_ORGANONITROGEN_COMPOUND_CATABOLIC_PROCESS                                                                 | 194 | 1.447  | 0.008 | 0.236 |
| GO_TRANSLESION_SYNTHESIS                                                                                     | 34  | 1.446  | 0.059 | 0.236 |
| GO_TRANSFERASE_ACTIVITY_TRANSFERRING_HEXOSYL_GROUPS                                                          | 104 | 1.447  | 0.024 | 0.236 |
| GO_SAGA_TYPE_COMPLEX                                                                                         | 23  | 1.444  | 0.065 | 0.237 |
| GO_NUCLEAR_UBIQUITIN_LIGASE_COMPLEX                                                                          | 33  | 1.444  | 0.072 | 0.238 |
| GO_AMEBOIDAL_TYPE_CELL_MIGRATION                                                                             | 74  | -1.651 | 0.000 | 0.238 |
| GO_OXIDOREDUCTASE_ACTIVITY_ACTING_ON_PEROXIDE_AS_ACCEPTOR                                                    | 23  | 1.445  | 0.064 | 0.238 |
| GO_CELLULAR_PROTEIN_COMPLEX_ASSEMBLY                                                                         | 228 | 1.443  | 0.015 | 0.239 |
| GO_POSITIVE_REGULATION_OF_SUBSTRATE_ADHESION_DEPENDENT_CELL_SPREADING                                        | 20  | -1.643 | 0.019 | 0.239 |
| GO_INFLAMMATORY_RESPONSE_TO_ANTIGENIC_STIMULUS                                                               | 18  | -1.652 | 0.010 | 0.241 |
| GO_ACTOMYOSIN_STRUCTURE_ORGANIZATION                                                                         | 33  | -1.643 | 0.005 | 0.242 |
| GO_DNA_DEPENDENT_DNA_REPLICATION_MAINTENANCE_OF_FIDELITY                                                     | 20  | 1.440  | 0.070 | 0.243 |
| GO_NEGATIVE_REGULATION_OF_CHEMOTAXIS                                                                         | 20  | -1.652 | 0.018 | 0.243 |
| GO_CARDIAC_CELL_DEVELOPMENT                                                                                  | 17  | -1.637 | 0.023 | 0.246 |
| GO TRABECULA MORPHOGENESIS                                                                                   | 22  | -1.633 | 0.013 | 0.247 |
| GO PEPTIDE TRANSPORT                                                                                         | 34  | -1.634 | 0.014 | 0.247 |
| GO MONOSACCHARIDE BINDING                                                                                    | 43  | 1.437  | 0.043 | 0.248 |
| GO_UBIQUITIN LIKE PROTEIN TRANSFERASE ACTIVITY                                                               | 307 | 1.434  | 0.002 | 0.249 |
| GO_CELLULAR CARBOHYDRATE CATABOLIC PROCESS                                                                   | 22  | 1.434  | 0.076 | 0.249 |
| GO_LIPID CATABOLIC PROCESS                                                                                   | 122 | 1.434  | 0.023 | 0.249 |
| GO_ENDONUCLEASE_ACTIVITY_ACTIVE_WITH_EITHER_RIBO_OR_DEOXYRIBONUCLEIC_ACIDS_AND_PRODUCING_5_PHOSPHOMONOESTERS | 25  | 1.435  | 0.059 | 0.249 |
| GO_INTRINSIC_COMPONENT_OF_MITOCHONDRIAL_MEMBRANE                                                             | 39  | 1.435  | 0.056 | 0.250 |

### HCC vs LC

| NAME                                            | SIZE | NES    | NOM p-val | FDR q-val |
|-------------------------------------------------|------|--------|-----------|-----------|
| GO_INNER_MITOCHONDRIAL_MEMBRANE_PROTEIN_COMPLEX | 90   | -2.187 | 0.000     | 0.000     |

|                                                                                      |     |        |       |       |
|--------------------------------------------------------------------------------------|-----|--------|-------|-------|
| GO_PURINE_NUCLEOSIDE_MONOPHOSPHATE_BIOSYNTHETIC_PROCESS                              | 47  | -2.118 | 0.000 | 0.001 |
| GO_CYTOSOLIC_RIBOSOME                                                                | 98  | -2.089 | 0.000 | 0.002 |
| GO_MITOCHONDRIAL_MEMBRANE_PART                                                       | 137 | -2.014 | 0.000 | 0.005 |
| GO_MITOCHONDRIAL_PROTEIN_COMPLEX                                                     | 115 | -2.039 | 0.000 | 0.005 |
| GO_TRANSLATIONAL_INITIATION                                                          | 136 | -2.007 | 0.000 | 0.005 |
| GO_NUCLEOSIDE_MONOPHOSPHATE_BIOSYNTHETIC_PROCESS                                     | 63  | -2.021 | 0.000 | 0.005 |
| GO_PROTEIN_LOCALIZATION_TO_ENDOPLASMIC_RETICULUM                                     | 113 | -1.974 | 0.000 | 0.007 |
| GO_OXIDOREDUCTASE_ACTIVITY_ACTING_ON_PEROXIDE_AS_ACCEPTOR                            | 23  | -1.960 | 0.000 | 0.008 |
| GO_RIBONUCLEOSIDE_TRIPHOSPHATE_BIOSYNTHETIC_PROCESS                                  | 39  | -1.988 | 0.000 | 0.008 |
| GO_OLIGODENDROCYTE_DIFFERENTIATION                                                   | 24  | -1.963 | 0.000 | 0.008 |
| GO_ESTABLISHMENT_OF_PROTEIN_LOCALIZATION_TO_ENDOPLASMIC_RETICULUM                    | 99  | -1.970 | 0.000 | 0.008 |
| GO_NUCLEOSIDE_TRIPHOSPHATE_BIOSYNTHETIC_PROCESS                                      | 47  | -1.976 | 0.000 | 0.008 |
| GO_NADH_DEHYDROGENASE_COMPLEX                                                        | 42  | -1.966 | 0.000 | 0.008 |
| GO_CYTOSOLIC_LARGE_RIBOSOMAL_SUBUNIT                                                 | 55  | -1.977 | 0.000 | 0.009 |
| GO_ATP_BIOSYNTHETIC_PROCESS                                                          | 26  | -1.948 | 0.000 | 0.009 |
| GO_ELECTRON_TRANSPORT_CHAIN                                                          | 79  | -1.941 | 0.000 | 0.009 |
| GO_PROTON_TRANSPORTING_TWO_SECTOR_ATPASE_COMPLEX_PROTON_TRANSPORTING_DOMAIN          | 17  | -1.939 | 0.000 | 0.009 |
| GO_MITOCHONDRIAL_RESPIRATORY_CHAIN_COMPLEX_ASSEMBLY                                  | 62  | -1.928 | 0.000 | 0.011 |
| GO_MITOCHONDRIAL_RESPIRATORY_CHAIN_COMPLEX_I_BIOGENESIS                              | 48  | -1.905 | 0.000 | 0.015 |
| GO_PROTEIN_TARGETING_TO_MEMBRANE                                                     | 132 | -1.908 | 0.000 | 0.015 |
| GO_MITOCHONDRIAL_ATP_SYNTHESIS_COUPLED_PROTON_TRANSPORT                              | 17  | -1.890 | 0.000 | 0.017 |
| GO_OXIDATIVE_PHOSPHORYLATION                                                         | 71  | -1.892 | 0.000 | 0.017 |
| GO_OXIDOREDUCTASE_ACTIVITY_ACTING_ON_NAD_P_H_QUINONE_OR_SIMILAR_COMPOUND_AS_ACCEPTOR | 46  | -1.892 | 0.000 | 0.018 |
| GO_STRUCTURAL_CONSTITUENT_OF_RIBOSOME                                                | 188 | -1.880 | 0.000 | 0.018 |
| GO_CORTICAL_ACTIN_CYTOSKELETON                                                       | 32  | -1.880 | 0.000 | 0.019 |
| GO_RESPIRATORY_CHAIN                                                                 | 67  | -1.859 | 0.000 | 0.024 |
| GO_NUCLEAR_TRANSCRIBED_MRNA_CATABOLIC_PROCESS_NONSENSE_MEDIATED_DECAY                | 112 | -1.853 | 0.000 | 0.025 |
| GO_PURINE_NUCLEOSIDE_BIOSYNTHETIC_PROCESS                                            | 67  | -1.854 | 0.000 | 0.026 |
| GO_PURINE_CONTAINING_COMPOUND_BIOSYNTHETIC_PROCESS                                   | 89  | -1.835 | 0.000 | 0.031 |
| GO_RIBOSOME                                                                          | 202 | -1.831 | 0.000 | 0.032 |
| GO_RIBOSOMAL_SUBUNIT                                                                 | 151 | -1.829 | 0.000 | 0.032 |
| GO_NUCLEOSIDE_TRIPHOSPHATE_METABOLIC_PROCESS                                         | 169 | -1.815 | 0.000 | 0.036 |
| GO_NUCLEOSIDE_MONOPHOSPHATE_METABOLIC_PROCESS                                        | 181 | -1.808 | 0.000 | 0.039 |
| GO_CYTOSOLIC_SMALL_RIBOSOMAL_SUBUNIT                                                 | 40  | -1.805 | 0.000 | 0.040 |
| GO_MITOCHONDRIAL_TRANSMEMBRANE_TRANSPORT                                             | 49  | -1.786 | 0.000 | 0.048 |
| GO_CELLULAR_RESPONSE_TO_CALCIIUM_ION                                                 | 30  | -1.787 | 0.000 | 0.049 |
| GO_HYDROGEN_ION_TRANSMEMBRANE_TRANSPORT                                              | 68  | -1.777 | 0.000 | 0.050 |
| GO_Glutathione_TRANSFERase_Activity                                                  | 18  | -1.779 | 0.000 | 0.050 |
| GO_LUMENAL_SIDE_OF_MEMBRANE                                                          | 30  | -1.770 | 0.000 | 0.054 |
| GO_NUCLEOSIDE_PHOSPHATE_BIOSYNTHETIC_PROCESS                                         | 121 | -1.764 | 0.000 | 0.056 |
| GO_TRANSFERASE_ACTIVITY_TRANSFERRING_ALKYL_OR_ARYL_OTHER_THAN_METHYL_GROUPS          | 44  | -1.762 | 0.000 | 0.056 |
| GO_HEXOSE_CATABOLIC_PROCESS                                                          | 34  | -1.750 | 0.000 | 0.062 |
| GO_CELL_CELL_CONTACT_ZONE                                                            | 30  | -1.742 | 0.000 | 0.067 |
| GO_PEPTIDE_METABOLIC_PROCESS                                                         | 435 | -1.742 | 0.000 | 0.068 |
| GO_CELLULAR_RESPIRATION                                                              | 123 | -1.733 | 0.000 | 0.069 |
| GO_GLYCOSYL_COMPOUND_METABOLIC_PROCESS                                               | 261 | -1.719 | 0.000 | 0.081 |
| GO_GLYCOSYL_COMPOUND_BIOSYNTHETIC_PROCESS                                            | 91  | -1.713 | 0.000 | 0.084 |
| GO_CYTOSOLIC_PART                                                                    | 180 | -1.693 | 0.000 | 0.099 |
| GO_OXIDOREDUCTASE_ACTIVITY                                                           | 400 | -1.695 | 0.000 | 0.100 |
| GO_AMIDE_BIOSYNTHETIC_PROCESS                                                        | 407 | -1.672 | 0.000 | 0.120 |
| GO_CELL_SUBSTRATE_JUNCTION                                                           | 282 | -1.660 | 0.000 | 0.135 |
| GO_NUCLEOBASE_CONTAINING_SMALL_MOLECULE_METABOLIC_PROCESS                            | 361 | -1.620 | 0.000 | 0.173 |
| GO_PURINE_CONTAINING_COMPOUND_METABOLIC_PROCESS                                      | 257 | -1.610 | 0.000 | 0.188 |
| GO_MULTI_ORGANISM_METABOLIC_PROCESS                                                  | 131 | -1.596 | 0.000 | 0.200 |
| GO_SMALL_MOLECULE_CATABOLIC_PROCESS                                                  | 197 | -1.594 | 0.000 | 0.202 |
| GO_MICROBODY                                                                         | 93  | -1.589 | 0.000 | 0.208 |
| GO_CELLULAR_AMINO_ACID_METABOLIC_PROCESS                                             | 198 | -1.548 | 0.000 | 0.241 |
| GO_ORGANELLE_INNER_MEMBRANE                                                          | 398 | -1.555 | 0.000 | 0.241 |
| GO_PROTEIN_REFOLDING                                                                 | 20  | 2.586  | 0.000 | 0.000 |
| GO_CYCLIC_NUCLEOTIDE_METABOLIC_PROCESS                                               | 24  | 2.146  | 0.000 | 0.062 |
| GO_REGULATION_OF_CELLULAR_RESPONSE_TO_HEAT                                           | 64  | 2.014  | 0.000 | 0.077 |
| GO_NECROPTOTIC_PROCESS                                                               | 18  | 2.021  | 0.000 | 0.084 |
| GO_NUCLEOCYTOPLASMIC_TRANSPORTER_ACTIVITY                                            | 22  | 1.986  | 0.000 | 0.086 |
| GO_AMMONIUM_ION_BINDING                                                              | 19  | 2.029  | 0.000 | 0.094 |
| GO_ENDODERMAL_CELL_DIFFERENTIATION                                                   | 20  | 2.043  | 0.000 | 0.103 |
| GO_CUL3_RING_UBIQUITIN_LIGASE_COMPLEX                                                | 39  | 1.783  | 0.000 | 0.191 |
| GO_CYCLIC_NUCLEOTIDE_MEDIATED_SIGNALING                                              | 19  | 1.783  | 0.000 | 0.201 |
| GO_UNFOLDED_PROTEIN_BINDING                                                          | 74  | 1.758  | 0.000 | 0.204 |
| GO_SULFUR_COMPOUND_METABOLIC_PROCESS                                                 | 211 | -1.541 | 0.001 | 0.245 |
| GO_GENERATION_OF_PRECURSOR_METABOLITES_AND_ENERGY                                    | 216 | -1.551 | 0.001 | 0.242 |
| GO_REGULATION_OF_PROTEIN_BINDING                                                     | 110 | -1.534 | 0.001 | 0.248 |
| GO_HYDROGEN_TRANSPORT                                                                | 91  | -1.603 | 0.001 | 0.196 |
| GO_OXIDOREDUCTASE_COMPLEX                                                            | 79  | -1.719 | 0.001 | 0.079 |
| GO_REGENERATION                                                                      | 83  | -1.648 | 0.001 | 0.138 |
| GO_LARGE_RIBOSOMAL_SUBUNIT                                                           | 87  | -1.735 | 0.001 | 0.070 |
| GO_ELECTRON_CARRIER_ACTIVITY                                                         | 80  | -1.659 | 0.001 | 0.135 |
| GO_OXIDOREDUCTASE_ACTIVITY_ACTING_ON_CH_OH_GROUP_OF_DONORS                           | 72  | -1.636 | 0.001 | 0.153 |

|                                                                                          |     |        |       |       |
|------------------------------------------------------------------------------------------|-----|--------|-------|-------|
| GO_OXIDOREDUCTASE_ACTIVITY_ACTING_ON_THE_CH_OH_GROUP_OF_DONORS_NAD_OR_NADP_AS_ACCEPTOR   | 63  | -1.685 | 0.001 | 0.108 |
| GO_OXIDOREDUCTASE_ACTIVITY_ACTING_ON_NAD_P_H                                             | 70  | -1.658 | 0.001 | 0.134 |
| GO_SMALL_RIBOSOMAL_SUBUNIT                                                               | 64  | -1.668 | 0.001 | 0.125 |
| GO_PROTON_TRANSPORTING_TWO_SECTOR_ATPASE_COMPLEX                                         | 38  | -1.734 | 0.001 | 0.070 |
| GO_MONOSACCHARIDE_CATABOLIC_PROCESS                                                      | 41  | -1.719 | 0.001 | 0.080 |
| GO_REGULATION_OF_MITOCHONDRIAL_MEMBRANE_POTENTIAL                                        | 40  | -1.785 | 0.001 | 0.048 |
| GO_NAD_BINDING                                                                           | 40  | -1.799 | 0.001 | 0.043 |
| GO_GUANOSINE_CONTAINING_COMPOUND_METABOLIC_PROCESS                                       | 33  | -1.681 | 0.001 | 0.110 |
| GO_SUBSTANTIA_NIGRA_DEVELOPMENT                                                          | 33  | -1.779 | 0.001 | 0.051 |
| GO_NEGATIVE_REGULATION_OF_ACTIN_FILAMENT_POLYMERIZATION                                  | 23  | -1.698 | 0.001 | 0.098 |
| GO_ENERGY_COUPLED_PROTON_TRANSPORT_DOWN_ELECTROCHEMICAL_GRADIENT                         | 19  | -1.850 | 0.001 | 0.026 |
| GO_PROTON_TRANSPORTING_ATP_SYNTHASE_COMPLEX                                              | 20  | -1.757 | 0.001 | 0.058 |
| GO_REGULATION_OF_MYELOID_CELL_APOPTOTIC_PROCESS                                          | 18  | -1.741 | 0.001 | 0.066 |
| GO_EXTERNAL_SIDE_OF_PLASMA_MEMBRANE                                                      | 114 | -1.541 | 0.002 | 0.248 |
| GO_CLUSTER_OF_ACTIN_BASED_CELL_PROJECTIONS                                               | 60  | -1.627 | 0.002 | 0.164 |
| GO_PODOSOME                                                                              | 16  | -1.816 | 0.003 | 0.037 |
| GO_ALDO_KETO_REDUCTASE_NADP_ACTIVITY                                                     | 15  | -1.682 | 0.003 | 0.111 |
| GO_OLIGODENDROCYTE_DEVELOPMENT                                                           | 15  | -1.760 | 0.003 | 0.057 |
| GO_ORGANIC_ACID_CATABOLIC_PROCESS                                                        | 120 | -1.541 | 0.003 | 0.246 |
| GO_MONOSACCHARIDE_BIOSYNTHETIC_PROCESS                                                   | 40  | -1.699 | 0.004 | 0.099 |
| GO_GLUTATHIONE_METABOLIC_PROCESS                                                         | 33  | -1.629 | 0.004 | 0.162 |
| GO_PYRIMIDINE_DEOXYRIBONUCLEOTIDE_METABOLIC_PROCESS                                      | 16  | -1.649 | 0.004 | 0.139 |
| GO_NEUTRAL_AMINO_ACID_TRANSPORT                                                          | 17  | 1.734  | 0.004 | 0.214 |
| GO_CAMP_METABOLIC_PROCESS                                                                | 15  | 2.247  | 0.005 | 0.035 |
| GO_EXTRACELLULAR_MATRIX_BINDING                                                          | 18  | 1.776  | 0.005 | 0.190 |
| GO_MRNA_CLEAVAGE                                                                         | 19  | 1.847  | 0.005 | 0.216 |
| GO_HYDROLASE_ACTIVITY_ACTING_ON_CARBON_NITROGEN_BUT_NOT_PEPTIDE_BONDS_IN_CYCLIC_AMIDINES | 26  | -1.767 | 0.005 | 0.055 |
| GO_CELLULAR_RESPONSE_TO_HEAT                                                             | 21  | 1.819  | 0.005 | 0.192 |
| GO_ENDODERM_FORMATION                                                                    | 25  | 1.755  | 0.005 | 0.199 |
| GO_STEREOCILUM_BUNDLE                                                                    | 15  | -1.694 | 0.005 | 0.100 |
| GO_PRIMARY_CILIUM                                                                        | 79  | -1.596 | 0.005 | 0.202 |
| GO_MYD88_INDEPENDENT_TOLL_LIKE_RECEPTOR_SIGNALING_PATHWAY                                | 27  | 1.726  | 0.005 | 0.217 |
| GO_REGULATION_OF_CD4_POSITIVE_ALPHA_BETA_T_CELL_ACTIVATION                               | 27  | 1.789  | 0.005 | 0.218 |
| GO_ALPHA_AMINO_ACID_CATABOLIC_PROCESS                                                    | 46  | -1.654 | 0.006 | 0.135 |
| GO_NEURAL_NUCLEUS_DEVELOPMENT                                                            | 40  | -1.637 | 0.006 | 0.153 |
| GO_CELLULAR_MODIFIED_AMINO_ACID_METABOLIC_PROCESS                                        | 114 | -1.548 | 0.006 | 0.241 |
| GO_INTERCALATED_DISC                                                                     | 21  | -1.644 | 0.006 | 0.143 |
| GO_GTP_METABOLIC_PROCESS                                                                 | 16  | -1.730 | 0.006 | 0.071 |
| GO_NEGATIVE_REGULATION_OF_PROTEIN_BINDING                                                | 48  | -1.562 | 0.007 | 0.235 |
| GO_INTEGRIN_MEDIATED_SIGNALING_PATHWAY                                                   | 53  | -1.552 | 0.007 | 0.244 |
| GO_NUCLEOTIDE_PHOSPHORYLATION                                                            | 43  | -1.568 | 0.007 | 0.233 |
| GO_MYOSIN_COMPLEX                                                                        | 26  | -1.578 | 0.007 | 0.225 |
| GO_INTRAMOLECULAR_OXIDOREDUCTASE_ACTIVITY                                                | 33  | -1.674 | 0.007 | 0.119 |
| GO_NEGATIVE_REGULATION_OF_REPRODUCTIVE_PROCESS                                           | 22  | -1.648 | 0.008 | 0.139 |
| GO_CARBOHYDRATE_CATABOLIC_PROCESS                                                        | 75  | -1.550 | 0.008 | 0.241 |
| GO_REGULATION_OF_ACTIN_NUCLEATION                                                        | 19  | -1.652 | 0.008 | 0.136 |
| GO_CELLULAR_AMINO_ACID_CATABOLIC_PROCESS                                                 | 61  | -1.575 | 0.008 | 0.229 |
| GO_PIGMENT_METABOLIC_PROCESS                                                             | 38  | -1.630 | 0.008 | 0.163 |
| GO_CALCIIUM_MEDIATED_SIGNALING                                                           | 48  | -1.574 | 0.008 | 0.229 |
| GO_PYRIMIDINE_NUCLEOTIDE_METABOLIC_PROCESS                                               | 40  | -1.603 | 0.008 | 0.197 |
| GO_CAMP_MEDIATED_SIGNALING                                                               | 15  | 1.839  | 0.008 | 0.193 |
| GO_LYSINE_ACETYLATED_HISTONE_BINDING                                                     | 16  | 1.787  | 0.008 | 0.207 |
| GO_CELL_GROWTH                                                                           | 71  | -1.558 | 0.009 | 0.238 |
| GO_REGULATION_OF_MEMBRANE_DEPOLARIZATION                                                 | 18  | -1.571 | 0.010 | 0.232 |
| GO_PYRIMIDINE_CONTAINING_COMPOUND_METABOLIC_PROCESS                                      | 59  | -1.557 | 0.010 | 0.240 |
| GO_MHC_CLASS_II_PROTEIN_COMPLEX                                                          | 16  | -1.597 | 0.010 | 0.201 |
| GO_RIBOSOME_ASSEMBLY                                                                     | 43  | -1.575 | 0.010 | 0.230 |
| GO_PIGMENT_BIOSYNTHETIC_PROCESS                                                          | 33  | -1.603 | 0.011 | 0.195 |
| GO_LYMPHOCYTE_COSTIMULATION                                                              | 53  | -1.566 | 0.011 | 0.232 |
| GO_ORGAN_REGENERATION                                                                    | 45  | -1.568 | 0.011 | 0.235 |
| GO_STEROL_HOMEOSTASIS                                                                    | 25  | -1.610 | 0.012 | 0.187 |
| GO_OXIDOREDUCTASE_ACTIVITY_ACTING_ON_A_HEME_GROUP_OF_DONORS                              | 18  | -1.618 | 0.013 | 0.176 |
| GO_HOMEOSTASIS_OF_NUMBER_OF_CELLS_WITHIN_A_TISSUE                                        | 21  | -1.625 | 0.013 | 0.166 |
| GO_COPI_COATED_VESICLE                                                                   | 19  | -1.657 | 0.013 | 0.132 |
| GO_MEMBRANE_BIOGENESIS                                                                   | 15  | -1.658 | 0.013 | 0.133 |
| GO_INTRINSIC_COMPONENT_OF_MITOCHONDRIAL_INNER_MEMBRANE                                   | 15  | -1.616 | 0.013 | 0.177 |
| GO_REACTIVE_OXYGEN_SPECIES_METABOLIC_PROCESS                                             | 53  | -1.553 | 0.013 | 0.244 |
| GO_NEGATIVE_REGULATION_OF_OSTEOCLAST_DIFFERENTIATION                                     | 17  | 1.840  | 0.014 | 0.208 |
| GO_RESPONSE_TO_VITAMIN                                                                   | 48  | -1.565 | 0.014 | 0.231 |
| GO_DEOXYRIBONUCLEOTIDE_METABOLIC_PROCESS                                                 | 29  | -1.552 | 0.015 | 0.242 |
| GO_POSITIVE_REGULATION_OF_PHOSPHOLIPID_METABOLIC_PROCESS                                 | 19  | -1.543 | 0.015 | 0.246 |
| GO_DE_NOVO_PROTEIN_FOLDING                                                               | 15  | 1.857  | 0.015 | 0.223 |
| GO_CLATHRIN_COATED_ENDOCYTIC_VESICLE_MEMBRANE                                            | 31  | -1.593 | 0.016 | 0.201 |
| GO_DEOXYRIBOSE_PHOSPHATE_CATABOLIC_PROCESS                                               | 20  | -1.600 | 0.016 | 0.196 |
| GO_POSITIVE_REGULATION_OF_MONOOXYGENASE_ACTIVITY                                         | 20  | -1.564 | 0.017 | 0.233 |
| GO_PROTEIN_PHOSPHORYLATED_AMINO_ACID_BINDING                                             | 18  | -1.561 | 0.017 | 0.234 |
| GO GRANULOCYTE_ACTIVATION                                                                | 16  | -1.579 | 0.017 | 0.224 |

|                                                                 |    |        |       |       |
|-----------------------------------------------------------------|----|--------|-------|-------|
| GO_REGULATION_OF_T_HELPER_CELL_DIFFERENTIATION                  | 16 | 1.750  | 0.017 | 0.197 |
| GO_PROTEIN_DESTABILIZATION                                      | 27 | -1.587 | 0.017 | 0.209 |
| GO_VIRAL_GENOME_REPLICATION                                     | 17 | -1.566 | 0.018 | 0.234 |
| GO_REGULATION_OF_VESICLE_FUSION                                 | 35 | -1.559 | 0.018 | 0.237 |
| GO_ESTROGEN_RECEPTOR_BINDING                                    | 28 | -1.550 | 0.018 | 0.243 |
| GO_NEURON_PROJECTION_EXTENSION                                  | 25 | -1.541 | 0.018 | 0.249 |
| GO_PHOTORECEPTOR_OUTER_SEGMENT                                  | 18 | -1.602 | 0.020 | 0.194 |
| GO_CHANNEL_INHIBITOR_ACTIVITY                                   | 21 | -1.547 | 0.020 | 0.239 |
| GO_RIBONUCLEOTIDE_CATABOLIC_PROCESS                             | 19 | 1.829  | 0.020 | 0.192 |
| GO_REGULATION_OF_TRANSCRIPTION_FROM_RNA_POLYMERASE_III_PROMOTER | 15 | -1.571 | 0.021 | 0.231 |
| GO_DEVELOPMENTAL_CELL_GROWTH                                    | 38 | -1.567 | 0.021 | 0.233 |
| GO_RIBOSOMAL_LARGE_SUBUNIT_ASSEMBLY                             | 18 | -1.537 | 0.021 | 0.248 |
| GO_NEGATIVE_REGULATION_OF_EPITHELIAL_CELL_MIGRATION             | 25 | -1.590 | 0.021 | 0.205 |
| GO_HOMOTYPIC_CELL_CELL_ADHESION                                 | 26 | -1.549 | 0.022 | 0.242 |
| GO_RESPONSE_TO_FLUID_SHEAR_STRESS                               | 23 | -1.534 | 0.022 | 0.250 |
| GO_NADH_METABOLIC_PROCESS                                       | 28 | -1.537 | 0.023 | 0.247 |
| GO_POLYSACCHARIDE_CATABOLIC_PROCESS                             | 16 | -1.547 | 0.023 | 0.240 |
| GO_RESPONSE_TO_INTERFERON_BETA                                  | 18 | -1.571 | 0.025 | 0.234 |
| GO_NUCLEOBASE_BIOSYNTHETIC_PROCESS                              | 15 | -1.550 | 0.025 | 0.239 |
| GO_PLATELET_AGGREGATION                                         | 24 | -1.538 | 0.025 | 0.248 |
| GO_T_CELL_RECEPTOR_COMPLEX                                      | 16 | -1.534 | 0.030 | 0.249 |
| GO_RESPONSE_TO_MINERALOCORTICOID                                | 18 | -1.566 | 0.030 | 0.233 |
| GO_PHOTORECEPTOR_CONNECTING_CILIUM                              | 15 | -1.537 | 0.030 | 0.249 |
| GO_REGULATION_OF_CELLULAR_RESPIRATION                           | 15 | -1.555 | 0.043 | 0.242 |
